# Supplementary material for: A whole-brain connectivity map of mouse insular cortex
Source: eLife. 2020 Sep 17;9:e55585. doi: 10.7554/eLife.55585 (PMC7538160; doi:10.7554/eLife.55585)
Supplement: Supplementary file 1. [file elife-55585-supp1.xlsx]

## Sheet: Sheet2
Low Hierearchy	abbreviation | name
	level 1		level 2		level 3
Amygdala	AA	anterior amygdaloid area
	APir	amygdalopiriform transition area
	BLA	basolateral amygdaloid nucleus	aBLA	anterior part
			pBLA	posterior part
			vBLA	ventral part
	BMA	basomedial amygdaloid nucleus	aBMA	anterior part
			pBMA	posterior part
	CeA	central nucleus of the amygdala	CeC	capsular part
			CeL	lateral part
			CeM	medial part
	LA	lateral amygdala
	EA	extended amygdala
	MeA	medial amygdaloid nucleus
	ACo	cortical amygdala areas
Assoc. Cortex	ECT	ectorhinal cortex
	ENT	enthorhinal cortex
	RSP	retrosplenial cortex
	TeA	temporal association cortex
	PERI	perirhinal cortex
	PtA	parietal association cortex
Basal Forebrain	BF	basal forebrain
Claustrum	Cl	claustrum
Hindbrain	PBN	parabrachial nucleus
	PPN	pedunculopontine nucleus
	MY	medulla
	CB	cerebellum
	V	motor trigeminal nucleus
Hippocampus	CA1, CA2, CA3	hippocampus (CA1, CA2, CA3)
	DG	hippocampus (Dentate gyrus)
Hypothalamus	LHZ	hypothalamus, lateral zone
	MHZ	hypothalamus, medial zone
Insular Cortex	AI	agranular insular cortex	AID	dorsal part
			AIV	ventral part
			AIP	posteria part
	DI	dysgranular insular cortex
	GI	granular insular cortex
	aIC	anterior insular cortex
	mIC	medial insular cortex
	pIC	posterior insular cortex
Midbrain	PAG	periaqueductal gray
	SNr	substantia nigra
	VTg	ventral tegmental area
	MRtN	midbrain reticular nucleus
	SC	superior colliculus
	IC	inferior colliculus
	RN	raphe nuclei
Motor Cortex	M1	primary motor cortex
	M2	secondary motor cortex
Olfactory	AON	anterior olfactory nucleus
	CxA	piriform-amygdala area
	En	endopiriform nucleus
	TT	tenia tecta
	LOT	nucleus of the lateral olfactory tract
	MOB	main olfactory bulb
Pallidum	BNST	bed nuclei of the stria terminus
	GP	globus pallidus
	PALv	ventral pallidum
	PALm	medial pallidum
Piriform	Pir	piriform cortex
Prefrontal	CG	cingulate cortex
	mPFC	medial prefrontral cortex
	OFC	orbitofrontal cortex
Sensory	S1	primary somatosensory cortex
	S2	secondary somatosensory cortex
	Au1	primary auditory cortex
	Au2	secondary auditory cortex
	V1	primary visual cortex
	V2	secondary visual cortex, or higher
Striatum	CPu	caudate putamen
	NAcC	nucleus accumbens, core
	NAcSh	nucleus accumbens, shell
	IPAC	fondus of striatum
	Tu	olfactory tubercle
Thalamus	VENT	ventral group of the dorsal thalamus	VAL	ventral anterior-lateral nucleus
			VM	ventral medial nucleus
			VP	ventral posterior complex	VPL	ventral posterolateral complex
					VPLpc	ventral posterolateral complex, parvicellular part
					VPM	ventral posteromedial nucleus
					VPMpc	ventral posteromedial nucleus, parvicellular part
	MGN	medial geniculate nucleus
	Po	posterior complex
	ATN	anterior group
	MD	medial group
	PVT	paraventricular nucleus
	ILM	intralaminar nuclei	RH	rhomboid nucleus
			CM	central medial nucleus
			PaF	parafascicular nucleus
	Hb	habenular nuclei

## Sheet: Sheet1
		Low Heirearchy	abbreviation | name
			level 1		level 2		level 3
		Amygdala	AA	anterior amygdaloid area
			APir	amygdalopiriform transition area
			BL	basolateral amygdaloid nucleus	BLA	basolateral amygdaloid nucleus, anterior part
					BLP	basolateral amygdaloid nucleus, posterior part
					BLV	basolateral amygdaloid nucleus, ventral part
			BM	basomedial amygdaloid nucleus	BMA	basomedial amygdaloid nucleus, anterior part
					BMP	basomedial amygdaloid nucleus, posterior part
			CeA	central nucleus of the amydala	CeC	central nucleus of the amydala, capsular part
					CeL	central nucleus of the amydala, lateral part
					CeM	central nucleus of the amydala, medial part
			EA	extended amygdala
			LA	lateral amygdala
			MeA	medial amygdaloid nucleus
			CxA	cortical amygdala areas
		Assoc. Cortex	Ect	ectorhinal cortex
			ENT	enthorhinal cortex
			RSP	retrosplenial cortex
			TeA	temporal association cortex
			PERI	perirhinal cortex
			PtA	parietal association cortex
		Basal Forebrain	BF	basal Forebrain
		Claustrum	Cl	claustrum
		Hindbrain	PB	parabrachial nucleus
			PPN	pedunculopontine nucleus
			MY	medulla
			CB	cerebellum
			V	motor trigeminal nucleus
		Hippocampus	CA1, CA2, CA3	hippocampus (CA1, CA2, CA3)
			DG	hippocampus (Dentate gyrus)
		Hypothalamus	LZ	hypothalamus, lateral zone
			MEZ	hypothalamus, medial zone
		Insular	AI	agranular insular cortex
			AID	agranular insular cortex, dorsal part
			AIP	agranular insular cortex, posterior part
			AIV	agranular insular cortex, ventral part
			DI	dysgranular insular cortex
			GI	granular insular cortex
			aIC	anterior insular cortex
			mIC	medial insular cortex
			pIC	posterior insular cortex
		Midbrain	PAG	periaqueductal gray
			SNr	substantia nigra
			VTg	ventral tegmental area
			MRN	midbrain reticular nucleus
			SC	superior colliculus
			IC	inferior colliculus
			RN	raphe nuclei
		Motor Cortex	M1	primary motor cortex
			M2	secondary motor cortex
		Olfactory	AON	anterior olfactory nucleus
			CxA	piriform -amygdala area
			EP	endopiriform nucleus
			TT	tenia tecta
			LOT	nucleus of the lateral olfactory tract
			MOB	main olfactory bulb
		Pallidum	BNST	bed nuclei of the stria terminus
			GP	globus pallidus
			PALv	ventral pallidum
			PALm	medial pallidum
		Piriform	Pir	piriform cortex
		Prefrontal	CG	cingulate cortex
			mPFC	medial prefrontral cortex
			ORB	orbitofrontal cortex
		Sensory	S1	primary somatosensory cortex
			S2	secondary somatosensory cortex
			Au1	primary auditory cortex
			Au2	secondary auditory cortex
			V1	primary visual cortex
			V2	secondary visual cortex, or higher
		Striatum	CPu	caudate putamen
			NAcC	nucleus accumbens, core
			NAcSh	nucleus accumbens, shell
			IPAC	fondus of striatum
			Tu	olfactory tubercle
		Thalamus	VENT	ventral group of the dorsal thalamus	VAL	ventral anterior-lateral nucleus of the thalamus
					VM	ventral medial nucleus of the thalamus
					VP	ventral posterior complex of the thalamus	VPL	ventral posterolateral complex of the thalamus
							VPLpc	ventral posterolateral complex of the thalamus, parvicellular part
							VPM	ventral posteromedial nucleus of the thalamus
							VPMpc	ventral posteromedial nucleus of the thalamus, parvicellular part
			MG	medial geniculate nucleus
			Po	posterior complex of the thalamus
			ATN	anterior group of the dorsal thalamus
			MD	medial group of the dorsal thalamus
			PVT	paraventricular nucleus of the thalamus
			ILM	intralaminar nuclei of the dorsal thalamus	RH	rhomboid nucleus
					CM	central medial thalamic nucleus
					PaF	parafascicular thalamic nucleus
			Hb	habenular nuclei
