# Supplementary material for: A whole-brain connectivity map of mouse insular cortex
Source: eLife. 2020 Sep 17;9:e55585. doi: 10.7554/eLife.55585 (PMC7538160; doi:10.7554/eLife.55585)
Supplement: Supplementary file 2. [file elife-55585-supp2.xlsx]

## Sheet: RAW DATA
Index	Tracing_Type	Genotype	Tracing_From	Animal	Injection Center	Subregions	Larger Brain Regions	Bregma	Count [Cells or Pixels]	Area [µm²]	Pixel Density [Pixel/mm²]	Percent_Total_Output	Percent_Density_Output	Cell_Density[cells/mm²]_Input	Percent_Total_Input
1	AAV	CamKIIa	aIC	aIC 1294	1.65	Piriform-Amygdalar Area	Olfactory areas	-0.2	4080	555460	0.007	0.010017	1.42276	NaN	NaN
2	AAV	CamKIIa	aIC	aIC 1294	1.65	Cortical Amygdala	Amygdala	-0.2	1834	210910	0.009	0.00450273	1.82927	NaN	NaN
3	AAV	CamKIIa	aIC	aIC 1294	1.65	Piriform Area	Piriform Cortex	-0.2	1521	1.13997e+06	0.001	0.00373427	0.203252	NaN	NaN
4	AAV	CamKIIa	aIC	aIC 1294	1.65	Claustrum	Claustrum	-0.2	14600	161300	0.091	0.0358451	18.4959	NaN	NaN
5	AAV	CamKIIa	aIC	aIC 1294	1.65	Extended Amygdala	Amygdala	-0.2	2432	670898	0.004	0.0059709	0.813008	NaN	NaN
6	AAV	CamKIIa	aIC	aIC 1294	1.65	Basal Forebrain	Basal Forebrain	-0.2	3008	178368	0.017	0.00738507	3.45528	NaN	NaN
7	AAV	CamKIIa	aIC	aIC 1294	1.65	Hypothalamic Lateral Zone	Hypothalamus	-0.2	128	1.50241e+06	8.52e-05	0.000314258	0.0173171	NaN	NaN
8	AAV	CamKIIa	aIC	aIC 1294	1.65	Agranular Insular Cortex, posterior	Insular Cortex	-0.2	16598	367547	0.045	0.0407504	9.14634	NaN	NaN
9	AAV	CamKIIa	aIC	aIC 1294	1.65	Dysgranular Insular Cortex	Insular Cortex	-0.2	48022	275006	0.175	0.117901	35.5691	NaN	NaN
10	AAV	CamKIIa	aIC	aIC 1294	1.65	Granular Insular Cortex	Insular Cortex	-0.2	78105	304676	0.256	0.191759	52.0325	NaN	NaN
11	AAV	CamKIIa	aIC	aIC 1294	1.65	Somatosensory Cortex, secondary	Sensory Cortex	-0.2	276563	1.47419e+06	0.188	0.679001	38.2114	NaN	NaN
12	AAV	CamKIIa	aIC	aIC 1294	1.65	Somatosensory Cortex, primary	Sensory Cortex	-0.2	203559	3.6654e+06	0.056	0.499766	11.3821	NaN	NaN
13	AAV	CamKIIa	aIC	aIC 1294	1.65	Motor Cortex, primary	Motor Cortex	-0.2	19261	565517	0.034	0.0472885	6.91057	NaN	NaN
14	AAV	CamKIIa	aIC	aIC 1294	1.65	Motor Cortex, secondary	Motor Cortex	-0.2	22475	845405	0.027	0.0551793	5.4878	NaN	NaN
15	AAV	CamKIIa	aIC	aIC 1294	1.65	Cingulate Cortex	Prefrontal Cortex	-0.2	5018	511127	0.01	0.0123199	2.03252	NaN	NaN
16	AAV	CamKIIa	aIC	aIC 1294	1.65	Medial Prefrontal Cortex	Prefrontal Cortex	-0.2	1046	434363	0.002	0.00256808	0.406504	NaN	NaN
17	AAV	CamKIIa	aIC	aIC 1294	1.65	Caudate Putamen	Striatum	-0.2	908751	4.73188e+06	0.192	2.23111	39.0244	NaN	NaN
18	AAV	CamKIIa	aIC	aIC 1294	1.65	Endopiriform Nucleus	Olfactory areas	-0.2	6184	343047	0.018	0.0151826	3.65854	NaN	NaN
19	AAV	CamKIIa	aIC	aIC 1294	1.65	Fundus of Striatum (IPAC)	Striatum	-0.2	45715	330340	0.138	0.112237	28.0488	NaN	NaN
20	AAV	CamKIIa	aIC	aIC 1294	1.65	Nucleus of the Lateral Olfactory Tract	Olfactory areas	-0.2	358	147749	0.002	0.000878941	0.406504	NaN	NaN
21	AAV	CamKIIa	aIC	aIC 1294	1.65	Globus Pallidus	Pallidum	-0.2	89230	1.0953e+06	0.081	0.219072	16.4634	NaN	NaN
22	AAV	CamKIIa	aIC	aIC 1294	1.65	Ventral Pallidum	Pallidum	-0.2	14837	579744	0.026	0.0364269	5.28455	NaN	NaN
23	AAV	CamKIIa	aIC	aIC 1294	1.65	Bed Nuclei of the Stria Terminalis (BNST)	Pallidum	-0.2	521	778939	0.0006689	0.00127913	0.135955	NaN	NaN
24	AAV	CamKIIa	aIC	aIC 1294	1.65	Anterior Amygdaloid Area	Amygdala	-0.2	12348	361794	0.034	0.0303161	6.91057	NaN	NaN
25	AAV	CamKIIa	aIC	aIC 1294	1.65	Piriform-Amygdalar Area	Olfactory areas	-0.3	1708	502001	0.003	0.00419338	0.609756	NaN	NaN
26	AAV	CamKIIa	aIC	aIC 1294	1.65	Cortical Amygdala	Amygdala	-0.3	914	202917	0.005	0.002244	1.01626	NaN	NaN
27	AAV	CamKIIa	aIC	aIC 1294	1.65	Nucleus of the Lateral Olfactory Tract	Olfactory areas	-0.3	979	171273	0.006	0.00240358	1.21951	NaN	NaN
28	AAV	CamKIIa	aIC	aIC 1294	1.65	Piriform Area	Piriform Cortex	-0.3	661	1.46817e+06	0.0004502	0.00162285	0.0915041	NaN	NaN
29	AAV	CamKIIa	aIC	aIC 1294	1.65	Endopiriform Nucleus	Olfactory areas	-0.3	1421	224649	0.006	0.00348876	1.21951	NaN	NaN
30	AAV	CamKIIa	aIC	aIC 1294	1.65	Caudate Putamen	Striatum	-0.3	620036	3.97533e+06	0.156	1.52228	31.7073	NaN	NaN
31	AAV	CamKIIa	aIC	aIC 1294	1.65	Globus Pallidus	Pallidum	-0.3	129389	1.1343e+06	0.114	0.317668	23.1707	NaN	NaN
32	AAV	CamKIIa	aIC	aIC 1294	1.65	Ventral Pallidum	Pallidum	-0.3	10348	334107	0.031	0.0254058	6.30081	NaN	NaN
33	AAV	CamKIIa	aIC	aIC 1294	1.65	Basal Forebrain	Basal Forebrain	-0.3	361	38682.6	0.009	0.000886306	1.82927	NaN	NaN
34	AAV	CamKIIa	aIC	aIC 1294	1.65	Extended Amygdala	Amygdala	-0.3	2802	475290	0.006	0.00687931	1.21951	NaN	NaN
35	AAV	CamKIIa	aIC	aIC 1294	1.65	Agranular Insular Cortex, posterior	Insular Cortex	-0.3	60463	559180	0.108	0.148445	21.9512	NaN	NaN
36	AAV	CamKIIa	aIC	aIC 1294	1.65	Dysgranular Insular Cortex	Insular Cortex	-0.3	65149	317404	0.205	0.15995	41.6667	NaN	NaN
37	AAV	CamKIIa	aIC	aIC 1294	1.65	Granular Insular Cortex	Insular Cortex	-0.3	39255	332063	0.118	0.0963766	23.9837	NaN	NaN
38	AAV	CamKIIa	aIC	aIC 1294	1.65	Somatosensory Cortex, secondary	Sensory Cortex	-0.3	109994	1.44732e+06	0.076	0.270051	15.4472	NaN	NaN
39	AAV	CamKIIa	aIC	aIC 1294	1.65	Somatosensory Cortex, primary	Sensory Cortex	-0.3	59156	3751293	0.016	0.145236	3.25203	NaN	NaN
40	AAV	CamKIIa	aIC	aIC 1294	1.65	Motor Cortex, primary	Motor Cortex	-0.3	4190	488559	0.009	0.010287	1.82927	NaN	NaN
41	AAV	CamKIIa	aIC	aIC 1294	1.65	Motor Cortex, secondary	Motor Cortex	-0.3	5483	502221	0.011	0.0134615	2.23577	NaN	NaN
42	AAV	CamKIIa	aIC	aIC 1294	1.65	Cingulate Cortex	Prefrontal Cortex	-0.3	1614	564021	0.003	0.0039626	0.609756	NaN	NaN
43	AAV	CamKIIa	aIC	aIC 1294	1.65	Medial Prefrontal Cortex	Prefrontal Cortex	-0.3	157	269978	0.0005815	0.000385457	0.118191	NaN	NaN
44	AAV	CamKIIa	aIC	aIC 1294	1.65	Bed Nuclei of the Stria Terminalis (BNST)	Pallidum	-0.3	775	748220	0.001	0.00190273	0.203252	NaN	NaN
45	AAV	CamKIIa	aIC	aIC 1294	1.65	Anterior Amygdaloid Area	Amygdala	-0.3	8133	572543	0.014	0.0199677	2.84553	NaN	NaN
46	AAV	CamKIIa	aIC	aIC 1294	1.65	Claustrum	Claustrum	-0.3	14720	135052	0.109	0.0361397	22.1545	NaN	NaN
47	AAV	CamKIIa	aIC	aIC 1294	1.65	Fundus of Striatum (IPAC)	Striatum	-0.3	43820	328037	0.134	0.107584	27.2358	NaN	NaN
48	AAV	CamKIIa	aIC	aIC 1294	1.65	Basal Forebrain	Basal Forebrain	-0.3	1340	199638	0.007	0.00328989	1.42276	NaN	NaN
49	AAV	CamKIIa	aIC	aIC 1294	1.65	Piriform-Amygdalar Area	Olfactory areas	-0.5	571	370369	0.002	0.00140189	0.406504	NaN	NaN
50	AAV	CamKIIa	aIC	aIC 1294	1.65	Cortical Amygdala	Amygdala	-0.5	1055	356134	0.003	0.00259017	0.609756	NaN	NaN
51	AAV	CamKIIa	aIC	aIC 1294	1.65	Nucleus of the Lateral Olfactory Tract	Olfactory areas	-0.5	1004	246960	0.004	0.00246496	0.813008	NaN	NaN
52	AAV	CamKIIa	aIC	aIC 1294	1.65	Piriform Area	Piriform Cortex	-0.5	535	1147531	0.0004662	0.0013135	0.0947561	NaN	NaN
53	AAV	CamKIIa	aIC	aIC 1294	1.65	Claustrum	Claustrum	-0.5	13761	190892	0.072	0.0337852	14.6341	NaN	NaN
54	AAV	CamKIIa	aIC	aIC 1294	1.65	Endopiriform Nucleus	Olfactory areas	-0.5	2249	302452	0.007	0.00552161	1.42276	NaN	NaN
55	AAV	CamKIIa	aIC	aIC 1294	1.65	Hypothalamic Lateral Zone	Hypothalamus	-0.5	7477	1.19778e+06	0.006	0.0183571	1.21951	NaN	NaN
56	AAV	CamKIIa	aIC	aIC 1294	1.65	Agranular Insular Cortex, posterior	Insular Cortex	-0.5	72760	504698	0.144	0.178636	29.2683	NaN	NaN
57	AAV	CamKIIa	aIC	aIC 1294	1.65	Dysgranular Insular Cortex	Insular Cortex	-0.5	54754	252775	0.217	0.134429	44.1057	NaN	NaN
58	AAV	CamKIIa	aIC	aIC 1294	1.65	Granular Insular Cortex	Insular Cortex	-0.5	52318	279651	0.187	0.128448	38.0081	NaN	NaN
59	AAV	CamKIIa	aIC	aIC 1294	1.65	Somatosensory Cortex, secondary	Sensory Cortex	-0.5	175459	1.5382e+06	0.114	0.430777	23.1707	NaN	NaN
60	AAV	CamKIIa	aIC	aIC 1294	1.65	Somatosensory Cortex, primary	Sensory Cortex	-0.5	79860	3.91337e+06	0.02	0.196068	4.06504	NaN	NaN
61	AAV	CamKIIa	aIC	aIC 1294	1.65	Motor Cortex, primary	Motor Cortex	-0.5	9374	520886	0.018	0.0230145	3.65854	NaN	NaN
62	AAV	CamKIIa	aIC	aIC 1294	1.65	Motor Cortex, secondary	Motor Cortex	-0.5	3832	540029	0.007	0.0094081	1.42276	NaN	NaN
63	AAV	CamKIIa	aIC	aIC 1294	1.65	Cingulate Cortex	Prefrontal Cortex	-0.5	683	373284	0.002	0.00167686	0.406504	NaN	NaN
64	AAV	CamKIIa	aIC	aIC 1294	1.65	Medial Prefrontal Cortex	Prefrontal Cortex	-0.5	198	303304	0.0006528	0.000486118	0.132683	NaN	NaN
65	AAV	CamKIIa	aIC	aIC 1294	1.65	Intralaminar Nuclei of the Dorsal Thalamus	Thalamus	-0.5	41563	748994	0.055	0.102043	11.1789	NaN	NaN
66	AAV	CamKIIa	aIC	aIC 1294	1.65	Anterodorsal Thalamic Nucleus	Thalamus	-0.5	2034	298218	0.007	0.00499376	1.42276	NaN	NaN
67	AAV	CamKIIa	aIC	aIC 1294	1.65	Mediodorsal Thalamic Nuclei	Thalamus	-0.5	176	161030	0.001	0.000432105	0.203252	NaN	NaN
68	AAV	CamKIIa	aIC	aIC 1294	1.65	Basolateral Nucleus	Amygdala	-0.5	31056	98625.2	0.315	0.0762469	64.0244	NaN	NaN
69	AAV	CamKIIa	aIC	aIC 1294	1.65	Anterior Amygdaloid Area	Amygdala	-0.5	1726	344470	0.005	0.00423757	1.01626	NaN	NaN
70	AAV	CamKIIa	aIC	aIC 1294	1.65	Caudate Putamen	Striatum	-0.5	672256	3.84572e+06	0.175	1.65048	35.5691	NaN	NaN
71	AAV	CamKIIa	aIC	aIC 1294	1.65	Fundus of Striatum (IPAC)	Striatum	-0.5	59555	307816	0.193	0.146216	39.2276	NaN	NaN
72	AAV	CamKIIa	aIC	aIC 1294	1.65	Globus Pallidus	Pallidum	-0.5	127362	1114407	0.114	0.312692	23.1707	NaN	NaN
73	AAV	CamKIIa	aIC	aIC 1294	1.65	Central Nucleus of Amygdala	Amygdala	-0.5	2882	85332.5	0.034	0.00707572	6.91057	NaN	NaN
74	AAV	CamKIIa	aIC	aIC 1294	1.65	Basomedial Nucleus	Amygdala	-0.5	1474	186453	0.008	0.00361888	1.62602	NaN	NaN
75	AAV	CamKIIa	aIC	aIC 1294	1.65	Basal Forebrain	Basal Forebrain	-0.5	183	50285.8	0.004	0.000449291	0.813008	NaN	NaN
76	AAV	CamKIIa	aIC	aIC 1294	1.65	Extended Amygdala	Amygdala	-0.5	41339	357878	0.116	0.101493	23.5772	NaN	NaN
77	AAV	CamKIIa	aIC	aIC 1294	1.65	Intralaminar Nuclei of the Dorsal Thalamus	Thalamus	-0.5	269	612194	0.0004394	0.000660433	0.0893089	NaN	NaN
78	AAV	CamKIIa	aIC	aIC 1294	1.65	Paraventricular Thalamic Nucleus	Thalamus	-0.5	725	578294	0.001	0.00177998	0.203252	NaN	NaN
79	AAV	CamKIIa	aIC	aIC 1294	1.65	Piriform-Amygdalar Area	Olfactory areas	-0.7	570	276546	0.002	0.00139943	0.406504	NaN	NaN
80	AAV	CamKIIa	aIC	aIC 1294	1.65	Nucleus of the Lateral Olfactory Tract	Olfactory areas	-0.7	127	261346	0.0004859	0.000311803	0.0987602	NaN	NaN
81	AAV	CamKIIa	aIC	aIC 1294	1.65	Piriform Area	Piriform Cortex	-0.7	1308	1.40322e+06	0.0009321	0.00321133	0.189451	NaN	NaN
82	AAV	CamKIIa	aIC	aIC 1294	1.65	Claustrum	Claustrum	-0.7	5199	134697	0.039	0.0127643	7.92683	NaN	NaN
83	AAV	CamKIIa	aIC	aIC 1294	1.65	Globus Pallidus	Pallidum	-0.7	105925	1.26364e+06	0.084	0.260061	17.0732	NaN	NaN
84	AAV	CamKIIa	aIC	aIC 1294	1.65	Fundus of Striatum (IPAC)	Striatum	-0.7	73864	326857	0.226	0.181347	45.935	NaN	NaN
85	AAV	CamKIIa	aIC	aIC 1294	1.65	Hypothalamic Lateral Zone	Hypothalamus	-0.7	685	1.35295e+06	0.0005063	0.00168177	0.102907	NaN	NaN
86	AAV	CamKIIa	aIC	aIC 1294	1.65	Dysgranular Insular Cortex	Insular Cortex	-0.7	63855	300697	0.212	0.156773	43.0894	NaN	NaN
87	AAV	CamKIIa	aIC	aIC 1294	1.65	Granular Insular Cortex	Insular Cortex	-0.7	49112	308059	0.159	0.120577	32.3171	NaN	NaN
88	AAV	CamKIIa	aIC	aIC 1294	1.65	Somatosensory Cortex, secondary	Sensory Cortex	-0.7	69819	1.22066e+06	0.057	0.171416	11.5854	NaN	NaN
89	AAV	CamKIIa	aIC	aIC 1294	1.65	Somatosensory Cortex, primary	Sensory Cortex	-0.7	59885	3.8405e+06	0.016	0.147026	3.25203	NaN	NaN
90	AAV	CamKIIa	aIC	aIC 1294	1.65	Motor Cortex, primary	Motor Cortex	-0.7	6926	297461	0.023	0.0170043	4.6748	NaN	NaN
91	AAV	CamKIIa	aIC	aIC 1294	1.65	Motor Cortex, secondary	Motor Cortex	-0.7	5657	266111	0.021	0.0138887	4.26829	NaN	NaN
92	AAV	CamKIIa	aIC	aIC 1294	1.65	Cingulate Cortex	Prefrontal Cortex	-0.7	2045	570101	0.004	0.00502076	0.813008	NaN	NaN
93	AAV	CamKIIa	aIC	aIC 1294	1.65	Medial Prefrontal Cortex	Prefrontal Cortex	-0.7	268	224734	0.001	0.000657978	0.203252	NaN	NaN
94	AAV	CamKIIa	aIC	aIC 1294	1.65	Central Nucleus of Amygdala	Amygdala	-0.7	586	161665	0.004	0.00143871	0.813008	NaN	NaN
95	AAV	CamKIIa	aIC	aIC 1294	1.65	Agranular Insular Cortex, posterior	Insular Cortex	-0.7	21613	330211	0.065	0.053063	13.2114	NaN	NaN
96	AAV	CamKIIa	aIC	aIC 1294	1.65	Lateral Amygdala	Amygdala	-0.7	3501	50144.6	0.07	0.00859545	14.2276	NaN	NaN
97	AAV	CamKIIa	aIC	aIC 1294	1.65	Basolateral Nucleus	Amygdala	-0.7	82309	209126	0.394	0.20208	80.0813	NaN	NaN
98	AAV	CamKIIa	aIC	aIC 1294	1.65	Caudate Putamen	Striatum	-0.7	422740	3.36851e+06	0.125	1.03789	25.4065	NaN	NaN
99	AAV	CamKIIa	aIC	aIC 1294	1.65	Endopiriform Nucleus	Olfactory areas	-0.7	599	271403	0.002	0.00147063	0.406504	NaN	NaN
100	AAV	CamKIIa	aIC	aIC 1294	1.65	Extended Amygdala	Amygdala	-0.7	54389	638686	0.085	0.133533	17.2764	NaN	NaN
101	AAV	CamKIIa	aIC	aIC 1294	1.65	Cortical Amygdala	Amygdala	-0.7	452	247448	0.002	0.00110972	0.406504	NaN	NaN
102	AAV	CamKIIa	aIC	aIC 1294	1.65	Basomedial Nucleus	Amygdala	-0.7	1004	233869	0.004	0.00246496	0.813008	NaN	NaN
103	AAV	CamKIIa	aIC	aIC 1294	1.65	Intralaminar Nuclei of the Dorsal Thalamus	Thalamus	-0.7	75280	852214	0.088	0.184823	17.8862	NaN	NaN
104	AAV	CamKIIa	aIC	aIC 1294	1.65	Intralaminar Nuclei of the Dorsal Thalamus	Thalamus	-0.7	805	169920	0.005	0.00197639	1.01626	NaN	NaN
105	AAV	CamKIIa	aIC	aIC 1294	1.65	Intralaminar Nuclei of the Dorsal Thalamus	Thalamus	-0.7	620	315041	0.002	0.00152219	0.406504	NaN	NaN
106	AAV	CamKIIa	aIC	aIC 1294	1.65	Anterodorsal Thalamic Nucleus	Thalamus	-0.7	6536	713748	0.009	0.0160468	1.82927	NaN	NaN
107	AAV	CamKIIa	aIC	aIC 1294	1.65	Anterodorsal Thalamic Nucleus	Thalamus	-0.7	39	590164	6.61e-05	9.57505e-05	0.013435	NaN	NaN
108	AAV	CamKIIa	aIC	aIC 1294	1.65	Piriform-Amygdalar Area	Olfactory areas	-0.8	534	306548	0.002	0.00131105	0.406504	NaN	NaN
109	AAV	CamKIIa	aIC	aIC 1294	1.65	Cortical Amygdala	Amygdala	-0.8	271	423433	0.00064	0.000665343	0.130081	NaN	NaN
110	AAV	CamKIIa	aIC	aIC 1294	1.65	Basomedial Nucleus	Amygdala	-0.8	654	377870	0.002	0.00160566	0.406504	NaN	NaN
111	AAV	CamKIIa	aIC	aIC 1294	1.65	Piriform Area	Piriform Cortex	-0.8	1179	1.30128e+06	0.000906	0.00289461	0.184146	NaN	NaN
112	AAV	CamKIIa	aIC	aIC 1294	1.65	Claustrum	Claustrum	-0.8	4473	105105	0.043	0.0109818	8.73984	NaN	NaN
113	AAV	CamKIIa	aIC	aIC 1294	1.65	Agranular Insular Cortex, posterior	Insular Cortex	-0.8	23924	293677	0.081	0.0587368	16.4634	NaN	NaN
114	AAV	CamKIIa	aIC	aIC 1294	1.65	Dysgranular Insular Cortex	Insular Cortex	-0.8	62282	259486	0.24	0.152911	48.7805	NaN	NaN
115	AAV	CamKIIa	aIC	aIC 1294	1.65	Granular Insular Cortex	Insular Cortex	-0.8	34918	225663	0.155	0.0857286	31.5041	NaN	NaN
116	AAV	CamKIIa	aIC	aIC 1294	1.65	Somatosensory Cortex, secondary	Sensory Cortex	-0.8	72254	1.06934e+06	0.068	0.177394	13.8211	NaN	NaN
117	AAV	CamKIIa	aIC	aIC 1294	1.65	Somatosensory Cortex, primary	Sensory Cortex	-0.8	65028	4.38112e+06	0.015	0.159653	3.04878	NaN	NaN
118	AAV	CamKIIa	aIC	aIC 1294	1.65	Motor Cortex, primary	Motor Cortex	-0.8	4059	296585	0.014	0.00996542	2.84553	NaN	NaN
119	AAV	CamKIIa	aIC	aIC 1294	1.65	Motor Cortex, secondary	Motor Cortex	-0.8	7122	307077	0.023	0.0174855	4.6748	NaN	NaN
120	AAV	CamKIIa	aIC	aIC 1294	1.65	Retrosplenial Cortex	Association Cortex	-0.8	4719	544339	0.009	0.0115858	1.82927	NaN	NaN
121	AAV	CamKIIa	aIC	aIC 1294	1.65	Retrosplenial Cortex	Association Cortex	-0.8	1190	455465	0.003	0.00292162	0.609756	NaN	NaN
122	AAV	CamKIIa	aIC	aIC 1294	1.65	Central Nucleus of Amygdala	Amygdala	-0.8	2401	307595	0.008	0.00589479	1.62602	NaN	NaN
123	AAV	CamKIIa	aIC	aIC 1294	1.65	Paraventricular Thalamic Nucleus	Thalamus	-0.8	321	171545	0.002	0.0007881	0.406504	NaN	NaN
124	AAV	CamKIIa	aIC	aIC 1294	1.65	Mediodorsal Thalamic Nuclei	Thalamus	-0.8	691	160602	0.004	0.0016965	0.813008	NaN	NaN
125	AAV	CamKIIa	aIC	aIC 1294	1.65	Intralaminar Nuclei of the Dorsal Thalamus	Thalamus	-0.8	744	198299	0.004	0.00182663	0.813008	NaN	NaN
126	AAV	CamKIIa	aIC	aIC 1294	1.65	Intralaminar Nuclei of the Dorsal Thalamus	Thalamus	-0.8	356	442100	0.0008052	0.00087403	0.163659	NaN	NaN
127	AAV	CamKIIa	aIC	aIC 1294	1.65	Ventral Group of the Dorsal Thalamus	Thalamus	-0.8	17553	435355	0.04	0.0430951	8.13008	NaN	NaN
128	AAV	CamKIIa	aIC	aIC 1294	1.65	Ventral Group of the Dorsal Thalamus	Thalamus	-0.8	17237	729890	0.024	0.0423193	4.87805	NaN	NaN
129	AAV	CamKIIa	aIC	aIC 1294	1.65	Anterodorsal Thalamic Nucleus	Thalamus	-0.8	3776	396602	0.01	0.00927061	2.03252	NaN	NaN
130	AAV	CamKIIa	aIC	aIC 1294	1.65	Anterodorsal Thalamic Nucleus	Thalamus	-0.8	102	212709	0.0004795	0.000250424	0.0974593	NaN	NaN
131	AAV	CamKIIa	aIC	aIC 1294	1.65	Hypothalamic Medial Zone	Hypothalamus	-0.8	81	80926.4	0.001	0.000198866	0.203252	NaN	NaN
132	AAV	CamKIIa	aIC	aIC 1294	1.65	Anterodorsal Thalamic Nucleus	Thalamus	-0.8	4	132373	3.02e-05	9.82057e-06	0.00613821	NaN	NaN
133	AAV	CamKIIa	aIC	aIC 1294	1.65	Hypothalamic Lateral Zone	Hypothalamus	-0.8	15	49376.3	0.0003038	3.68271e-05	0.061748	NaN	NaN
134	AAV	CamKIIa	aIC	aIC 1294	1.65	Basolateral Nucleus	Amygdala	-0.8	82220	368404	0.223	0.201862	45.3252	NaN	NaN
135	AAV	CamKIIa	aIC	aIC 1294	1.65	Lateral Amygdala	Amygdala	-0.8	497	74887.7	0.007	0.00122021	1.42276	NaN	NaN
136	AAV	CamKIIa	aIC	aIC 1294	1.65	Endopiriform Nucleus	Olfactory areas	-0.8	538	305415	0.002	0.00132087	0.406504	NaN	NaN
137	AAV	CamKIIa	aIC	aIC 1294	1.65	Caudate Putamen	Striatum	-0.8	323809	2.79293e+06	0.116	0.794997	23.5772	NaN	NaN
138	AAV	CamKIIa	aIC	aIC 1294	1.65	Fundus of Striatum (IPAC)	Striatum	-0.8	53495	329039	0.163	0.131338	33.1301	NaN	NaN
139	AAV	CamKIIa	aIC	aIC 1294	1.65	Globus Pallidus	Pallidum	-0.8	47887	1.06385e+06	0.045	0.117569	9.14634	NaN	NaN
140	AAV	CamKIIa	aIC	aIC 1294	1.65	Extended Amygdala	Amygdala	-0.8	33387	375322	0.089	0.0819698	18.0894	NaN	NaN
141	AAV	CamKIIa	aIC	aIC 1294	1.65	Intralaminar Nuclei of the Dorsal Thalamus	Thalamus	-0.8	41692	596471	0.07	0.10236	14.2276	NaN	NaN
142	AAV	CamKIIa	aIC	aIC 1294	1.65	Piriform-Amygdalar Area	Olfactory areas	-0.9	74	171361	0.0004318	0.00018168	0.0877642	NaN	NaN
143	AAV	CamKIIa	aIC	aIC 1294	1.65	Cortical Amygdala	Amygdala	-0.9	295	361834	0.0008153	0.000724267	0.165711	NaN	NaN
144	AAV	CamKIIa	aIC	aIC 1294	1.65	Basomedial Nucleus	Amygdala	-0.9	215	338720	0.0006347	0.000527855	0.129004	NaN	NaN
145	AAV	CamKIIa	aIC	aIC 1294	1.65	Piriform Area	Piriform Cortex	-0.9	529	1.05561e+06	0.0005011	0.00129877	0.10185	NaN	NaN
146	AAV	CamKIIa	aIC	aIC 1294	1.65	Endopiriform Nucleus	Olfactory areas	-0.9	526	347350	0.002	0.0012914	0.406504	NaN	NaN
147	AAV	CamKIIa	aIC	aIC 1294	1.65	Agranular Insular Cortex, posterior	Insular Cortex	-0.9	59499	385241	0.154	0.146078	31.3008	NaN	NaN
148	AAV	CamKIIa	aIC	aIC 1294	1.65	Dysgranular Insular Cortex	Insular Cortex	-0.9	51325	236518	0.217	0.12601	44.1057	NaN	NaN
149	AAV	CamKIIa	aIC	aIC 1294	1.65	Granular Insular Cortex	Insular Cortex	-0.9	37994	264530	0.144	0.0932806	29.2683	NaN	NaN
150	AAV	CamKIIa	aIC	aIC 1294	1.65	Somatosensory Cortex, secondary	Sensory Cortex	-0.9	57075	892797	0.064	0.140127	13.0081	NaN	NaN
151	AAV	CamKIIa	aIC	aIC 1294	1.65	Somatosensory Cortex, primary	Sensory Cortex	-0.9	40029	4.63863e+06	0.009	0.0982769	1.82927	NaN	NaN
152	AAV	CamKIIa	aIC	aIC 1294	1.65	Motor Cortex, primary	Motor Cortex	-0.9	2998	312723	0.01	0.00736051	2.03252	NaN	NaN
153	AAV	CamKIIa	aIC	aIC 1294	1.65	Motor Cortex, secondary	Motor Cortex	-0.9	7223	369030	0.02	0.0177335	4.06504	NaN	NaN
154	AAV	CamKIIa	aIC	aIC 1294	1.65	Retrosplenial Cortex	Association Cortex	-0.9	6572	695229	0.009	0.0161352	1.82927	NaN	NaN
155	AAV	CamKIIa	aIC	aIC 1294	1.65	Retrosplenial Cortex	Association Cortex	-0.9	1638	698606	0.002	0.00402152	0.406504	NaN	NaN
156	AAV	CamKIIa	aIC	aIC 1294	1.65	Caudate Putamen	Striatum	-0.9	321559	2.75999e+06	0.117	0.789473	23.7805	NaN	NaN
157	AAV	CamKIIa	aIC	aIC 1294	1.65	Central Nucleus of Amygdala	Amygdala	-0.9	2512	314833	0.008	0.00616732	1.62602	NaN	NaN
158	AAV	CamKIIa	aIC	aIC 1294	1.65	Medial Amygdala	Amygdala	-0.9	1137	272117	0.004	0.0027915	0.813008	NaN	NaN
159	AAV	CamKIIa	aIC	aIC 1294	1.65	Extended Amygdala	Amygdala	-0.9	39216	302985	0.129	0.0962808	26.2195	NaN	NaN
160	AAV	CamKIIa	aIC	aIC 1294	1.65	Hypothalamic Lateral Zone	Hypothalamus	-0.9	3271	1.37733e+06	0.002	0.00803077	0.406504	NaN	NaN
161	AAV	CamKIIa	aIC	aIC 1294	1.65	Intralaminar Nuclei of the Dorsal Thalamus	Thalamus	-0.9	1820	160032	0.011	0.00446836	2.23577	NaN	NaN
162	AAV	CamKIIa	aIC	aIC 1294	1.65	Intralaminar Nuclei of the Dorsal Thalamus	Thalamus	-0.9	2374	573789	0.004	0.00582851	0.813008	NaN	NaN
163	AAV	CamKIIa	aIC	aIC 1294	1.65	Ventral Group of the Dorsal Thalamus	Thalamus	-0.9	54578	461457	0.118	0.133997	23.9837	NaN	NaN
164	AAV	CamKIIa	aIC	aIC 1294	1.65	Ventral Group of the Dorsal Thalamus	Thalamus	-0.9	2986	730437	0.004	0.00733105	0.813008	NaN	NaN
165	AAV	CamKIIa	aIC	aIC 1294	1.65	Anterodorsal Thalamic Nucleus	Thalamus	-0.9	4681	382742	0.012	0.0114925	2.43902	NaN	NaN
166	AAV	CamKIIa	aIC	aIC 1294	1.65	Anterodorsal Thalamic Nucleus	Thalamus	-0.9	39	236522	0.0001649	9.57505e-05	0.0335163	NaN	NaN
167	AAV	CamKIIa	aIC	aIC 1294	1.65	Hypothalamic Medial Zone	Hypothalamus	-0.9	1	80926.6	1.24e-05	2.45514e-06	0.00252033	NaN	NaN
168	AAV	CamKIIa	aIC	aIC 1294	1.65	Hypothalamic Medial Zone	Hypothalamus	-0.9	53	425442	0.0001246	0.000130123	0.0253252	NaN	NaN
169	AAV	CamKIIa	aIC	aIC 1294	1.65	Intralaminar Nuclei of the Dorsal Thalamus	Thalamus	-0.9	46748	588562	0.079	0.114773	16.0569	NaN	NaN
170	AAV	CamKIIa	aIC	aIC 1294	1.65	Hypothalamic Lateral Zone	Hypothalamus	-0.9	104	101460	0.001	0.000255335	0.203252	NaN	NaN
171	AAV	CamKIIa	aIC	aIC 1294	1.65	Claustrum	Claustrum	-0.9	10580	152486	0.069	0.0259754	14.0244	NaN	NaN
172	AAV	CamKIIa	aIC	aIC 1294	1.65	Basolateral Nucleus	Amygdala	-0.9	40776	343365	0.119	0.100111	24.187	NaN	NaN
173	AAV	CamKIIa	aIC	aIC 1294	1.65	Lateral Amygdala	Amygdala	-0.9	9329	136387	0.068	0.022904	13.8211	NaN	NaN
174	AAV	CamKIIa	aIC	aIC 1294	1.65	Globus Pallidus	Pallidum	-0.9	36525	878372	0.042	0.089674	8.53659	NaN	NaN
175	AAV	CamKIIa	aIC	aIC 1294	1.65	Anterior Amygdaloid Area	Amygdala	-0.9	3642	474072	0.008	0.00894163	1.62602	NaN	NaN
176	AAV	CamKIIa	aIC	aIC 1294	1.65	Basomedial Nucleus	Amygdala	-0.9	187	52143.9	0.004	0.000459111	0.813008	NaN	NaN
177	AAV	CamKIIa	aIC	aIC 1294	1.65	Intralaminar Nuclei of the Dorsal Thalamus	Thalamus	-0.9	16611	427171	0.039	0.0407824	7.92683	NaN	NaN
178	AAV	CamKIIa	aIC	aIC 1294	1.65	Intralaminar Nuclei of the Dorsal Thalamus	Thalamus	-0.9	2492	183145	0.014	0.00611821	2.84553	NaN	NaN
179	AAV	CamKIIa	aIC	aIC 1294	1.65	Anterodorsal Thalamic Nucleus	Thalamus	-0.9	1	87635.7	1.14e-05	2.45514e-06	0.00231707	NaN	NaN
180	AAV	CamKIIa	aIC	aIC 1294	1.65	Mediodorsal Thalamic Nuclei	Thalamus	-0.9	1121	82067.3	0.014	0.00275221	2.84553	NaN	NaN
181	AAV	CamKIIa	aIC	aIC 1294	1.65	Piriform-Amygdalar Area	Olfactory areas	-1	125	171361	0.0007295	0.000306893	0.148272	NaN	NaN
182	AAV	CamKIIa	aIC	aIC 1294	1.65	Cortical Amygdala	Amygdala	-1	522	361834	0.001	0.00128158	0.203252	NaN	NaN
183	AAV	CamKIIa	aIC	aIC 1294	1.65	Basomedial Nucleus	Amygdala	-1	1765	497890	0.004	0.00433332	0.813008	NaN	NaN
184	AAV	CamKIIa	aIC	aIC 1294	1.65	Piriform Area	Piriform Cortex	-1	2217	1.05561e+06	0.002	0.00544305	0.406504	NaN	NaN
185	AAV	CamKIIa	aIC	aIC 1294	1.65	Endopiriform Nucleus	Olfactory areas	-1	1675	296000	0.006	0.00411236	1.21951	NaN	NaN
186	AAV	CamKIIa	aIC	aIC 1294	1.65	Agranular Insular Cortex, posterior	Insular Cortex	-1	122325	415723	0.294	0.300325	59.7561	NaN	NaN
187	AAV	CamKIIa	aIC	aIC 1294	1.65	Dysgranular Insular Cortex	Insular Cortex	-1	93290	241668	0.386	0.22904	78.4553	NaN	NaN
188	AAV	CamKIIa	aIC	aIC 1294	1.65	Granular Insular Cortex	Insular Cortex	-1	66920	264530	0.253	0.164298	51.4228	NaN	NaN
189	AAV	CamKIIa	aIC	aIC 1294	1.65	Somatosensory Cortex, secondary	Sensory Cortex	-1	108281	892797	0.121	0.265845	24.5935	NaN	NaN
190	AAV	CamKIIa	aIC	aIC 1294	1.65	Somatosensory Cortex, primary	Sensory Cortex	-1	60048	4.30854e+06	0.014	0.147426	2.84553	NaN	NaN
191	AAV	CamKIIa	aIC	aIC 1294	1.65	Motor Cortex, primary	Motor Cortex	-1	7810	347256	0.022	0.0191747	4.47154	NaN	NaN
192	AAV	CamKIIa	aIC	aIC 1294	1.65	Motor Cortex, secondary	Motor Cortex	-1	9026	390580	0.023	0.0221601	4.6748	NaN	NaN
193	AAV	CamKIIa	aIC	aIC 1294	1.65	Retrosplenial Cortex	Association Cortex	-1	11741	715239	0.016	0.0288258	3.25203	NaN	NaN
194	AAV	CamKIIa	aIC	aIC 1294	1.65	Retrosplenial Cortex	Association Cortex	-1	7743	623908	0.012	0.0190102	2.43902	NaN	NaN
195	AAV	CamKIIa	aIC	aIC 1294	1.65	Caudate Putamen	Striatum	-1	358791	2.75608e+06	0.13	0.880883	26.4228	NaN	NaN
196	AAV	CamKIIa	aIC	aIC 1294	1.65	Central Nucleus of Amygdala	Amygdala	-1	3962	408867	0.01	0.00972727	2.03252	NaN	NaN
197	AAV	CamKIIa	aIC	aIC 1294	1.65	Hypothalamic Lateral Zone	Hypothalamus	-1	4129	1.22297e+06	0.003	0.0101373	0.609756	NaN	NaN
198	AAV	CamKIIa	aIC	aIC 1294	1.65	Intralaminar Nuclei of the Dorsal Thalamus	Thalamus	-1	19963	160032	0.125	0.049012	25.4065	NaN	NaN
199	AAV	CamKIIa	aIC	aIC 1294	1.65	Intralaminar Nuclei of the Dorsal Thalamus	Thalamus	-1	14908	566012	0.026	0.0366013	5.28455	NaN	NaN
200	AAV	CamKIIa	aIC	aIC 1294	1.65	Ventral Group of the Dorsal Thalamus	Thalamus	-1	88866	341899	0.26	0.218179	52.8455	NaN	NaN
201	AAV	CamKIIa	aIC	aIC 1294	1.65	Ventral Group of the Dorsal Thalamus	Thalamus	-1	49508	1.24563e+06	0.04	0.121549	8.13008	NaN	NaN
202	AAV	CamKIIa	aIC	aIC 1294	1.65	Anterodorsal Thalamic Nucleus	Thalamus	-1	29966	263491	0.114	0.0735708	23.1707	NaN	NaN
203	AAV	CamKIIa	aIC	aIC 1294	1.65	Hypothalamic Medial Zone	Hypothalamus	-1	149	425442	0.0003502	0.000365816	0.0711789	NaN	NaN
204	AAV	CamKIIa	aIC	aIC 1294	1.65	Intralaminar Nuclei of the Dorsal Thalamus	Thalamus	-1	16422	588562	0.028	0.0403183	5.69106	NaN	NaN
205	AAV	CamKIIa	aIC	aIC 1294	1.65	Hypothalamic Lateral Zone	Hypothalamus	-1	57	101460	0.0005618	0.000139943	0.114187	NaN	NaN
206	AAV	CamKIIa	aIC	aIC 1294	1.65	Claustrum	Claustrum	-1	11528	138905	0.083	0.0283029	16.8699	NaN	NaN
207	AAV	CamKIIa	aIC	aIC 1294	1.65	Basolateral Nucleus	Amygdala	-1	40148	310749	0.129	0.098569	26.2195	NaN	NaN
208	AAV	CamKIIa	aIC	aIC 1294	1.65	Lateral Amygdala	Amygdala	-1	11752	119452	0.098	0.0288528	19.9187	NaN	NaN
209	AAV	CamKIIa	aIC	aIC 1294	1.65	Globus Pallidus	Pallidum	-1	4921	655980	0.008	0.0120818	1.62602	NaN	NaN
210	AAV	CamKIIa	aIC	aIC 1294	1.65	Intralaminar Nuclei of the Dorsal Thalamus	Thalamus	-1	89899	427171	0.21	0.220715	42.6829	NaN	NaN
211	AAV	CamKIIa	aIC	aIC 1294	1.65	Intralaminar Nuclei of the Dorsal Thalamus	Thalamus	-1	17661	183145	0.096	0.0433603	19.5122	NaN	NaN
212	AAV	CamKIIa	aIC	aIC 1294	1.65	Mediodorsal Thalamic Nuclei	Thalamus	-1	18201	82067.3	0.222	0.044686	45.122	NaN	NaN
213	AAV	CamKIIa	aIC	aIC 1294	1.65	Basolateral Nucleus	Amygdala	-1	2830	81381.3	0.035	0.00694805	7.11382	NaN	NaN
214	AAV	CamKIIa	aIC	aIC 1294	1.65	Extended Amygdala	Amygdala	-1	2135	330933	0.006	0.00524173	1.21951	NaN	NaN
215	AAV	CamKIIa	aIC	aIC 1294	1.65	Medial Amygdala	Amygdala	-1	23	259702	8.86e-05	5.64683e-05	0.0180081	NaN	NaN
216	AAV	CamKIIa	aIC	aIC 1294	1.65	Anterodorsal Thalamic Nucleus	Thalamus	-1	1515	88343.3	0.017	0.00371954	3.45528	NaN	NaN
217	AAV	CamKIIa	aIC	aIC 1294	1.65	Anterodorsal Thalamic Nucleus	Thalamus	-1	90	467661	0.0001924	0.000220963	0.0391057	NaN	NaN
218	AAV	CamKIIa	aIC	aIC 1294	1.65	Piriform-Amygdalar Area	Olfactory areas	-1.2	97	267635	0.0003624	0.000238149	0.0736585	NaN	NaN
219	AAV	CamKIIa	aIC	aIC 1294	1.65	Cortical Amygdala	Amygdala	-1.2	74	250700	0.0002952	0.00018168	0.06	NaN	NaN
220	AAV	CamKIIa	aIC	aIC 1294	1.65	Piriform Area	Piriform Cortex	-1.2	551	1.01677e+06	0.0005419	0.00135278	0.110142	NaN	NaN
221	AAV	CamKIIa	aIC	aIC 1294	1.65	Endopiriform Nucleus	Olfactory areas	-1.2	892	294881	0.003	0.00218999	0.609756	NaN	NaN
222	AAV	CamKIIa	aIC	aIC 1294	1.65	Agranular Insular Cortex, posterior	Insular Cortex	-1.2	77249	481938	0.16	0.189657	32.5203	NaN	NaN
223	AAV	CamKIIa	aIC	aIC 1294	1.65	Dysgranular Insular Cortex	Insular Cortex	-1.2	79211	287260	0.276	0.194474	56.0976	NaN	NaN
224	AAV	CamKIIa	aIC	aIC 1294	1.65	Granular Insular Cortex	Insular Cortex	-1.2	48654	305030	0.16	0.119452	32.5203	NaN	NaN
225	AAV	CamKIIa	aIC	aIC 1294	1.65	Somatosensory Cortex, secondary	Sensory Cortex	-1.2	60829	988736	0.062	0.149344	12.6016	NaN	NaN
226	AAV	CamKIIa	aIC	aIC 1294	1.65	Somatosensory Cortex, primary	Sensory Cortex	-1.2	32967	4.61819e+06	0.007	0.0809387	1.42276	NaN	NaN
227	AAV	CamKIIa	aIC	aIC 1294	1.65	Motor Cortex, primary	Motor Cortex	-1.2	3872	332462	0.012	0.00950631	2.43902	NaN	NaN
228	AAV	CamKIIa	aIC	aIC 1294	1.65	Motor Cortex, secondary	Motor Cortex	-1.2	2723	312478	0.009	0.00668535	1.82927	NaN	NaN
229	AAV	CamKIIa	aIC	aIC 1294	1.65	Retrosplenial Cortex	Association Cortex	-1.2	5921	477357	0.012	0.0145369	2.43902	NaN	NaN
230	AAV	CamKIIa	aIC	aIC 1294	1.65	Retrosplenial Cortex	Association Cortex	-1.2	4293	527394	0.008	0.0105399	1.62602	NaN	NaN
231	AAV	CamKIIa	aIC	aIC 1294	1.65	Caudate Putamen	Striatum	-1.2	120840	2.19474e+06	0.055	0.296679	11.1789	NaN	NaN
232	AAV	CamKIIa	aIC	aIC 1294	1.65	Central Nucleus of Amygdala	Amygdala	-1.2	2332	318060	0.007	0.00572539	1.42276	NaN	NaN
233	AAV	CamKIIa	aIC	aIC 1294	1.65	Hypothalamic Lateral Zone	Hypothalamus	-1.2	595	989535	0.0006013	0.00146081	0.122215	NaN	NaN
234	AAV	CamKIIa	aIC	aIC 1294	1.65	Ventral Group of the Dorsal Thalamus	Thalamus	-1.2	161697	561094	0.288	0.396989	58.5366	NaN	NaN
235	AAV	CamKIIa	aIC	aIC 1294	1.65	Intralaminar Nuclei of the Dorsal Thalamus	Thalamus	-1.2	26679	90422.8	0.295	0.0655007	59.9593	NaN	NaN
236	AAV	CamKIIa	aIC	aIC 1294	1.65	Basolateral Nucleus	Amygdala	-1.2	1492	79662.4	0.019	0.00366307	3.86179	NaN	NaN
237	AAV	CamKIIa	aIC	aIC 1294	1.65	Medial Amygdala	Amygdala	-1.2	31	298132	0.000104	7.61094e-05	0.0211382	NaN	NaN
238	AAV	CamKIIa	aIC	aIC 1294	1.65	Cortical Amygdala	Amygdala	-1.2	234	203354	0.001	0.000574503	0.203252	NaN	NaN
239	AAV	CamKIIa	aIC	aIC 1294	1.65	Central Nucleus of Amygdala	Amygdala	-1.2	129	113786	0.001	0.000316713	0.203252	NaN	NaN
240	AAV	CamKIIa	aIC	aIC 1294	1.65	Basolateral Nucleus	Amygdala	-1.2	2050	810464	0.003	0.00503304	0.609756	NaN	NaN
241	AAV	CamKIIa	aIC	aIC 1294	1.65	Globus Pallidus	Pallidum	-1.2	1805	466079	0.004	0.00443153	0.813008	NaN	NaN
242	AAV	CamKIIa	aIC	aIC 1294	1.65	Basolateral Nucleus	Amygdala	-1.2	9434	327628	0.029	0.0231618	5.89431	NaN	NaN
243	AAV	CamKIIa	aIC	aIC 1294	1.65	Lateral Amygdala	Amygdala	-1.2	858	114072	0.008	0.00210651	1.62602	NaN	NaN
244	AAV	CamKIIa	aIC	aIC 1294	1.65	Intralaminar Nuclei of the Dorsal Thalamus	Thalamus	-1.2	52685	196714	0.268	0.129349	54.4715	NaN	NaN
245	AAV	CamKIIa	aIC	aIC 1294	1.65	Mediodorsal Thalamic Nuclei	Thalamus	-1.2	101827	304747	0.334	0.25	67.8862	NaN	NaN
246	AAV	CamKIIa	aIC	aIC 1294	1.65	Paraventricular Thalamic Nucleus	Thalamus	-1.2	5467	178464	0.031	0.0134223	6.30081	NaN	NaN
247	AAV	CamKIIa	aIC	aIC 1294	1.65	Intralaminar Nuclei of the Dorsal Thalamus	Thalamus	-1.2	6628	334218	0.02	0.0162727	4.06504	NaN	NaN
248	AAV	CamKIIa	aIC	aIC 1294	1.65	Intralaminar Nuclei of the Dorsal Thalamus	Thalamus	-1.2	13808	75481.7	0.183	0.0339006	37.1951	NaN	NaN
249	AAV	CamKIIa	aIC	aIC 1294	1.65	Intralaminar Nuclei of the Dorsal Thalamus	Thalamus	-1.2	912	486353	0.002	0.00223909	0.406504	NaN	NaN
250	AAV	CamKIIa	aIC	aIC 1294	1.65	Hypothalamic Lateral Zone	Hypothalamus	-1.2	976	221996	0.004	0.00239622	0.813008	NaN	NaN
251	AAV	CamKIIa	aIC	aIC 1294	1.65	Hypothalamic Medial Zone	Hypothalamus	-1.2	480	292699	0.002	0.00117847	0.406504	NaN	NaN
252	AAV	CamKIIa	aIC	aIC 1294	1.65	Mediodorsal Thalamic Nuclei	Thalamus	-1.2	36197	198697	0.182	0.0888688	36.9919	NaN	NaN
253	AAV	CamKIIa	aIC	aIC 1294	1.65	Ventral Group of the Dorsal Thalamus	Thalamus	-1.2	13750	1.33807e+06	0.01	0.0337582	2.03252	NaN	NaN
254	AAV	CamKIIa	aIC	aIC 1294	1.65	Lateral Amygdala	Amygdala	-1.3	598	160179	0.004	0.00146817	0.813008	NaN	NaN
255	AAV	CamKIIa	aIC	aIC 1294	1.65	Piriform-Amygdalar Area	Olfactory areas	-1.3	50	153851	0.000325	0.000122757	0.0660569	NaN	NaN
256	AAV	CamKIIa	aIC	aIC 1294	1.65	Cortical Amygdala	Amygdala	-1.3	50	173025	0.000289	0.000122757	0.0587398	NaN	NaN
257	AAV	CamKIIa	aIC	aIC 1294	1.65	Cortical Amygdala	Amygdala	-1.3	14	176118	7.95e-05	3.4372e-05	0.0161585	NaN	NaN
258	AAV	CamKIIa	aIC	aIC 1294	1.65	Medial Amygdala	Amygdala	-1.3	23	418418	5.5e-05	5.64683e-05	0.0111789	NaN	NaN
259	AAV	CamKIIa	aIC	aIC 1294	1.65	Piriform Area	Piriform Cortex	-1.3	379	1.10241e+06	0.0003438	0.000930499	0.069878	NaN	NaN
260	AAV	CamKIIa	aIC	aIC 1294	1.65	Retrosplenial Cortex	Association Cortex	-1.3	7021	486330	0.014	0.0172375	2.84553	NaN	NaN
261	AAV	CamKIIa	aIC	aIC 1294	1.65	Retrosplenial Cortex	Association Cortex	-1.3	14288	656276	0.022	0.0350791	4.47154	NaN	NaN
262	AAV	CamKIIa	aIC	aIC 1294	1.65	Motor Cortex, secondary	Motor Cortex	-1.3	5704	345102	0.017	0.0140041	3.45528	NaN	NaN
263	AAV	CamKIIa	aIC	aIC 1294	1.65	Motor Cortex, primary	Motor Cortex	-1.3	4524	351542	0.013	0.0111071	2.64228	NaN	NaN
264	AAV	CamKIIa	aIC	aIC 1294	1.65	Somatosensory Cortex, secondary	Sensory Cortex	-1.3	34510	944479	0.037	0.0847269	7.52033	NaN	NaN
265	AAV	CamKIIa	aIC	aIC 1294	1.65	Somatosensory Cortex, primary	Sensory Cortex	-1.3	29275	4.14058e+06	0.007	0.0718743	1.42276	NaN	NaN
266	AAV	CamKIIa	aIC	aIC 1294	1.65	Basolateral Nucleus	Amygdala	-1.3	6862	438055	0.016	0.0168472	3.25203	NaN	NaN
267	AAV	CamKIIa	aIC	aIC 1294	1.65	Basolateral Nucleus	Amygdala	-1.3	109	82878.8	0.001	0.00026761	0.203252	NaN	NaN
268	AAV	CamKIIa	aIC	aIC 1294	1.65	Perirhinal Cortex	Association Cortex	-1.3	107939	655753	0.165	0.265006	33.5366	NaN	NaN
269	AAV	CamKIIa	aIC	aIC 1294	1.65	Basomedial Nucleus	Amygdala	-1.3	48	454539	0.0001056	0.000117847	0.0214634	NaN	NaN
270	AAV	CamKIIa	aIC	aIC 1294	1.65	Central Nucleus of Amygdala	Amygdala	-1.3	83	251110	0.0003305	0.000203777	0.0671748	NaN	NaN
271	AAV	CamKIIa	aIC	aIC 1294	1.65	Central Nucleus of Amygdala	Amygdala	-1.3	163	254167	0.0006413	0.000400188	0.130346	NaN	NaN
272	AAV	CamKIIa	aIC	aIC 1294	1.65	Hypothalamic Lateral Zone	Hypothalamus	-1.3	721	968069	0.0007448	0.00177016	0.151382	NaN	NaN
273	AAV	CamKIIa	aIC	aIC 1294	1.65	Posterior Complex of the Thalamus	Thalamus	-1.3	214	340700	0.0006281	0.0005254	0.127663	NaN	NaN
274	AAV	CamKIIa	aIC	aIC 1294	1.65	Visual Cortex, primary	Sensory Cortex	-1.3	19	322601	5.89e-05	4.66477e-05	0.0119715	NaN	NaN
275	AAV	CamKIIa	aIC	aIC 1294	1.65	Hypothalamic Lateral Zone	Hypothalamus	-1.3	360	160638	0.002	0.000883851	0.406504	NaN	NaN
276	AAV	CamKIIa	aIC	aIC 1294	1.65	Hypothalamic Lateral Zone	Hypothalamus	-1.3	500	246386	0.002	0.00122757	0.406504	NaN	NaN
277	AAV	CamKIIa	aIC	aIC 1294	1.65	Intralaminar Nuclei of the Dorsal Thalamus	Thalamus	-1.3	10439	191520	0.055	0.0256292	11.1789	NaN	NaN
278	AAV	CamKIIa	aIC	aIC 1294	1.65	Ventral Group of the Dorsal Thalamus	Thalamus	-1.3	119162	380270	0.313	0.29256	63.6179	NaN	NaN
279	AAV	CamKIIa	aIC	aIC 1294	1.65	Intralaminar Nuclei of the Dorsal Thalamus	Thalamus	-1.3	80350	174205	0.461	0.197271	93.6992	NaN	NaN
280	AAV	CamKIIa	aIC	aIC 1294	1.65	Mediodorsal Thalamic Nuclei	Thalamus	-1.3	121841	354292	0.344	0.299137	69.9187	NaN	NaN
281	AAV	CamKIIa	aIC	aIC 1294	1.65	Intralaminar Nuclei of the Dorsal Thalamus	Thalamus	-1.3	3233	234495	0.014	0.00793747	2.84553	NaN	NaN
282	AAV	CamKIIa	aIC	aIC 1294	1.65	Ectorhinal Cortex	Association Cortex	-1.3	92407	648512	0.142	0.226872	28.8618	NaN	NaN
283	AAV	CamKIIa	aIC	aIC 1294	1.65	Endopiriform Nucleus	Olfactory areas	-1.3	1181	304788	0.004	0.00289952	0.813008	NaN	NaN
284	AAV	CamKIIa	aIC	aIC 1294	1.65	Caudate Putamen	Striatum	-1.3	54028	1.58351e+06	0.034	0.132646	6.91057	NaN	NaN
285	AAV	CamKIIa	aIC	aIC 1294	1.65	Globus Pallidus	Pallidum	-1.3	967	592005	0.002	0.00237412	0.406504	NaN	NaN
286	AAV	CamKIIa	aIC	aIC 1294	1.65	Intralaminar Nuclei of the Dorsal Thalamus	Thalamus	-1.3	390	492302	0.0007922	0.000957505	0.161016	NaN	NaN
287	AAV	CamKIIa	aIC	aIC 1294	1.65	Ventral Pallidum	Pallidum	-1.3	6050	1.12881e+06	0.005	0.0148536	1.01626	NaN	NaN
288	AAV	CamKIIa	aIC	aIC 1294	1.65	Ventral Group of the Dorsal Thalamus	Thalamus	-1.3	108109	554932	0.195	0.265423	39.6341	NaN	NaN
289	AAV	CamKIIa	aIC	aIC 1294	1.65	Intralaminar Nuclei of the Dorsal Thalamus	Thalamus	-1.3	83541	180710	0.462	0.205105	93.9024	NaN	NaN
290	AAV	CamKIIa	aIC	aIC 1294	1.65	Intralaminar Nuclei of the Dorsal Thalamus	Thalamus	-1.3	38149	80079.9	0.476	0.0936612	96.748	NaN	NaN
291	AAV	CamKIIa	aIC	aIC 1294	1.65	Piriform-Amygdalar Area	Olfactory areas	-1.4	5	173306	2.89e-05	1.22757e-05	0.00587398	NaN	NaN
292	AAV	CamKIIa	aIC	aIC 1294	1.65	Piriform Area	Piriform Cortex	-1.4	818	937885	0.0008722	0.00200831	0.177276	NaN	NaN
293	AAV	CamKIIa	aIC	aIC 1294	1.65	Endopiriform Nucleus	Olfactory areas	-1.4	1100	270202	0.004	0.00270066	0.813008	NaN	NaN
294	AAV	CamKIIa	aIC	aIC 1294	1.65	Somatosensory Cortex, secondary	Sensory Cortex	-1.4	40989	1.11692e+06	0.037	0.100634	7.52033	NaN	NaN
295	AAV	CamKIIa	aIC	aIC 1294	1.65	Somatosensory Cortex, primary	Sensory Cortex	-1.4	35039	4.15831e+06	0.008	0.0860257	1.62602	NaN	NaN
296	AAV	CamKIIa	aIC	aIC 1294	1.65	Retrosplenial Cortex	Association Cortex	-1.4	12062	563139	0.021	0.0296139	4.26829	NaN	NaN
297	AAV	CamKIIa	aIC	aIC 1294	1.65	Retrosplenial Cortex	Association Cortex	-1.4	6975	506784	0.014	0.0171246	2.84553	NaN	NaN
298	AAV	CamKIIa	aIC	aIC 1294	1.65	Caudate Putamen	Striatum	-1.4	33164	2.11297e+06	0.016	0.0814223	3.25203	NaN	NaN
299	AAV	CamKIIa	aIC	aIC 1294	1.65	Ventral Group of the Dorsal Thalamus	Thalamus	-1.4	124331	369978	0.336	0.30525	68.2927	NaN	NaN
300	AAV	CamKIIa	aIC	aIC 1294	1.65	Basolateral Nucleus	Amygdala	-1.4	91	78745.1	0.001	0.000223418	0.203252	NaN	NaN
301	AAV	CamKIIa	aIC	aIC 1294	1.65	Globus Pallidus	Pallidum	-1.4	62	514184	0.0001206	0.000152219	0.0245122	NaN	NaN
302	AAV	CamKIIa	aIC	aIC 1294	1.65	Lateral Amygdala	Amygdala	-1.4	206	124188	0.002	0.000505759	0.406504	NaN	NaN
303	AAV	CamKIIa	aIC	aIC 1294	1.65	Mediodorsal Thalamic Nuclei	Thalamus	-1.4	134702	463643	0.291	0.330712	59.1463	NaN	NaN
304	AAV	CamKIIa	aIC	aIC 1294	1.65	Intralaminar Nuclei of the Dorsal Thalamus	Thalamus	-1.4	258	401885	0.000642	0.000633427	0.130488	NaN	NaN
305	AAV	CamKIIa	aIC	aIC 1294	1.65	Hypothalamic Lateral Zone	Hypothalamus	-1.4	2477	451158	0.005	0.00608139	1.01626	NaN	NaN
306	AAV	CamKIIa	aIC	aIC 1294	1.65	Ventral Group of the Dorsal Thalamus	Thalamus	-1.4	56594	516536	0.11	0.138946	22.3577	NaN	NaN
307	AAV	CamKIIa	aIC	aIC 1294	1.65	Parietal Cortex	Association Cortex	-1.4	7030	568138	0.012	0.0172596	2.43902	NaN	NaN
308	AAV	CamKIIa	aIC	aIC 1294	1.65	Perirhinal Cortex	Association Cortex	-1.4	88660	591229	0.15	0.217673	30.4878	NaN	NaN
309	AAV	CamKIIa	aIC	aIC 1294	1.65	Ectorhinal Cortex	Association Cortex	-1.4	75619	593724	0.127	0.185655	25.813	NaN	NaN
310	AAV	CamKIIa	aIC	aIC 1294	1.65	Basolateral Nucleus	Amygdala	-1.4	1999	319800	0.006	0.00490783	1.21951	NaN	NaN
311	AAV	CamKIIa	aIC	aIC 1294	1.65	Central Nucleus of Amygdala	Amygdala	-1.4	559	272268	0.002	0.00137242	0.406504	NaN	NaN
312	AAV	CamKIIa	aIC	aIC 1294	1.65	Basomedial Nucleus	Amygdala	-1.4	57	356582	0.0001599	0.000139943	0.0325	NaN	NaN
313	AAV	CamKIIa	aIC	aIC 1294	1.65	Ventral Pallidum	Pallidum	-1.4	4255	665364	0.006	0.0104466	1.21951	NaN	NaN
314	AAV	CamKIIa	aIC	aIC 1294	1.65	Intralaminar Nuclei of the Dorsal Thalamus	Thalamus	-1.4	93029	195716	0.475	0.228399	96.5447	NaN	NaN
315	AAV	CamKIIa	aIC	aIC 1294	1.65	Intralaminar Nuclei of the Dorsal Thalamus	Thalamus	-1.4	13089	115583	0.113	0.0321353	22.9675	NaN	NaN
316	AAV	CamKIIa	aIC	aIC 1294	1.65	Intralaminar Nuclei of the Dorsal Thalamus	Thalamus	-1.4	56689	122694	0.462	0.13918	93.9024	NaN	NaN
317	AAV	CamKIIa	aIC	aIC 1294	1.65	Mediodorsal Thalamic Nuclei	Thalamus	-1.4	92577	196606	0.471	0.22729	95.7317	NaN	NaN
318	AAV	CamKIIa	aIC	aIC 1294	1.65	Intralaminar Nuclei of the Dorsal Thalamus	Thalamus	-1.4	8577	174583	0.049	0.0210577	9.95935	NaN	NaN
319	AAV	CamKIIa	aIC	aIC 1294	1.65	Paraventricular Thalamic Nucleus	Thalamus	-1.4	5394	224440	0.024	0.013243	4.87805	NaN	NaN
320	AAV	CamKIIa	aIC	aIC 1294	1.65	Posterior Complex of the Thalamus	Thalamus	-1.4	1898	347048	0.005	0.00465986	1.01626	NaN	NaN
321	AAV	CamKIIa	aIC	aIC 1294	1.65	Piriform-Amygdalar Area	Olfactory areas	-1.6	37	173306	0.0002135	9.08402e-05	0.0433943	NaN	NaN
322	AAV	CamKIIa	aIC	aIC 1294	1.65	Piriform Area	Piriform Cortex	-1.6	240	937885	0.0002559	0.000589234	0.0520122	NaN	NaN
323	AAV	CamKIIa	aIC	aIC 1294	1.65	Endopiriform Nucleus	Olfactory areas	-1.6	266	270202	0.0009844	0.000653068	0.200081	NaN	NaN
324	AAV	CamKIIa	aIC	aIC 1294	1.65	Somatosensory Cortex, secondary	Sensory Cortex	-1.6	8764	1.11692e+06	0.008	0.0215169	1.62602	NaN	NaN
325	AAV	CamKIIa	aIC	aIC 1294	1.65	Somatosensory Cortex, primary	Sensory Cortex	-1.6	8203	4.09677e+06	0.002	0.0201395	0.406504	NaN	NaN
326	AAV	CamKIIa	aIC	aIC 1294	1.65	Retrosplenial Cortex	Association Cortex	-1.6	1365	542694	0.003	0.00335127	0.609756	NaN	NaN
327	AAV	CamKIIa	aIC	aIC 1294	1.65	Retrosplenial Cortex	Association Cortex	-1.6	1812	506784	0.004	0.00444872	0.813008	NaN	NaN
328	AAV	CamKIIa	aIC	aIC 1294	1.65	Caudate Putamen	Striatum	-1.6	5948	1.79334e+06	0.003	0.0146032	0.609756	NaN	NaN
329	AAV	CamKIIa	aIC	aIC 1294	1.65	Ventral Group of the Dorsal Thalamus	Thalamus	-1.6	84881	297938	0.285	0.208395	57.9268	NaN	NaN
330	AAV	CamKIIa	aIC	aIC 1294	1.65	Basolateral Nucleus	Amygdala	-1.6	44	78745.1	0.0005588	0.000108026	0.113577	NaN	NaN
331	AAV	CamKIIa	aIC	aIC 1294	1.65	Lateral Amygdala	Amygdala	-1.6	93	124188	0.0007489	0.000228328	0.152215	NaN	NaN
332	AAV	CamKIIa	aIC	aIC 1294	1.65	Mediodorsal Thalamic Nuclei	Thalamus	-1.6	106139	270032	0.393	0.260586	79.878	NaN	NaN
333	AAV	CamKIIa	aIC	aIC 1294	1.65	Intralaminar Nuclei of the Dorsal Thalamus	Thalamus	-1.6	11	401885	2.74e-05	2.70066e-05	0.00556911	NaN	NaN
334	AAV	CamKIIa	aIC	aIC 1294	1.65	Hypothalamic Lateral Zone	Hypothalamus	-1.6	1727	483339	0.004	0.00424003	0.813008	NaN	NaN
335	AAV	CamKIIa	aIC	aIC 1294	1.65	Ventral Group of the Dorsal Thalamus	Thalamus	-1.6	59886	520791	0.115	0.147029	23.374	NaN	NaN
336	AAV	CamKIIa	aIC	aIC 1294	1.65	Parietal Cortex	Association Cortex	-1.6	2794	476363	0.006	0.00685967	1.21951	NaN	NaN
337	AAV	CamKIIa	aIC	aIC 1294	1.65	Perirhinal Cortex	Association Cortex	-1.6	21113	591229	0.036	0.0518354	7.31707	NaN	NaN
338	AAV	CamKIIa	aIC	aIC 1294	1.65	Ectorhinal Cortex	Association Cortex	-1.6	34215	593724	0.058	0.0840027	11.7886	NaN	NaN
339	AAV	CamKIIa	aIC	aIC 1294	1.65	Basolateral Nucleus	Amygdala	-1.6	548	319800	0.002	0.00134542	0.406504	NaN	NaN
340	AAV	CamKIIa	aIC	aIC 1294	1.65	Basomedial Nucleus	Amygdala	-1.6	10	356582	2.8e-05	2.45514e-05	0.00569106	NaN	NaN
341	AAV	CamKIIa	aIC	aIC 1294	1.65	Ventral Pallidum	Pallidum	-1.6	883	768553	0.001	0.00216789	0.203252	NaN	NaN
342	AAV	CamKIIa	aIC	aIC 1294	1.65	Intralaminar Nuclei of the Dorsal Thalamus	Thalamus	-1.6	36357	126040	0.288	0.0892616	58.5366	NaN	NaN
343	AAV	CamKIIa	aIC	aIC 1294	1.65	Intralaminar Nuclei of the Dorsal Thalamus	Thalamus	-1.6	24392	62228.2	0.392	0.0598858	79.6748	NaN	NaN
344	AAV	CamKIIa	aIC	aIC 1294	1.65	Mediodorsal Thalamic Nuclei	Thalamus	-1.6	43603	124756	0.35	0.107052	71.1382	NaN	NaN
345	AAV	CamKIIa	aIC	aIC 1294	1.65	Intralaminar Nuclei of the Dorsal Thalamus	Thalamus	-1.6	130	174583	0.0007446	0.000319168	0.151341	NaN	NaN
346	AAV	CamKIIa	aIC	aIC 1294	1.65	Paraventricular Thalamic Nucleus	Thalamus	-1.6	2092	224440	0.009	0.00513616	1.82927	NaN	NaN
347	AAV	CamKIIa	aIC	aIC 1294	1.65	Intralaminar Nuclei of the Dorsal Thalamus	Thalamus	-1.6	42495	89440.9	0.475	0.104331	96.5447	NaN	NaN
348	AAV	CamKIIa	aIC	aIC 1294	1.65	Posterior Complex of the Thalamus	Thalamus	-1.6	622	277448	0.002	0.0015271	0.406504	NaN	NaN
349	AAV	CamKIIa	aIC	aIC 1294	1.65	Habenular Nuclei	Hypothalamus	-1.6	144	148335	0.0009708	0.00035354	0.197317	NaN	NaN
350	AAV	CamKIIa	aIC	aIC 1294	1.65	Piriform Area	Piriform Cortex	-1.9	163	1.05039e+06	0.0001552	0.000400188	0.0315447	NaN	NaN
351	AAV	CamKIIa	aIC	aIC 1294	1.65	Somatosensory Cortex, secondary	Sensory Cortex	-1.9	2123	1.03392e+06	0.002	0.00521227	0.406504	NaN	NaN
352	AAV	CamKIIa	aIC	aIC 1294	1.65	Retrosplenial Cortex	Association Cortex	-1.9	1395	557010	0.003	0.00342492	0.609756	NaN	NaN
353	AAV	CamKIIa	aIC	aIC 1294	1.65	Retrosplenial Cortex	Association Cortex	-1.9	843	506784	0.002	0.00206968	0.406504	NaN	NaN
354	AAV	CamKIIa	aIC	aIC 1294	1.65	Caudate Putamen	Striatum	-1.9	1330	1.38686e+06	0.000959	0.00326534	0.194919	NaN	NaN
355	AAV	CamKIIa	aIC	aIC 1294	1.65	Ventral Group of the Dorsal Thalamus	Thalamus	-1.9	29853	323659	0.092	0.0732933	18.6992	NaN	NaN
356	AAV	CamKIIa	aIC	aIC 1294	1.65	Basolateral Nucleus	Amygdala	-1.9	151	81949.7	0.002	0.000370726	0.406504	NaN	NaN
357	AAV	CamKIIa	aIC	aIC 1294	1.65	Lateral Amygdala	Amygdala	-1.9	3	145975	2.06e-05	7.36542e-06	0.00418699	NaN	NaN
358	AAV	CamKIIa	aIC	aIC 1294	1.65	Hypothalamic Lateral Zone	Hypothalamus	-1.9	1459	694427	0.002	0.00358205	0.406504	NaN	NaN
359	AAV	CamKIIa	aIC	aIC 1294	1.65	Parietal Cortex	Association Cortex	-1.9	1047	476363	0.002	0.00257053	0.406504	NaN	NaN
360	AAV	CamKIIa	aIC	aIC 1294	1.65	Perirhinal Cortex	Association Cortex	-1.9	14755	565504	0.026	0.0362256	5.28455	NaN	NaN
361	AAV	CamKIIa	aIC	aIC 1294	1.65	Ectorhinal Cortex	Association Cortex	-1.9	15184	488335	0.031	0.0372789	6.30081	NaN	NaN
362	AAV	CamKIIa	aIC	aIC 1294	1.65	Intralaminar Nuclei of the Dorsal Thalamus	Thalamus	-1.9	17163	106405	0.161	0.0421376	32.7236	NaN	NaN
363	AAV	CamKIIa	aIC	aIC 1294	1.65	Intralaminar Nuclei of the Dorsal Thalamus	Thalamus	-1.9	3189	157767	0.02	0.00782945	4.06504	NaN	NaN
364	AAV	CamKIIa	aIC	aIC 1294	1.65	Somatosensory Cortex, primary	Sensory Cortex	-1.9	3044	2.90926e+06	0.001	0.00747345	0.203252	NaN	NaN
365	AAV	CamKIIa	aIC	aIC 1294	1.65	Auditory Cortex, secondary or higher	Sensory Cortex	-1.9	2989	850391	0.004	0.00733842	0.813008	NaN	NaN
366	AAV	CamKIIa	aIC	aIC 1294	1.65	Temporal Association Cortex	Association Cortex	-1.9	3140	306125	0.01	0.00770914	2.03252	NaN	NaN
367	AAV	CamKIIa	aIC	aIC 1294	1.65	Amygdalopiriform Transition Area	Amygdala	-1.9	73	161924	0.0004508	0.000179225	0.091626	NaN	NaN
368	AAV	CamKIIa	aIC	aIC 1294	1.65	Basolateral Nucleus	Amygdala	-1.9	101	312760	0.0003229	0.000247969	0.0656301	NaN	NaN
369	AAV	CamKIIa	aIC	aIC 1294	1.65	Endopiriform Nucleus	Olfactory areas	-1.9	226	174525	0.001	0.000554862	0.203252	NaN	NaN
370	AAV	CamKIIa	aIC	aIC 1294	1.65	Substantia Nigra	Midbrain	-1.9	8041	782535	0.01	0.0197418	2.03252	NaN	NaN
371	AAV	CamKIIa	aIC	aIC 1294	1.65	Ventral Group of the Dorsal Thalamus	Thalamus	-1.9	32693	110413	0.296	0.0802659	60.1626	NaN	NaN
372	AAV	CamKIIa	aIC	aIC 1294	1.65	Mediodorsal Thalamic Nuclei	Thalamus	-1.9	47734	182427	0.262	0.117194	53.252	NaN	NaN
373	AAV	CamKIIa	aIC	aIC 1294	1.65	Ventral Pallidum	Pallidum	-1.9	5849	758163	0.008	0.0143601	1.62602	NaN	NaN
374	AAV	CamKIIa	aIC	aIC 1294	1.65	Posterior Complex of the Thalamus	Thalamus	-1.9	13724	740429	0.019	0.0336944	3.86179	NaN	NaN
375	AAV	CamKIIa	aIC	aIC 1294	1.65	Intralaminar Nuclei of the Dorsal Thalamus	Thalamus	-1.9	265	115213	0.002	0.000650613	0.406504	NaN	NaN
376	AAV	CamKIIa	aIC	aIC 1294	1.65	Intralaminar Nuclei of the Dorsal Thalamus	Thalamus	-1.9	37054	114441	0.324	0.0909728	65.8537	NaN	NaN
377	AAV	CamKIIa	aIC	aIC 1294	1.65	Piriform Area	Piriform Cortex	-2	322	898730	0.0003583	0.000790556	0.0728252	NaN	NaN
378	AAV	CamKIIa	aIC	aIC 1294	1.65	Auditory Cortex, secondary or higher	Sensory Cortex	-2	2056	1.32453e+06	0.002	0.00504777	0.406504	NaN	NaN
379	AAV	CamKIIa	aIC	aIC 1294	1.65	Retrosplenial Cortex	Association Cortex	-2	1978	557010	0.004	0.00485627	0.813008	NaN	NaN
380	AAV	CamKIIa	aIC	aIC 1294	1.65	Retrosplenial Cortex	Association Cortex	-2	579	506784	0.001	0.00142153	0.203252	NaN	NaN
381	AAV	CamKIIa	aIC	aIC 1294	1.65	Ventral Group of the Dorsal Thalamus	Thalamus	-2	21068	264565	0.08	0.0517249	16.2602	NaN	NaN
382	AAV	CamKIIa	aIC	aIC 1294	1.65	Basolateral Nucleus	Amygdala	-2	14	75223	0.0001861	3.4372e-05	0.0378252	NaN	NaN
383	AAV	CamKIIa	aIC	aIC 1294	1.65	Hypothalamic Lateral Zone	Hypothalamus	-2	5916	487537	0.012	0.0145246	2.43902	NaN	NaN
384	AAV	CamKIIa	aIC	aIC 1294	1.65	Parietal Cortex	Association Cortex	-2	2332	1.88313e+06	0.001	0.00572539	0.203252	NaN	NaN
385	AAV	CamKIIa	aIC	aIC 1294	1.65	Ectorhinal Cortex	Association Cortex	-2	4320	349461	0.012	0.0106062	2.43902	NaN	NaN
386	AAV	CamKIIa	aIC	aIC 1294	1.65	Intralaminar Nuclei of the Dorsal Thalamus	Thalamus	-2	7069	187265	0.038	0.0173554	7.72358	NaN	NaN
387	AAV	CamKIIa	aIC	aIC 1294	1.65	Intralaminar Nuclei of the Dorsal Thalamus	Thalamus	-2	882	157767	0.006	0.00216543	1.21951	NaN	NaN
388	AAV	CamKIIa	aIC	aIC 1294	1.65	Somatosensory Cortex, primary	Sensory Cortex	-2	1451	1.38726e+06	0.001	0.00356241	0.203252	NaN	NaN
389	AAV	CamKIIa	aIC	aIC 1294	1.65	Auditory Cortex, secondary or higher	Sensory Cortex	-2	2496	833378	0.003	0.00612803	0.609756	NaN	NaN
390	AAV	CamKIIa	aIC	aIC 1294	1.65	Temporal Association Cortex	Association Cortex	-2	1207	367019	0.003	0.00296336	0.609756	NaN	NaN
391	AAV	CamKIIa	aIC	aIC 1294	1.65	Substantia Nigra	Midbrain	-2	69548	693034	0.1	0.17075	20.3252	NaN	NaN
392	AAV	CamKIIa	aIC	aIC 1294	1.65	Ventral Group of the Dorsal Thalamus	Thalamus	-2	74740	272113	0.275	0.183497	55.8943	NaN	NaN
393	AAV	CamKIIa	aIC	aIC 1294	1.65	Mediodorsal Thalamic Nuclei	Thalamus	-2	7823	182427	0.043	0.0192066	8.73984	NaN	NaN
394	AAV	CamKIIa	aIC	aIC 1294	1.65	Ventral Pallidum	Pallidum	-2	7373	794248	0.009	0.0181018	1.82927	NaN	NaN
395	AAV	CamKIIa	aIC	aIC 1294	1.65	Posterior Complex of the Thalamus	Thalamus	-2	5392	578472	0.009	0.0132381	1.82927	NaN	NaN
396	AAV	CamKIIa	aIC	aIC 1294	1.65	Intralaminar Nuclei of the Dorsal Thalamus	Thalamus	-2	9569	114441	0.084	0.0234932	17.0732	NaN	NaN
397	AAV	CamKIIa	aIC	aIC 1294	1.65	Hypothalamic Lateral Zone	Hypothalamus	-2	19125	304926	0.063	0.0469546	12.8049	NaN	NaN
398	AAV	CamKIIa	aIC	aIC 1294	1.65	Perirhinal Cortex	Association Cortex	-2	9076	288179	0.031	0.0222829	6.30081	NaN	NaN
399	AAV	CamKIIa	aIC	aIC 1294	1.65	Habenular Nuclei	Hypothalamus	-2	218	160562	0.001	0.000535221	0.203252	NaN	NaN
400	AAV	CamKIIa	aIC	aIC 1294	1.65	Entorhinal Cortex	Association Cortex	-2	4420	247888	0.018	0.0108517	3.65854	NaN	NaN
401	AAV	CamKIIa	aIC	aIC 1294	1.65	Basolateral Nucleus	Amygdala	-2	436	324390	0.001	0.00107044	0.203252	NaN	NaN
402	AAV	CamKIIa	aIC	aIC 1294	1.65	Lateral Amygdala	Amygdala	-2	63	269893	0.0002334	0.000154674	0.047439	NaN	NaN
403	AAV	CamKIIa	aIC	aIC 1294	1.65	Caudate Putamen	Striatum	-2	1213	1.23854e+06	0.0009794	0.00297809	0.199065	NaN	NaN
404	AAV	CamKIIa	aIC	aIC 1294	1.65	Piriform Area	Piriform Cortex	-2.2	1046	864877	0.001	0.00256808	0.203252	NaN	NaN
405	AAV	CamKIIa	aIC	aIC 1294	1.65	Auditory Cortex, secondary or higher	Sensory Cortex	-2.2	1856	1.54483e+06	0.001	0.00455674	0.203252	NaN	NaN
406	AAV	CamKIIa	aIC	aIC 1294	1.65	Retrosplenial Cortex	Association Cortex	-2.2	777	387018	0.002	0.00190764	0.406504	NaN	NaN
407	AAV	CamKIIa	aIC	aIC 1294	1.65	Retrosplenial Cortex	Association Cortex	-2.2	480	429099	0.001	0.00117847	0.203252	NaN	NaN
408	AAV	CamKIIa	aIC	aIC 1294	1.65	Basolateral Nucleus	Amygdala	-2.2	50	75222.8	0.0006647	0.000122757	0.135102	NaN	NaN
409	AAV	CamKIIa	aIC	aIC 1294	1.65	Hypothalamic Lateral Zone	Hypothalamus	-2.2	402	571154	0.0007038	0.000986967	0.143049	NaN	NaN
410	AAV	CamKIIa	aIC	aIC 1294	1.65	Ectorhinal Cortex	Association Cortex	-2.2	805	258922	0.003	0.00197639	0.609756	NaN	NaN
411	AAV	CamKIIa	aIC	aIC 1294	1.65	Somatosensory Cortex, primary	Sensory Cortex	-2.2	897	1.37468e+06	0.0006525	0.00220226	0.132622	NaN	NaN
412	AAV	CamKIIa	aIC	aIC 1294	1.65	Auditory Cortex, secondary or higher	Sensory Cortex	-2.2	615	549292	0.001	0.00150991	0.203252	NaN	NaN
413	AAV	CamKIIa	aIC	aIC 1294	1.65	Temporal Association Cortex	Association Cortex	-2.2	356	307930	0.001	0.00087403	0.203252	NaN	NaN
414	AAV	CamKIIa	aIC	aIC 1294	1.65	Substantia Nigra	Midbrain	-2.2	42227	591963	0.071	0.103673	14.4309	NaN	NaN
415	AAV	CamKIIa	aIC	aIC 1294	1.65	Ventral Group of the Dorsal Thalamus	Thalamus	-2.2	36490	255290	0.143	0.0895881	29.065	NaN	NaN
416	AAV	CamKIIa	aIC	aIC 1294	1.65	Ventral Pallidum	Pallidum	-2.2	1291	685606	0.002	0.00316959	0.406504	NaN	NaN
417	AAV	CamKIIa	aIC	aIC 1294	1.65	Posterior Complex of the Thalamus	Thalamus	-2.2	760	782307	0.0009715	0.00186591	0.197459	NaN	NaN
418	AAV	CamKIIa	aIC	aIC 1294	1.65	Hypothalamic Lateral Zone	Hypothalamus	-2.2	42539	281389	0.151	0.104439	30.6911	NaN	NaN
419	AAV	CamKIIa	aIC	aIC 1294	1.65	Perirhinal Cortex	Association Cortex	-2.2	1790	302642	0.006	0.0043947	1.21951	NaN	NaN
420	AAV	CamKIIa	aIC	aIC 1294	1.65	Entorhinal Cortex	Association Cortex	-2.2	5129	382371	0.013	0.0125924	2.64228	NaN	NaN
421	AAV	CamKIIa	aIC	aIC 1294	1.65	Basolateral Nucleus	Amygdala	-2.2	79	391657	0.0002017	0.000193956	0.0409959	NaN	NaN
422	AAV	CamKIIa	aIC	aIC 1294	1.65	Lateral Amygdala	Amygdala	-2.2	129	273714	0.0004713	0.000316713	0.0957927	NaN	NaN
423	AAV	CamKIIa	aIC	aIC 1294	1.65	Endopiriform Nucleus	Olfactory areas	-2.2	759	194773	0.004	0.00186345	0.813008	NaN	NaN
424	AAV	CamKIIa	aIC	aIC 1294	1.65	Visual Cortex, primary	Sensory Cortex	-2.2	2095	1.65831e+06	0.001	0.00514352	0.203252	NaN	NaN
425	AAV	CamKIIa	aIC	aIC 1294	1.65	Ventral Group of the Dorsal Thalamus	Thalamus	-2.2	4217	211116	0.02	0.0103533	4.06504	NaN	NaN
426	AAV	CamKIIa	aIC	aIC 1294	1.65	Intralaminar Nuclei of the Dorsal Thalamus	Thalamus	-2.2	4782	740059	0.006	0.0117405	1.21951	NaN	NaN
427	AAV	CamKIIa	aIC	aIC 1294	1.65	Hypothalamic Lateral Zone	Hypothalamus	-2.2	1660	838668	0.002	0.00407553	0.406504	NaN	NaN
428	AAV	CamKIIa	aIC	aIC 1294	1.65	Posterior Complex of the Thalamus	Thalamus	-2.2	1669	145977	0.011	0.00409763	2.23577	NaN	NaN
429	AAV	CamKIIa	aIC	aIC 1294	1.65	Paraventricular Thalamic Nucleus	Midbrain	-2.2	709	214694	0.003	0.0017407	0.609756	NaN	NaN
430	AAV	CamKIIa	aIC	aIC 1294	1.65	Auditory Cortex, secondary or higher	Sensory Cortex	-2.4	1708	1.54483e+06	0.001	0.00419338	0.203252	NaN	NaN
431	AAV	CamKIIa	aIC	aIC 1294	1.65	Retrosplenial Cortex	Association Cortex	-2.4	664	331128	0.002	0.00163021	0.406504	NaN	NaN
432	AAV	CamKIIa	aIC	aIC 1294	1.65	Retrosplenial Cortex	Association Cortex	-2.4	838	377167	0.002	0.00205741	0.406504	NaN	NaN
433	AAV	CamKIIa	aIC	aIC 1294	1.65	Hypothalamic Lateral Zone	Hypothalamus	-2.4	220	571154	0.0003852	0.000540131	0.0782927	NaN	NaN
434	AAV	CamKIIa	aIC	aIC 1294	1.65	Ectorhinal Cortex	Association Cortex	-2.4	863	340052	0.003	0.00211879	0.609756	NaN	NaN
435	AAV	CamKIIa	aIC	aIC 1294	1.65	Auditory Cortex, secondary or higher	Sensory Cortex	-2.4	823	549292	0.001	0.00202058	0.203252	NaN	NaN
436	AAV	CamKIIa	aIC	aIC 1294	1.65	Temporal Association Cortex	Association Cortex	-2.4	733	307930	0.002	0.00179962	0.406504	NaN	NaN
437	AAV	CamKIIa	aIC	aIC 1294	1.65	Substantia Nigra	Midbrain	-2.4	56575	618068	0.092	0.1389	18.6992	NaN	NaN
438	AAV	CamKIIa	aIC	aIC 1294	1.65	Ventral Group of the Dorsal Thalamus	Thalamus	-2.4	6515	257009	0.025	0.0159952	5.0813	NaN	NaN
439	AAV	CamKIIa	aIC	aIC 1294	1.65	Ventral Pallidum	Pallidum	-2.4	163	562479	0.0002898	0.000400188	0.0589024	NaN	NaN
440	AAV	CamKIIa	aIC	aIC 1294	1.65	Perirhinal Cortex	Association Cortex	-2.4	3597	343766	0.01	0.00883114	2.03252	NaN	NaN
441	AAV	CamKIIa	aIC	aIC 1294	1.65	Entorhinal Cortex	Association Cortex	-2.4	7314	403462	0.018	0.0179569	3.65854	NaN	NaN
442	AAV	CamKIIa	aIC	aIC 1294	1.65	Visual Cortex, primary	Sensory Cortex	-2.4	2370	1.99561e+06	0.001	0.00581869	0.203252	NaN	NaN
443	AAV	CamKIIa	aIC	aIC 1294	1.65	Intralaminar Nuclei of the Dorsal Thalamus	Thalamus	-2.4	3917	987009	0.004	0.00961679	0.813008	NaN	NaN
444	AAV	CamKIIa	aIC	aIC 1294	1.65	Posterior Complex of the Thalamus	Thalamus	-2.4	5269	65897.2	0.08	0.0129361	16.2602	NaN	NaN
445	AAV	CamKIIa	aIC	aIC 1294	1.65	Lateral Amygdala	Amygdala	-2.4	600	309702	0.002	0.00147308	0.406504	NaN	NaN
446	AAV	CamKIIa	aIC	aIC 1294	1.65	Basolateral Nucleus	Amygdala	-2.4	103	330922	0.0003113	0.00025288	0.0632724	NaN	NaN
447	AAV	CamKIIa	aIC	aIC 1294	1.65	Somatosensory Cortex, primary	Sensory Cortex	-2.4	322	650598	0.0004949	0.000790556	0.100589	NaN	NaN
448	AAV	CamKIIa	aIC	aIC 1294	1.65	Endopiriform Nucleus	Olfactory areas	-2.4	178	71136.2	0.003	0.000437015	0.609756	NaN	NaN
449	AAV	CamKIIa	aIC	aIC 1294	1.65	Hypothalamic Lateral Zone	Hypothalamus	-2.4	55883	284592	0.196	0.137201	39.8374	NaN	NaN
450	AAV	CamKIIa	aIC	aIC 1294	1.65	Substantia Nigra	Midbrain	-2.4	3402	326481	0.01	0.00835239	2.03252	NaN	NaN
451	AAV	CamKIIa	aIC	aIC 1294	1.65	Posterior Complex of the Thalamus	Thalamus	-2.4	235	1.06161e+06	0.0002214	0.000576958	0.045	NaN	NaN
452	AAV	CamKIIa	aIC	aIC 1294	1.65	Paraventricular Thalamic Nucleus	Midbrain	-2.4	1000	481927	0.002	0.00245514	0.406504	NaN	NaN
453	AAV	CamKIIa	aIC	aIC 1294	1.65	Hypothalamic Lateral Zone	Hypothalamus	-2.4	1015	831020	0.001	0.00249197	0.203252	NaN	NaN
454	AAV	CamKIIa	aIC	aIC 1294	1.65	Retrosplenial Cortex	Association Cortex	-2.7	1051	357945	0.003	0.00258035	0.609756	NaN	NaN
455	AAV	CamKIIa	aIC	aIC 1294	1.65	Retrosplenial Cortex	Association Cortex	-2.7	318	377167	0.0008431	0.000780735	0.171362	NaN	NaN
456	AAV	CamKIIa	aIC	aIC 1294	1.65	Ectorhinal Cortex	Association Cortex	-2.7	331	394091	0.0008399	0.000812652	0.170711	NaN	NaN
457	AAV	CamKIIa	aIC	aIC 1294	1.65	Auditory Cortex, secondary or higher	Sensory Cortex	-2.7	556	690271	0.0008055	0.00136506	0.16372	NaN	NaN
458	AAV	CamKIIa	aIC	aIC 1294	1.65	Temporal Association Cortex	Association Cortex	-2.7	124	331109	0.0003745	0.000304438	0.0761179	NaN	NaN
459	AAV	CamKIIa	aIC	aIC 1294	1.65	Perirhinal Cortex	Association Cortex	-2.7	880	387698	0.002	0.00216052	0.406504	NaN	NaN
460	AAV	CamKIIa	aIC	aIC 1294	1.65	Entorhinal Cortex	Association Cortex	-2.7	2532	510643	0.005	0.00621642	1.01626	NaN	NaN
461	AAV	CamKIIa	aIC	aIC 1294	1.65	Visual Cortex, primary	Sensory Cortex	-2.7	2059	2.55762e+06	0.000805	0.00505514	0.163618	NaN	NaN
462	AAV	CamKIIa	aIC	aIC 1294	1.65	Basolateral Nucleus	Amygdala	-2.7	182	370367	0.0004914	0.000446836	0.099878	NaN	NaN
463	AAV	CamKIIa	aIC	aIC 1294	1.65	Auditory Cortex, secondary or higher	Sensory Cortex	-2.7	1052	1.28649e+06	0.0008177	0.00258281	0.166199	NaN	NaN
464	AAV	CamKIIa	aIC	aIC 1294	1.65	Substantia Nigra	Midbrain	-2.7	33741	430986	0.078	0.0828389	15.8537	NaN	NaN
465	AAV	CamKIIa	aIC	aIC 1294	1.65	Posterior Complex of the Thalamus	Thalamus	-2.7	13625	194358	0.07	0.0334513	14.2276	NaN	NaN
466	AAV	CamKIIa	aIC	aIC 1294	1.65	Basolateral Nucleus	Amygdala	-2.7	3	228252	1.31e-05	7.36542e-06	0.0026626	NaN	NaN
467	AAV	CamKIIa	aIC	aIC 1294	1.65	Hypothalamic Lateral Zone	Hypothalamus	-2.7	4858	698189	0.007	0.0119271	1.42276	NaN	NaN
468	AAV	CamKIIa	aIC	aIC 1294	1.65	Substantia Nigra	Midbrain	-2.7	61719	523555	0.118	0.151529	23.9837	NaN	NaN
469	AAV	CamKIIa	aIC	aIC 1294	1.65	Ventral Tegmental Area	Midbrain	-2.7	18059	298028	0.061	0.0443374	12.3984	NaN	NaN
470	AAV	CamKIIa	aIC	aIC 1294	1.65	Substantia Nigra	Midbrain	-2.7	1626	259804	0.006	0.00399206	1.21951	NaN	NaN
471	AAV	CamKIIa	aIC	aIC 1294	1.65	Hypothalamic Medial Zone	Hypothalamus	-2.7	2323	146130	0.016	0.00570329	3.25203	NaN	NaN
472	AAV	CamKIIa	aIC	aIC 1294	1.65	Periaqueductal Gray	Midbrain	-2.7	3761	789384	0.005	0.00923379	1.01626	NaN	NaN
473	AAV	CamKIIa	aIC	aIC 1294	1.65	Midbrain Reticular Nucleus	Midbrain	-2.7	1834	918911	0.002	0.00450273	0.406504	NaN	NaN
474	AAV	CamKIIa	aIC	aIC 1294	1.65	Hypothalamic Lateral Zone	Hypothalamus	-2.7	1035	285305	0.004	0.00254107	0.813008	NaN	NaN
475	AAV	CamKIIa	aIC	aIC 1294	1.65	Retrosplenial Cortex	Association Cortex	-2.9	458	405936	0.001	0.00112445	0.203252	NaN	NaN
476	AAV	CamKIIa	aIC	aIC 1294	1.65	Retrosplenial Cortex	Association Cortex	-2.9	252	493448	0.0005107	0.000618696	0.103801	NaN	NaN
477	AAV	CamKIIa	aIC	aIC 1294	1.65	Ectorhinal Cortex	Association Cortex	-2.9	223	393842	0.0005662	0.000547497	0.115081	NaN	NaN
478	AAV	CamKIIa	aIC	aIC 1294	1.65	Auditory Cortex, secondary or higher	Sensory Cortex	-2.9	125	497838	0.0002511	0.000306893	0.0510366	NaN	NaN
479	AAV	CamKIIa	aIC	aIC 1294	1.65	Temporal Association Cortex	Association Cortex	-2.9	91	330756	0.0002751	0.000223418	0.0559146	NaN	NaN
480	AAV	CamKIIa	aIC	aIC 1294	1.65	Perirhinal Cortex	Association Cortex	-2.9	2183	340846	0.006	0.00535957	1.21951	NaN	NaN
481	AAV	CamKIIa	aIC	aIC 1294	1.65	Entorhinal Cortex	Association Cortex	-2.9	1866	420155	0.004	0.00458129	0.813008	NaN	NaN
482	AAV	CamKIIa	aIC	aIC 1294	1.65	Visual Cortex, primary	Sensory Cortex	-2.9	932	2.72773e+06	0.0003417	0.00228819	0.0694512	NaN	NaN
483	AAV	CamKIIa	aIC	aIC 1294	1.65	Auditory Cortex, primary	Sensory Cortex	-2.9	539	1.54777e+06	0.0003482	0.00132332	0.0707724	NaN	NaN
484	AAV	CamKIIa	aIC	aIC 1294	1.65	Substantia Nigra	Midbrain	-2.9	13920	390111	0.036	0.0341756	7.31707	NaN	NaN
485	AAV	CamKIIa	aIC	aIC 1294	1.65	Posterior Complex of the Thalamus	Thalamus	-2.9	2578	194358	0.013	0.00632935	2.64228	NaN	NaN
486	AAV	CamKIIa	aIC	aIC 1294	1.65	Hypothalamic Lateral Zone	Hypothalamus	-2.9	32940	660046	0.05	0.0808724	10.1626	NaN	NaN
487	AAV	CamKIIa	aIC	aIC 1294	1.65	Substantia Nigra	Midbrain	-2.9	18359	446956	0.041	0.0450739	8.33333	NaN	NaN
488	AAV	CamKIIa	aIC	aIC 1294	1.65	Substantia Nigra	Midbrain	-2.9	780	259804	0.003	0.00191501	0.609756	NaN	NaN
489	AAV	CamKIIa	aIC	aIC 1294	1.65	Periaqueductal Gray	Midbrain	-2.9	240	632421	0.0003795	0.000589234	0.0771341	NaN	NaN
490	AAV	CamKIIa	aIC	aIC 1294	1.65	Midbrain Reticular Nucleus	Midbrain	-2.9	864	780764	0.001	0.00212124	0.203252	NaN	NaN
491	AAV	CamKIIa	aIC	aIC 1294	1.65	Entorhinal Cortex	Association Cortex	-2.9	178	587918	0.0003028	0.000437015	0.0615447	NaN	NaN
492	AAV	CamKIIa	aIC	aIC 1294	1.65	Ventral Tegmental Area	Midbrain	-2.9	7033	189214	0.037	0.017267	7.52033	NaN	NaN
493	AAV	CamKIIa	aIC	aIC 1294	1.65	Ventral Tegmental Area	Midbrain	-2.9	4070	187160	0.022	0.00999243	4.47154	NaN	NaN
494	AAV	CamKIIa	aIC	aIC 1294	1.65	Raphe Nuclei	Midbrain	-2.9	511	204293	0.003	0.00125458	0.609756	NaN	NaN
495	AAV	CamKIIa	aIC	aIC 1294	1.65	Retrosplenial Cortex	Association Cortex	-3.3	219	274900	0.0007967	0.000537676	0.161931	NaN	NaN
496	AAV	CamKIIa	aIC	aIC 1294	1.65	Retrosplenial Cortex	Association Cortex	-3.3	401	460004	0.0008717	0.000984512	0.177175	NaN	NaN
497	AAV	CamKIIa	aIC	aIC 1294	1.65	Ectorhinal Cortex	Association Cortex	-3.3	1038	393842	0.003	0.00254844	0.609756	NaN	NaN
498	AAV	CamKIIa	aIC	aIC 1294	1.65	Temporal Association Cortex	Association Cortex	-3.3	286	330756	0.0008647	0.00070217	0.175752	NaN	NaN
499	AAV	CamKIIa	aIC	aIC 1294	1.65	Perirhinal Cortex	Association Cortex	-3.3	1200	340846	0.004	0.00294617	0.813008	NaN	NaN
500	AAV	CamKIIa	aIC	aIC 1294	1.65	Entorhinal Cortex	Association Cortex	-3.3	308	420155	0.0007331	0.000756184	0.149004	NaN	NaN
501	AAV	CamKIIa	aIC	aIC 1294	1.65	Visual Cortex, primary	Sensory Cortex	-3.3	1096	2.84178e+06	0.0003857	0.00269084	0.0783943	NaN	NaN
502	AAV	CamKIIa	aIC	aIC 1294	1.65	Auditory Cortex, primary	Sensory Cortex	-3.3	1117	2.13839e+06	0.0005224	0.00274239	0.106179	NaN	NaN
503	AAV	CamKIIa	aIC	aIC 1294	1.65	Substantia Nigra	Midbrain	-3.3	22043	369258	0.06	0.0541187	12.1951	NaN	NaN
504	AAV	CamKIIa	aIC	aIC 1294	1.65	Substantia Nigra	Midbrain	-3.3	66729	882143	0.076	0.163829	15.4472	NaN	NaN
505	AAV	CamKIIa	aIC	aIC 1294	1.65	Entorhinal Cortex	Association Cortex	-3.3	383	434156	0.0008822	0.000940319	0.179309	NaN	NaN
506	AAV	CamKIIa	aIC	aIC 1294	1.65	Ventral Tegmental Area	Midbrain	-3.3	7393	259608	0.028	0.0181509	5.69106	NaN	NaN
507	AAV	CamKIIa	aIC	aIC 1294	1.65	Ventral Tegmental Area	Midbrain	-3.3	8633	304455	0.028	0.0211952	5.69106	NaN	NaN
508	AAV	CamKIIa	aIC	aIC 1294	1.65	Raphe Nuclei	Midbrain	-3.3	1194	106577	0.011	0.00293144	2.23577	NaN	NaN
509	AAV	CamKIIa	aIC	aIC 1294	1.65	Hypothalamic Lateral Zone	Hypothalamus	-3.3	7656	379881	0.02	0.0187966	4.06504	NaN	NaN
510	AAV	CamKIIa	aIC	aIC 1294	1.65	Midbrain Reticular Nucleus	Midbrain	-3.3	746	379235	0.002	0.00183154	0.406504	NaN	NaN
511	AAV	CamKIIa	aIC	aIC 1294	1.65	Periaqueductal Gray	Midbrain	-3.3	149	307963	0.0004838	0.000365816	0.0983333	NaN	NaN
512	AAV	CamKIIa	aIC	aIC 1294	1.65	Retrosplenial Cortex	Association Cortex	-3.6	311	445863	0.0006975	0.000763549	0.141768	NaN	NaN
513	AAV	CamKIIa	aIC	aIC 1294	1.65	Retrosplenial Cortex	Association Cortex	-3.6	102	501317	0.0002035	0.000250424	0.0413618	NaN	NaN
514	AAV	CamKIIa	aIC	aIC 1294	1.65	Visual Cortex, primary	Sensory Cortex	-3.6	2223	2.98402e+06	0.000745	0.00545778	0.151423	NaN	NaN
515	AAV	CamKIIa	aIC	aIC 1294	1.65	Auditory Cortex, primary	Sensory Cortex	-3.6	332	1.08808e+06	0.0003051	0.000815107	0.0620122	NaN	NaN
516	AAV	CamKIIa	aIC	aIC 1294	1.65	Temporal Association Cortex	Association Cortex	-3.6	115	374503	0.0003071	0.000282341	0.0624187	NaN	NaN
517	AAV	CamKIIa	aIC	aIC 1294	1.65	Ectorhinal Cortex	Association Cortex	-3.6	33	308488	0.000107	8.10197e-05	0.021748	NaN	NaN
518	AAV	CamKIIa	aIC	aIC 1294	1.65	Perirhinal Cortex	Association Cortex	-3.6	124	210371	0.0005894	0.000304438	0.119797	NaN	NaN
519	AAV	CamKIIa	aIC	aIC 1294	1.65	Entorhinal Cortex	Association Cortex	-3.6	3125	496919	0.006	0.00767232	1.21951	NaN	NaN
520	AAV	CamKIIa	aIC	aIC 1294	1.65	Pedunculopontine Nucleus	Hindbrain	-3.6	86994	555274	0.157	0.213583	31.9106	NaN	NaN
521	AAV	CamKIIa	aIC	aIC 1294	1.65	Substantia Nigra	Midbrain	-3.6	56750	618880	0.092	0.139329	18.6992	NaN	NaN
522	AAV	CamKIIa	aIC	aIC 1294	1.65	Substantia Nigra	Midbrain	-3.6	24608	917492	0.027	0.0604161	5.4878	NaN	NaN
523	AAV	CamKIIa	aIC	aIC 1294	1.65	Midbrain Reticular Nucleus	Midbrain	-3.6	1122	212664	0.005	0.00275467	1.01626	NaN	NaN
524	AAV	CamKIIa	aIC	aIC 1294	1.65	Ventral Tegmental Area	Midbrain	-3.6	3183	295541	0.011	0.00781472	2.23577	NaN	NaN
525	AAV	CamKIIa	aIC	aIC 1294	1.65	Periaqueductal Gray	Midbrain	-3.6	5214	836173	0.006	0.0128011	1.21951	NaN	NaN
526	AAV	CamKIIa	aIC	aIC 1294	1.65	Midbrain Reticular Nucleus	Midbrain	-3.6	39453	989596	0.04	0.0968627	8.13008	NaN	NaN
527	AAV	CamKIIa	aIC	aIC 1294	1.65	Periaqueductal Gray	Midbrain	-3.6	368	208199	0.002	0.000903492	0.406504	NaN	NaN
528	AAV	CamKIIa	aIC	aIC 1294	1.65	Visual Cortex, primary	Sensory Cortex	-3.7	4269	3.66093e+06	0.001	0.010481	0.203252	NaN	NaN
529	AAV	CamKIIa	aIC	aIC 1294	1.65	Temporal Association Cortex	Association Cortex	-3.7	700	1.32223e+06	0.0005294	0.0017186	0.107602	NaN	NaN
530	AAV	CamKIIa	aIC	aIC 1294	1.65	Ectorhinal Cortex	Association Cortex	-3.7	1458	308488	0.005	0.0035796	1.01626	NaN	NaN
531	AAV	CamKIIa	aIC	aIC 1294	1.65	Perirhinal Cortex	Association Cortex	-3.7	199	264390	0.0007527	0.000488573	0.152988	NaN	NaN
532	AAV	CamKIIa	aIC	aIC 1294	1.65	Entorhinal Cortex	Association Cortex	-3.7	26	520750	4.99e-05	6.38337e-05	0.0101423	NaN	NaN
533	AAV	CamKIIa	aIC	aIC 1294	1.65	Pedunculopontine Nucleus	Hindbrain	-3.7	17359	407408	0.043	0.0426188	8.73984	NaN	NaN
534	AAV	CamKIIa	aIC	aIC 1294	1.65	Substantia Nigra	Midbrain	-3.7	73518	1.09379e+06	0.067	0.180497	13.6179	NaN	NaN
535	AAV	CamKIIa	aIC	aIC 1294	1.65	Midbrain Reticular Nucleus	Midbrain	-3.7	66312	901970	0.074	0.162805	15.0407	NaN	NaN
536	AAV	CamKIIa	aIC	aIC 1294	1.65	Substantia Nigra	Midbrain	-3.7	14842	687450	0.022	0.0364392	4.47154	NaN	NaN
537	AAV	CamKIIa	aIC	aIC 1294	1.65	Ventral Tegmental Area	Midbrain	-3.7	2701	286001	0.009	0.00663134	1.82927	NaN	NaN
538	AAV	CamKIIa	aIC	aIC 1294	1.65	Ventral Tegmental Area	Midbrain	-3.7	559	168895	0.003	0.00137242	0.609756	NaN	NaN
539	AAV	CamKIIa	aIC	aIC 1294	1.65	Periaqueductal Gray	Midbrain	-3.7	11446	802214	0.014	0.0281016	2.84553	NaN	NaN
540	AAV	CamKIIa	aIC	aIC 1294	1.65	Substantia Nigra	Midbrain	-3.7	128	222303	0.0005758	0.000314258	0.117033	NaN	NaN
541	AAV	CamKIIa	aIC	aIC 1294	1.65	Midbrain Reticular Nucleus	Midbrain	-3.7	7509	339364	0.022	0.0184357	4.47154	NaN	NaN
542	AAV	CamKIIa	aIC	aIC 1294	1.65	Retrosplenial Cortex	Association Cortex	-3.7	178	156702	0.001	0.000437015	0.203252	NaN	NaN
543	AAV	CamKIIa	aIC	aIC 1294	1.65	Visual Cortex, primary	Sensory Cortex	-3.8	2194	2.94555e+06	0.0007449	0.00538658	0.151402	NaN	NaN
544	AAV	CamKIIa	aIC	aIC 1294	1.65	Temporal Association Cortex	Association Cortex	-3.8	197	1.07754e+06	0.0001828	0.000483663	0.0371545	NaN	NaN
545	AAV	CamKIIa	aIC	aIC 1294	1.65	Ectorhinal Cortex	Association Cortex	-3.8	65	357034	0.0001821	0.000159584	0.0370122	NaN	NaN
546	AAV	CamKIIa	aIC	aIC 1294	1.65	Perirhinal Cortex	Association Cortex	-3.8	2236	285874	0.008	0.0054897	1.62602	NaN	NaN
547	AAV	CamKIIa	aIC	aIC 1294	1.65	Entorhinal Cortex	Association Cortex	-3.8	596	520750	0.001	0.00146326	0.203252	NaN	NaN
548	AAV	CamKIIa	aIC	aIC 1294	1.65	Pedunculopontine Nucleus	Hindbrain	-3.8	83	407408	0.0002037	0.000203777	0.0414024	NaN	NaN
549	AAV	CamKIIa	aIC	aIC 1294	1.65	Periaqueductal Gray	Midbrain	-3.8	3127	715608	0.004	0.00767723	0.813008	NaN	NaN
550	AAV	CamKIIa	aIC	aIC 1294	1.65	Retrosplenial Cortex	Association Cortex	-3.8	256	156702	0.002	0.000628516	0.406504	NaN	NaN
551	AAV	CamKIIa	aIC	aIC 1294	1.65	Retrosplenial Cortex	Association Cortex	-3.8	470	283300	0.002	0.00115392	0.406504	NaN	NaN
552	AAV	CamKIIa	aIC	aIC 1294	1.65	Substantia Nigra	Midbrain	-3.8	146	236942	0.0006162	0.000358451	0.125244	NaN	NaN
553	AAV	CamKIIa	aIC	aIC 1294	1.65	Midbrain Reticular Nucleus	Midbrain	-3.8	354	185541	0.002	0.00086912	0.406504	NaN	NaN
554	AAV	CamKIIa	aIC	aIC 1294	1.65	Midbrain Reticular Nucleus	Midbrain	-3.8	173	193838	0.0008925	0.000424739	0.181402	NaN	NaN
555	AAV	CamKIIa	aIC	aIC 1294	1.65	Midbrain Reticular Nucleus	Midbrain	-3.8	863	1.07375e+06	0.0008037	0.00211879	0.163354	NaN	NaN
556	AAV	CamKIIa	aIC	aIC 1294	1.65	Substantia Nigra	Midbrain	-4	3322	282652	0.012	0.00815598	2.43902	NaN	NaN
557	AAV	CamKIIa	aIC	aIC 1294	1.65	Raphe Nuclei	Midbrain	-4	1404	917788	0.002	0.00344702	0.406504	NaN	NaN
558	AAV	CamKIIa	aIC	aIC 1294	1.65	Periaqueductal Gray	Midbrain	-4	2446	1.38401e+06	0.002	0.00600528	0.406504	NaN	NaN
559	AAV	CamKIIa	aIC	aIC 1294	1.65	Raphe Nuclei	Midbrain	-4	2235	199440	0.011	0.00548724	2.23577	NaN	NaN
560	AAV	CamKIIa	aIC	aIC 1294	1.65	Raphe Nuclei	Midbrain	-4	243	200885	0.001	0.000596599	0.203252	NaN	NaN
561	AAV	CamKIIa	aIC	aIC 1294	1.65	Midbrain Reticular Nucleus	Midbrain	-4	33732	2.03465e+06	0.017	0.0828168	3.45528	NaN	NaN
562	AAV	CamKIIa	aIC	aIC 1294	1.65	Superior Colliculus	Midbrain	-4	2196	501385	0.004	0.00539149	0.813008	NaN	NaN
563	AAV	CamKIIa	aIC	aIC 1294	1.65	Pedunculopontine Nucleus	Hindbrain	-4	2959	2.66151e+06	0.001	0.00726476	0.203252	NaN	NaN
564	AAV	CamKIIa	aIC	aIC 1294	1.65	Periaqueductal Gray	Midbrain	-4.3	3708	2.08256e+06	0.002	0.00910366	0.406504	NaN	NaN
565	AAV	CamKIIa	aIC	aIC 1294	1.65	Pedunculopontine Nucleus	Hindbrain	-4.3	11304	545424	0.021	0.0277529	4.26829	NaN	NaN
566	AAV	CamKIIa	aIC	aIC 1294	1.65	Raphe Nuclei	Midbrain	-4.3	6765	623387	0.011	0.016609	2.23577	NaN	NaN
567	AAV	CamKIIa	aIC	aIC 1294	1.65	Pedunculopontine Nucleus	Hindbrain	-4.3	684	570249	0.001	0.00167932	0.203252	NaN	NaN
568	AAV	CamKIIa	aIC	aIC 1294	1.65	Perirhinal Cortex	Association Cortex	-4.3	291	230308	0.001	0.000714446	0.203252	NaN	NaN
569	AAV	CamKIIa	aIC	aIC 1294	1.65	Entorhinal Cortex	Association Cortex	-4.3	279	1.04625e+06	0.0002667	0.000684984	0.0542073	NaN	NaN
570	AAV	CamKIIa	aIC	aIC 1294	1.65	Pedunculopontine Nucleus	Hindbrain	-4.3	1060	475493	0.002	0.00260245	0.406504	NaN	NaN
571	AAV	CamKIIa	aIC	aIC 1294	1.65	Pedunculopontine Nucleus	Hindbrain	-4.3	303	433033	0.0006997	0.000743908	0.142215	NaN	NaN
572	AAV	CamKIIa	aIC	aIC 1294	1.65	Midbrain Reticular Nucleus	Midbrain	-4.3	991	648056	0.002	0.00243305	0.406504	NaN	NaN
573	AAV	CamKIIa	aIC	aIC 1294	1.65	Raphe Nuclei	Midbrain	-4.3	579	1.26536e+06	0.0004576	0.00142153	0.0930081	NaN	NaN
574	AAV	CamKIIa	aIC	aIC 1294	1.65	Pedunculopontine Nucleus	Hindbrain	-4.3	1885	1.63434e+06	0.001	0.00462794	0.203252	NaN	NaN
575	AAV	CamKIIa	aIC	aIC 1294	1.65	Raphe Nuclei	Midbrain	-4.4	3739	875973	0.004	0.00917977	0.813008	NaN	NaN
576	AAV	CamKIIa	aIC	aIC 1294	1.65	Periaqueductal Gray	Midbrain	-4.4	290	1.79342e+06	0.0001617	0.000711991	0.0328659	NaN	NaN
577	AAV	CamKIIa	aIC	aIC 1294	1.65	Entorhinal Cortex	Association Cortex	-4.4	1669	615304	0.003	0.00409763	0.609756	NaN	NaN
578	AAV	CamKIIa	aIC	aIC 1294	1.65	Perirhinal Cortex	Association Cortex	-4.4	280	411146	0.000681	0.00068744	0.138415	NaN	NaN
579	AAV	CamKIIa	aIC	aIC 1294	1.65	Ectorhinal Cortex	Association Cortex	-4.4	68	527631	0.0001289	0.00016695	0.0261992	NaN	NaN
580	AAV	CamKIIa	aIC	aIC 1294	1.65	Raphe Nuclei	Midbrain	-4.4	1262	1.33161e+06	0.0009477	0.00309839	0.192622	NaN	NaN
581	AAV	CamKIIa	aIC	aIC 1294	1.65	Pedunculopontine Nucleus	Hindbrain	-4.4	5956	336352	0.018	0.0146228	3.65854	NaN	NaN
582	AAV	CamKIIa	aIC	aIC 1294	1.65	Pedunculopontine Nucleus	Hindbrain	-4.4	3929	1.39605e+06	0.003	0.00964625	0.609756	NaN	NaN
583	AAV	CamKIIa	aIC	aIC 1294	1.65	Entorhinal Cortex	Association Cortex	-4.4	490	494591	0.0009907	0.00120302	0.201362	NaN	NaN
584	AAV	CamKIIa	aIC	aIC 1294	1.65	Pedunculopontine Nucleus	Hindbrain	-4.4	459	107730	0.004	0.00112691	0.813008	NaN	NaN
585	AAV	CamKIIa	aIC	aIC 1294	1.65	Midbrain Reticular Nucleus	Midbrain	-4.4	672	771540	0.000871	0.00164986	0.177033	NaN	NaN
586	AAV	CamKIIa	aIC	aIC 1294	1.65	Pedunculopontine Nucleus	Hindbrain	-4.4	579	337820	0.002	0.00142153	0.406504	NaN	NaN
587	AAV	CamKIIa	aIC	aIC 1294	1.65	Pedunculopontine Nucleus	Hindbrain	-4.4	3638	1.66489e+06	0.002	0.0089318	0.406504	NaN	NaN
588	AAV	CamKIIa	aIC	aIC 1294	1.65	Raphe Nuclei	Midbrain	-4.7	223	830846	0.0002684	0.000547497	0.0545528	NaN	NaN
589	AAV	CamKIIa	aIC	aIC 1294	1.65	Periaqueductal Gray	Midbrain	-4.7	7	1.53419e+06	4.56e-06	1.7186e-05	0.000926829	NaN	NaN
590	AAV	CamKIIa	aIC	aIC 1294	1.65	Perirhinal Cortex	Association Cortex	-4.7	542	237735	0.002	0.00133069	0.406504	NaN	NaN
591	AAV	CamKIIa	aIC	aIC 1294	1.65	Ectorhinal Cortex	Association Cortex	-4.7	1015	398302	0.003	0.00249197	0.609756	NaN	NaN
592	AAV	CamKIIa	aIC	aIC 1294	1.65	Raphe Nuclei	Midbrain	-4.7	4697	1.07083e+06	0.004	0.0115318	0.813008	NaN	NaN
593	AAV	CamKIIa	aIC	aIC 1294	1.65	Midbrain Reticular Nucleus	Midbrain	-4.7	29370	570202	0.052	0.0721075	10.5691	NaN	NaN
594	AAV	CamKIIa	aIC	aIC 1294	1.65	Temporal Association Cortex	Association Cortex	-4.7	381	327038	0.001	0.000935409	0.203252	NaN	NaN
595	AAV	CamKIIa	aIC	aIC 1294	1.65	Entorhinal Cortex	Association Cortex	-4.7	279	558329	0.0004997	0.000684984	0.101565	NaN	NaN
596	AAV	CamKIIa	aIC	aIC 1294	1.65	Pedunculopontine Nucleus	Hindbrain	-4.7	3613	515497	0.007	0.00887043	1.42276	NaN	NaN
597	AAV	CamKIIa	aIC	aIC 1294	1.65	Pedunculopontine Nucleus	Hindbrain	-4.7	1455	160987	0.009	0.00357223	1.82927	NaN	NaN
598	AAV	CamKIIa	aIC	aIC 1294	1.65	Pedunculopontine Nucleus	Hindbrain	-4.7	9349	297144	0.031	0.0229531	6.30081	NaN	NaN
599	AAV	CamKIIa	aIC	aIC 1294	1.65	Pedunculopontine Nucleus	Hindbrain	-4.7	3404	133194	0.026	0.0083573	5.28455	NaN	NaN
600	AAV	CamKIIa	aIC	aIC 1294	1.65	Pedunculopontine Nucleus	Hindbrain	-4.7	645	130913	0.005	0.00158357	1.01626	NaN	NaN
601	AAV	CamKIIa	aIC	aIC 1294	1.65	Pedunculopontine Nucleus	Hindbrain	-4.7	964	98454.9	0.01	0.00236676	2.03252	NaN	NaN
602	AAV	CamKIIa	aIC	aIC 1294	1.65	Pedunculopontine Nucleus	Hindbrain	-4.7	2910	958028	0.003	0.00714446	0.609756	NaN	NaN
603	AAV	CamKIIa	aIC	aIC 1294	1.65	Motor Trigeminal Nucleus	Hindbrain	-4.7	9232	1.03265e+06	0.009	0.0226659	1.82927	NaN	NaN
604	AAV	CamKIIa	aIC	aIC 1294	1.65	Pedunculopontine Nucleus	Hindbrain	-4.9	144	164029	0.0008779	0.00035354	0.178435	NaN	NaN
605	AAV	CamKIIa	aIC	aIC 1294	1.65	Pedunculopontine Nucleus	Hindbrain	-4.9	339	481569	0.0007039	0.000832293	0.143069	NaN	NaN
606	AAV	CamKIIa	aIC	aIC 1294	1.65	Entorhinal Cortex	Association Cortex	-4.9	1452	2.88364e+06	0.0005035	0.00356487	0.102337	NaN	NaN
607	AAV	CamKIIa	aIC	aIC 1294	1.65	Raphe Nuclei	Midbrain	-4.9	1576	1.12558e+06	0.001	0.0038693	0.203252	NaN	NaN
608	AAV	CamKIIa	aIC	aIC 1294	1.65	Pedunculopontine Nucleus	Hindbrain	-4.9	7602	1.63885e+06	0.005	0.018664	1.01626	NaN	NaN
609	AAV	CamKIIa	aIC	aIC 1294	1.65	Pedunculopontine Nucleus	Hindbrain	-4.9	4716	232825	0.02	0.0115784	4.06504	NaN	NaN
610	AAV	CamKIIa	aIC	aIC 1294	1.65	Pedunculopontine Nucleus	Hindbrain	-4.9	14132	360509	0.039	0.0346961	7.92683	NaN	NaN
611	AAV	CamKIIa	aIC	aIC 1294	1.65	Parabrachial Nucleus	Hindbrain	-4.9	34988	554277	0.063	0.0859005	12.8049	NaN	NaN
612	AAV	CamKIIa	aIC	aIC 1294	1.65	Hippocampus (CA1,CA2,CA3)	Hippocampus	-4.9	3661	802974	0.005	0.00898827	1.01626	NaN	NaN
613	AAV	CamKIIa	aIC	aIC 1294	1.65	Motor Trigeminal Nucleus	Hindbrain	-4.9	2586	634675	0.004	0.006349	0.813008	NaN	NaN
614	AAV	CamKIIa	aIC	aIC 1294	1.65	Pedunculopontine Nucleus	Hindbrain	-4.9	689	371013	0.002	0.00169159	0.406504	NaN	NaN
615	AAV	CamKIIa	aIC	aIC 1294	1.65	Pedunculopontine Nucleus	Hindbrain	-4.9	1369	196355	0.007	0.00336109	1.42276	NaN	NaN
616	AAV	CamKIIa	aIC	aIC 1294	1.65	Parabrachial Nucleus	Hindbrain	-5	59600	722906	0.082	0.146326	16.6667	NaN	NaN
617	AAV	CamKIIa	aIC	aIC 1294	1.65	Motor Trigeminal Nucleus	Hindbrain	-5	16931	757347	0.022	0.041568	4.47154	NaN	NaN
618	AAV	CamKIIa	aIC	aIC 1294	1.65	Pedunculopontine Nucleus	Hindbrain	-5	3459	1.32621e+06	0.003	0.00849233	0.609756	NaN	NaN
619	AAV	CamKIIa	aIC	aIC 1294	1.65	Hippocampus (CA1,CA2,CA3)	Hippocampus	-5	3784	872313	0.004	0.00929026	0.813008	NaN	NaN
620	AAV	CamKIIa	aIC	aIC 1294	1.65	Medulla	Hindbrain	-5	1164	335251	0.003	0.00285778	0.609756	NaN	NaN
621	AAV	CamKIIa	aIC	aIC 1294	1.65	Pedunculopontine Nucleus	Hindbrain	-5	3002	112569	0.027	0.00737033	5.4878	NaN	NaN
622	AAV	CamKIIa	aIC	aIC 1294	1.65	Raphe Nuclei	Midbrain	-5	2327	120593	0.019	0.00571311	3.86179	NaN	NaN
623	AAV	CamKIIa	aIC	aIC 1294	1.65	Pedunculopontine Nucleus	Hindbrain	-5	1643	251488	0.007	0.0040338	1.42276	NaN	NaN
624	AAV	CamKIIa	aIC	aIC 1294	1.65	Pedunculopontine Nucleus	Hindbrain	-5	315	79307.6	0.004	0.00077337	0.813008	NaN	NaN
625	AAV	CamKIIa	aIC	aIC 1294	1.65	Pedunculopontine Nucleus	Hindbrain	-5	232	398486	0.0005822	0.000569593	0.118333	NaN	NaN
626	AAV	CamKIIa	aIC	aIC 1294	1.65	Entorhinal Cortex	Association Cortex	-5	1292	3.75297e+06	0.0003443	0.00317204	0.0699797	NaN	NaN
627	AAV	CamKIIa	aIC	aIC 1294	1.65	Parabrachial Nucleus	Hindbrain	-5.3	25292	970425	0.026	0.0620954	5.28455	NaN	NaN
628	AAV	CamKIIa	aIC	aIC 1294	1.65	Raphe Nuclei	Midbrain	-5.3	1919	157384	0.012	0.00471142	2.43902	NaN	NaN
629	AAV	CamKIIa	aIC	aIC 1294	1.65	Pedunculopontine Nucleus	Hindbrain	-5.3	926	215377	0.004	0.00227346	0.813008	NaN	NaN
630	AAV	CamKIIa	aIC	aIC 1294	1.65	Hippocampus (CA1,CA2,CA3)	Hippocampus	-5.3	1270	876808	0.001	0.00311803	0.203252	NaN	NaN
631	AAV	CamKIIa	aIC	aIC 1294	1.65	Medulla	Hindbrain	-5.3	383	198390	0.002	0.000940319	0.406504	NaN	NaN
632	AAV	CamKIIa	aIC	aIC 1294	1.65	Posterior Complex of the Thalamus	Thalamus	-5.3	1467	319890	0.005	0.00360169	1.01626	NaN	NaN
633	AAV	CamKIIa	aIC	aIC 1294	1.65	Hypothalamic Lateral Zone	Thalamus	-5.3	524	222027	0.002	0.00128649	0.406504	NaN	NaN
634	AAV	CamKIIa	aIC	aIC 1294	1.65	Pedunculopontine Nucleus	Hindbrain	-5.3	925	1.61781e+06	0.0005718	0.00227101	0.11622	NaN	NaN
635	AAV	CamKIIa	aIC	aIC 1294	1.65	Medulla	Hindbrain	-5.4	925	682011	0.001	0.00227101	0.203252	NaN	NaN
636	AAV	CamKIIa	aIC	aIC 1294	1.65	Parabrachial Nucleus	Hindbrain	-5.4	5857	467183	0.013	0.0143798	2.64228	NaN	NaN
637	AAV	CamKIIa	aIC	aIC 1294	1.65	Midbrain Reticular Nucleus	Midbrain	-5.4	594	570279	0.001	0.00145835	0.203252	NaN	NaN
638	AAV	CamKIIa	aIC	aIC 1294	1.65	Pedunculopontine Nucleus	Hindbrain	-5.4	1306	838445	0.002	0.00320641	0.406504	NaN	NaN
639	AAV	CamKIIa	aIC	aIC 1294	1.65	Pedunculopontine Nucleus	Hindbrain	-5.4	962	145852	0.007	0.00236185	1.42276	NaN	NaN
640	AAV	CamKIIa	aIC	aIC 1294	1.65	Raphe Nuclei	Midbrain	-5.4	575	106405	0.005	0.00141171	1.01626	NaN	NaN
641	AAV	CamKIIa	aIC	aIC 1294	1.65	Pedunculopontine Nucleus	Hindbrain	-5.4	525	63421.8	0.008	0.00128895	1.62602	NaN	NaN
642	AAV	CamKIIa	aIC	aIC 1294	1.65	Pedunculopontine Nucleus	Hindbrain	-5.4	753	181563	0.004	0.00184872	0.813008	NaN	NaN
643	AAV	CamKIIa	aIC	aIC 1294	1.65	Pedunculopontine Nucleus	Hindbrain	-5.4	58	155777	0.0003723	0.000142398	0.0756707	NaN	NaN
644	AAV	CamKIIa	aIC	aIC 1294	1.65	Parabrachial Nucleus	Hindbrain	-5.5	1537	204620	0.008	0.00377355	1.62602	NaN	NaN
645	AAV	CamKIIa	aIC	aIC 1294	1.65	Raphe Nuclei	Midbrain	-5.5	697	98137.4	0.007	0.00171123	1.42276	NaN	NaN
646	AAV	CamKIIa	aIC	aIC 1294	1.65	Pedunculopontine Nucleus	Hindbrain	-5.5	274	174466	0.002	0.000672709	0.406504	NaN	NaN
647	AAV	CamKIIa	aIC	aIC 1294	1.65	Midbrain Reticular Nucleus	Midbrain	-5.5	1413	718880	0.002	0.00346912	0.406504	NaN	NaN
648	AAV	CamKIIa	aIC	aIC 1294	1.65	Pedunculopontine Nucleus	Hindbrain	-5.5	402	42165.6	0.01	0.000986967	2.03252	NaN	NaN
649	AAV	CamKIIa	aIC	aIC 1294	1.65	Pedunculopontine Nucleus	Hindbrain	-5.5	1803	1.41266e+06	0.001	0.00442662	0.203252	NaN	NaN
650	AAV	CamKIIa	aIC	aIC 1294	1.65	Medulla	Hindbrain	-5.5	697	125115	0.006	0.00171123	1.21951	NaN	NaN
651	AAV	CamKIIa	aIC	aIC 1294	1.65	Pedunculopontine Nucleus	Hindbrain	-5.5	246	135756	0.002	0.000603965	0.406504	NaN	NaN
652	AAV	CamKIIa	aIC	aIC 1294	1.65	Pedunculopontine Nucleus	Hindbrain	-5.7	6177	962964	0.006	0.0151654	1.21951	NaN	NaN
653	AAV	CamKIIa	aIC	aIC 1294	1.65	Medulla	Hindbrain	-5.7	8982	510238	0.018	0.0220521	3.65854	NaN	NaN
654	AAV	CamKIIa	aIC	aIC 1294	1.65	Medulla	Hindbrain	-5.7	8244	530410	0.016	0.0202402	3.25203	NaN	NaN
655	AAV	CamKIIa	aIC	aIC 1294	1.65	Medulla	Hindbrain	-5.7	1288	531814	0.002	0.00316222	0.406504	NaN	NaN
656	AAV	CamKIIa	aIC	aIC 1294	1.65	Medulla	Hindbrain	-5.7	1671	113461	0.015	0.00410254	3.04878	NaN	NaN
657	AAV	CamKIIa	aIC	aIC 1294	1.65	Pedunculopontine Nucleus	Hindbrain	-5.7	1279	178064	0.007	0.00314013	1.42276	NaN	NaN
658	AAV	CamKIIa	aIC	aIC 1294	1.65	Raphe Nuclei	Midbrain	-5.7	1640	180714	0.009	0.00402643	1.82927	NaN	NaN
659	AAV	CamKIIa	aIC	aIC 1294	1.65	Raphe Nuclei	Midbrain	-5.7	4510	111593	0.04	0.0110727	8.13008	NaN	NaN
660	AAV	CamKIIa	aIC	aIC 1294	1.65	Pedunculopontine Nucleus	Hindbrain	-5.9	1840	555026	0.003	0.00451746	0.609756	NaN	NaN
661	AAV	CamKIIa	aIC	aIC 1294	1.65	Medulla	Hindbrain	-5.9	8552	403953	0.021	0.0209964	4.26829	NaN	NaN
662	AAV	CamKIIa	aIC	aIC 1294	1.65	Medulla	Hindbrain	-5.9	10984	584832	0.019	0.0269673	3.86179	NaN	NaN
663	AAV	CamKIIa	aIC	aIC 1294	1.65	Medulla	Hindbrain	-5.9	1160	165389	0.007	0.00284796	1.42276	NaN	NaN
664	AAV	CamKIIa	aIC	aIC 1294	1.65	Pedunculopontine Nucleus	Hindbrain	-5.9	1348	123059	0.011	0.00330953	2.23577	NaN	NaN
665	AAV	CamKIIa	aIC	aIC 1294	1.65	Raphe Nuclei	Midbrain	-5.9	1785	105629	0.017	0.00438243	3.45528	NaN	NaN
666	AAV	CamKIIa	aIC	aIC 1294	1.65	Medulla	Hindbrain	-5.9	12522	357871	0.035	0.0307433	7.11382	NaN	NaN
667	AAV	CamKIIa	aIC	aIC 1294	1.65	Pedunculopontine Nucleus	Hindbrain	-6.1	3574	555026	0.006	0.00877468	1.21951	NaN	NaN
668	AAV	CamKIIa	aIC	aIC 1294	1.65	Medulla	Hindbrain	-6.1	6964	300576	0.023	0.0170976	4.6748	NaN	NaN
669	AAV	CamKIIa	aIC	aIC 1294	1.65	Medulla	Hindbrain	-6.1	6099	584832	0.01	0.0149739	2.03252	NaN	NaN
670	AAV	CamKIIa	aIC	aIC 1294	1.65	Pedunculopontine Nucleus	Hindbrain	-6.1	1066	123059	0.009	0.00261718	1.82927	NaN	NaN
671	AAV	CamKIIa	aIC	aIC 1294	1.65	Raphe Nuclei	Midbrain	-6.1	506	105629	0.005	0.0012423	1.01626	NaN	NaN
672	AAV	CamKIIa	aIC	aIC 1294	1.65	Medulla	Hindbrain	-6.1	12781	336983	0.038	0.0313792	7.72358	NaN	NaN
673	AAV	CamKIIa	aIC	aIC 1294	1.65	Medulla	Hindbrain	-6.1	1078	164056	0.007	0.00264664	1.42276	NaN	NaN
674	AAV	CamKIIa	aIC	aIC 1294	1.65	Medial Prefrontal Cortex	Prefrontal Cortex	0	105	355975	0.000295	0.00025779	0.0599593	NaN	NaN
675	AAV	CamKIIa	aIC	aIC 1294	1.65	Cingulate Cortex	Prefrontal Cortex	0	630	465373	0.001	0.00154674	0.203252	NaN	NaN
676	AAV	CamKIIa	aIC	aIC 1294	1.65	Motor Cortex, secondary	Motor Cortex	0	6061	800946	0.008	0.0148806	1.62602	NaN	NaN
677	AAV	CamKIIa	aIC	aIC 1294	1.65	Motor Cortex, primary	Motor Cortex	0	8747	813768	0.011	0.0214751	2.23577	NaN	NaN
678	AAV	CamKIIa	aIC	aIC 1294	1.65	Somatosensory Cortex, primary	Sensory Cortex	0	67407	3.82285e+06	0.018	0.165494	3.65854	NaN	NaN
679	AAV	CamKIIa	aIC	aIC 1294	1.65	Somatosensory Cortex, secondary	Sensory Cortex	0	94571	1.03543e+06	0.091	0.232185	18.4959	NaN	NaN
680	AAV	CamKIIa	aIC	aIC 1294	1.65	Granular Insular Cortex	Insular Cortex	0	39361	340593	0.116	0.0966368	23.5772	NaN	NaN
681	AAV	CamKIIa	aIC	aIC 1294	1.65	Dysgranular Insular Cortex	Insular Cortex	0	10490	257591	0.041	0.0257544	8.33333	NaN	NaN
682	AAV	CamKIIa	aIC	aIC 1294	1.65	Agranular Insular Cortex, posterior	Insular Cortex	0	4255	273318	0.016	0.0104466	3.25203	NaN	NaN
683	AAV	CamKIIa	aIC	aIC 1294	1.65	Piriform Area	Piriform Cortex	0	335	1.33286e+06	0.0002513	0.000822472	0.0510772	NaN	NaN
684	AAV	CamKIIa	aIC	aIC 1294	1.65	Endopiriform Nucleus	Olfactory areas	0	1011	334435	0.003	0.00248215	0.609756	NaN	NaN
685	AAV	CamKIIa	aIC	aIC 1294	1.65	Caudate Putamen	Striatum	0	646075	5.04703e+06	0.128	1.58621	26.0163	NaN	NaN
686	AAV	CamKIIa	aIC	aIC 1294	1.65	Globus Pallidus	Pallidum	0	1018	360221	0.003	0.00249933	0.609756	NaN	NaN
687	AAV	CamKIIa	aIC	aIC 1294	1.65	Fundus of Striatum (IPAC)	Striatum	0	28523	355099	0.08	0.070028	16.2602	NaN	NaN
688	AAV	CamKIIa	aIC	aIC 1294	1.65	Ventral Pallidum	Pallidum	0	19761	1.05529e+06	0.019	0.0485161	3.86179	NaN	NaN
689	AAV	CamKIIa	aIC	aIC 1294	1.65	Basal Forebrain	Basal Forebrain	0	167	224986	0.0007423	0.000410009	0.150874	NaN	NaN
690	AAV	CamKIIa	aIC	aIC 1294	1.65	Piriform-Amygdalar Area	Olfactory areas	0	80	260649	0.0003069	0.000196411	0.062378	NaN	NaN
691	AAV	CamKIIa	aIC	aIC 1294	1.65	Olfactory Tubercle	Striatum	0	319	269790	0.001	0.00078319	0.203252	NaN	NaN
692	AAV	CamKIIa	aIC	aIC 1294	1.65	Anterior Amygdaloid Area	Amygdala	0	682	125697	0.005	0.00167441	1.01626	NaN	NaN
693	AAV	CamKIIa	aIC	aIC 1294	1.65	Bed Nuclei of the Stria Terminalis (BNST)	Pallidum	0	44	516378	8.52e-05	0.000108026	0.0173171	NaN	NaN
694	AAV	CamKIIa	aIC	aIC 1294	1.65	Claustrum	Claustrum	0	9405	212736	0.044	0.0230906	8.94309	NaN	NaN
695	AAV	CamKIIa	aIC	aIC 1294	1.65	Basal Forebrain	Basal Forebrain	0	904	288996	0.003	0.00221945	0.609756	NaN	NaN
696	AAV	CamKIIa	aIC	aIC 1294	1.65	Medial Prefrontal Cortex	Prefrontal Cortex	0.1	637	362392	0.002	0.00156393	0.406504	NaN	NaN
697	AAV	CamKIIa	aIC	aIC 1294	1.65	Cingulate Cortex	Prefrontal Cortex	0.1	6145	458076	0.013	0.0150868	2.64228	NaN	NaN
698	AAV	CamKIIa	aIC	aIC 1294	1.65	Motor Cortex, secondary	Motor Cortex	0.1	13732	634187	0.022	0.033714	4.47154	NaN	NaN
699	AAV	CamKIIa	aIC	aIC 1294	1.65	Motor Cortex, primary	Motor Cortex	0.1	21453	568784	0.038	0.0526702	7.72358	NaN	NaN
700	AAV	CamKIIa	aIC	aIC 1294	1.65	Somatosensory Cortex, primary	Sensory Cortex	0.1	229412	3.78058e+06	0.061	0.563239	12.3984	NaN	NaN
701	AAV	CamKIIa	aIC	aIC 1294	1.65	Somatosensory Cortex, secondary	Sensory Cortex	0.1	161616	834331	0.194	0.39679	39.4309	NaN	NaN
702	AAV	CamKIIa	aIC	aIC 1294	1.65	Granular Insular Cortex	Insular Cortex	0.1	40542	246568	0.164	0.0995363	33.3333	NaN	NaN
703	AAV	CamKIIa	aIC	aIC 1294	1.65	Dysgranular Insular Cortex	Insular Cortex	0.1	18652	206841	0.09	0.0457933	18.2927	NaN	NaN
704	AAV	CamKIIa	aIC	aIC 1294	1.65	Agranular Insular Cortex, posterior	Insular Cortex	0.1	6800	338782	0.02	0.016695	4.06504	NaN	NaN
705	AAV	CamKIIa	aIC	aIC 1294	1.65	Piriform Area	Piriform Cortex	0.1	642	1.67424e+06	0.0003835	0.0015762	0.0779472	NaN	NaN
706	AAV	CamKIIa	aIC	aIC 1294	1.65	Ventral Pallidum	Pallidum	0.1	7387	742191	0.01	0.0181361	2.03252	NaN	NaN
707	AAV	CamKIIa	aIC	aIC 1294	1.65	Basal Forebrain	Basal Forebrain	0.1	239	253375	0.0009433	0.000586779	0.191728	NaN	NaN
708	AAV	CamKIIa	aIC	aIC 1294	1.65	Olfactory Tubercle	Striatum	0.1	1561	492654	0.003	0.00383248	0.609756	NaN	NaN
709	AAV	CamKIIa	aIC	aIC 1294	1.65	Claustrum	Claustrum	0.1	10383	161853	0.064	0.0254917	13.0081	NaN	NaN
710	AAV	CamKIIa	aIC	aIC 1294	1.65	Endopiriform Nucleus	Olfactory areas	0.1	1118	245073	0.005	0.00274485	1.01626	NaN	NaN
711	AAV	CamKIIa	aIC	aIC 1294	1.65	Caudate Putamen	Striatum	0.1	805286	5.20753e+06	0.155	1.97709	31.5041	NaN	NaN
712	AAV	CamKIIa	aIC	aIC 1294	1.65	Basal Forebrain	Basal Forebrain	0.1	1342	443758	0.003	0.0032948	0.609756	NaN	NaN
713	AAV	CamKIIa	aIC	aIC 1294	1.65	Fundus of Striatum (IPAC)	Striatum	0.1	19342	452215	0.043	0.0474873	8.73984	NaN	NaN
714	AAV	CamKIIa	aIC	aIC 1294	1.65	Bed Nuclei of the Stria Terminalis (BNST)	Pallidum	0.1	1375	677719	0.002	0.00337582	0.406504	NaN	NaN
715	AAV	CamKIIa	aIC	aIC 1294	1.65	Medial Prefrontal Cortex	Prefrontal Cortex	0.3	430	409701	0.001	0.00105571	0.203252	NaN	NaN
716	AAV	CamKIIa	aIC	aIC 1294	1.65	Cingulate Cortex	Prefrontal Cortex	0.3	1200	423572	0.003	0.00294617	0.609756	NaN	NaN
717	AAV	CamKIIa	aIC	aIC 1294	1.65	Motor Cortex, secondary	Motor Cortex	0.3	7887	719788	0.011	0.0193637	2.23577	NaN	NaN
718	AAV	CamKIIa	aIC	aIC 1294	1.65	Motor Cortex, primary	Motor Cortex	0.3	28477	845520	0.034	0.0699151	6.91057	NaN	NaN
719	AAV	CamKIIa	aIC	aIC 1294	1.65	Somatosensory Cortex, primary	Sensory Cortex	0.3	204920	3.66292e+06	0.056	0.503108	11.3821	NaN	NaN
720	AAV	CamKIIa	aIC	aIC 1294	1.65	Somatosensory Cortex, secondary	Sensory Cortex	0.3	169089	1017828	0.166	0.415137	33.7398	NaN	NaN
721	AAV	CamKIIa	aIC	aIC 1294	1.65	Granular Insular Cortex	Insular Cortex	0.3	38305	225516	0.17	0.0940442	34.5528	NaN	NaN
722	AAV	CamKIIa	aIC	aIC 1294	1.65	Dysgranular Insular Cortex	Insular Cortex	0.3	21959	178511	0.123	0.0539125	25	NaN	NaN
723	AAV	CamKIIa	aIC	aIC 1294	1.65	Agranular Insular Cortex, posterior	Insular Cortex	0.3	15251	438178	0.035	0.0374434	7.11382	NaN	NaN
724	AAV	CamKIIa	aIC	aIC 1294	1.65	Piriform Area	Piriform Cortex	0.3	2829	1.86354e+06	0.002	0.0069456	0.406504	NaN	NaN
725	AAV	CamKIIa	aIC	aIC 1294	1.65	Fundus of Striatum (IPAC)	Striatum	0.3	22924	427282	0.054	0.0562817	10.9756	NaN	NaN
726	AAV	CamKIIa	aIC	aIC 1294	1.65	Ventral Pallidum	Pallidum	0.3	8323	821650	0.01	0.0204341	2.03252	NaN	NaN
727	AAV	CamKIIa	aIC	aIC 1294	1.65	Basal Forebrain	Basal Forebrain	0.3	226	146441	0.002	0.000554862	0.406504	NaN	NaN
728	AAV	CamKIIa	aIC	aIC 1294	1.65	Olfactory Tubercle	Striatum	0.3	1059	404673	0.003	0.00259999	0.609756	NaN	NaN
729	AAV	CamKIIa	aIC	aIC 1294	1.65	Claustrum	Claustrum	0.3	9264	182086	0.051	0.0227444	10.3659	NaN	NaN
730	AAV	CamKIIa	aIC	aIC 1294	1.65	Endopiriform Nucleus	Olfactory areas	0.3	2235	184240	0.012	0.00548724	2.43902	NaN	NaN
731	AAV	CamKIIa	aIC	aIC 1294	1.65	Caudate Putamen	Striatum	0.3	796377	4.82437e+06	0.165	1.95522	33.5366	NaN	NaN
732	AAV	CamKIIa	aIC	aIC 1294	1.65	Bed Nuclei of the Stria Terminalis (BNST)	Pallidum	0.3	39919	716337	0.056	0.0980068	11.3821	NaN	NaN
733	AAV	CamKIIa	aIC	aIC 1294	1.65	Basal Forebrain	Basal Forebrain	0.3	470	427088	0.001	0.00115392	0.203252	NaN	NaN
734	AAV	CamKIIa	aIC	aIC 1294	1.65	Medial Prefrontal Cortex	Prefrontal Cortex	0.5	230	345885	0.000665	0.000564683	0.135163	NaN	NaN
735	AAV	CamKIIa	aIC	aIC 1294	1.65	Motor Cortex, secondary	Motor Cortex	0.5	36351	1.20326e+06	0.03	0.0892469	6.09756	NaN	NaN
736	AAV	CamKIIa	aIC	aIC 1294	1.65	Motor Cortex, primary	Motor Cortex	0.5	65739	1.22337e+06	0.054	0.161399	10.9756	NaN	NaN
737	AAV	CamKIIa	aIC	aIC 1294	1.65	Somatosensory Cortex, primary	Sensory Cortex	0.5	151745	2.5186e+06	0.06	0.372555	12.1951	NaN	NaN
738	AAV	CamKIIa	aIC	aIC 1294	1.65	Dysgranular Insular Cortex	Insular Cortex	0.5	28326	148944	0.19	0.0695443	38.6179	NaN	NaN
739	AAV	CamKIIa	aIC	aIC 1294	1.65	Agranular Insular Cortex, dorsal	Insular Cortex	0.5	48841	367582	0.133	0.119912	27.0325	NaN	NaN
740	AAV	CamKIIa	aIC	aIC 1294	1.65	Agranular Insular Cortex, ventral	Insular Cortex	0.5	10037	432009	0.023	0.0246423	4.6748	NaN	NaN
741	AAV	CamKIIa	aIC	aIC 1294	1.65	Nucleus Accumbens, core	Striatum	0.5	174668	648147	0.269	0.428835	54.6748	NaN	NaN
742	AAV	CamKIIa	aIC	aIC 1294	1.65	Caudate Putamen	Striatum	0.5	613505	4.45378e+06	0.138	1.50624	28.0488	NaN	NaN
743	AAV	CamKIIa	aIC	aIC 1294	1.65	Granular Insular Cortex	Insular Cortex	0.5	32647	184203	0.177	0.080153	35.9756	NaN	NaN
744	AAV	CamKIIa	aIC	aIC 1294	1.65	Cingulate Cortex	Prefrontal Cortex	0.5	1003	347790	0.003	0.00246251	0.609756	NaN	NaN
745	AAV	CamKIIa	aIC	aIC 1294	1.65	Somatosensory Cortex, secondary	Sensory Cortex	0.5	66773	658162	0.101	0.163937	20.5285	NaN	NaN
746	AAV	CamKIIa	aIC	aIC 1294	1.65	Claustrum	Claustrum	0.5	36904	184844	0.2	0.0906045	40.6504	NaN	NaN
747	AAV	CamKIIa	aIC	aIC 1294	1.65	Endopiriform Nucleus	Olfactory areas	0.5	747	203266	0.004	0.00183399	0.813008	NaN	NaN
748	AAV	CamKIIa	aIC	aIC 1294	1.65	Piriform Area	Piriform Cortex	0.5	466	1.46238e+06	0.0003187	0.0011441	0.0647764	NaN	NaN
749	AAV	CamKIIa	aIC	aIC 1294	1.65	Bed Nuclei of the Stria Terminalis (BNST)	Pallidum	0.5	3173	294294	0.011	0.00779016	2.23577	NaN	NaN
750	AAV	CamKIIa	aIC	aIC 1294	1.65	Olfactory Tubercle	Striatum	0.5	1423	1.25264e+06	0.001	0.00349367	0.203252	NaN	NaN
751	AAV	CamKIIa	aIC	aIC 1294	1.65	Ventral Pallidum	Pallidum	0.5	13379	900506	0.015	0.0328473	3.04878	NaN	NaN
752	AAV	CamKIIa	aIC	aIC 1294	1.65	Medial Prefrontal Cortex	Prefrontal Cortex	0.7	149	345885	0.0004308	0.000365816	0.087561	NaN	NaN
753	AAV	CamKIIa	aIC	aIC 1294	1.65	Motor Cortex, secondary	Motor Cortex	0.7	46748	1.24351e+06	0.038	0.114773	7.72358	NaN	NaN
754	AAV	CamKIIa	aIC	aIC 1294	1.65	Motor Cortex, primary	Motor Cortex	0.7	176618	2.02176e+06	0.087	0.433622	17.6829	NaN	NaN
755	AAV	CamKIIa	aIC	aIC 1294	1.65	Somatosensory Cortex, primary	Sensory Cortex	0.7	264989	1.88518e+06	0.141	0.650586	28.6585	NaN	NaN
756	AAV	CamKIIa	aIC	aIC 1294	1.65	Dysgranular Insular Cortex	Insular Cortex	0.7	69310	208918	0.332	0.170166	67.4797	NaN	NaN
757	AAV	CamKIIa	aIC	aIC 1294	1.65	Agranular Insular Cortex, dorsal	Insular Cortex	0.7	27528	318898	0.086	0.0675851	17.4797	NaN	NaN
758	AAV	CamKIIa	aIC	aIC 1294	1.65	Agranular Insular Cortex, ventral	Insular Cortex	0.7	715	350807	0.002	0.00175543	0.406504	NaN	NaN
759	AAV	CamKIIa	aIC	aIC 1294	1.65	Nucleus Accumbens, core	Striatum	0.7	221243	945061	0.234	0.543183	47.561	NaN	NaN
760	AAV	CamKIIa	aIC	aIC 1294	1.65	Caudate Putamen	Striatum	0.7	665525	3.79819e+06	0.175	1.63396	35.5691	NaN	NaN
761	AAV	CamKIIa	aIC	aIC 1294	1.65	Granular Insular Cortex	Insular Cortex	0.7	65728	210232	0.313	0.161372	63.6179	NaN	NaN
762	AAV	CamKIIa	aIC	aIC 1294	1.65	Cingulate Cortex	Prefrontal Cortex	0.7	1350	347790	0.004	0.00331444	0.813008	NaN	NaN
763	AAV	CamKIIa	aIC	aIC 1294	1.65	Somatosensory Cortex, secondary	Sensory Cortex	0.7	149936	709659	0.211	0.368114	42.8862	NaN	NaN
764	AAV	CamKIIa	aIC	aIC 1294	1.65	Claustrum	Claustrum	0.7	19332	184844	0.105	0.0474628	21.3415	NaN	NaN
765	AAV	CamKIIa	aIC	aIC 1294	1.65	Endopiriform Nucleus	Olfactory areas	0.7	1598	199307	0.008	0.00392332	1.62602	NaN	NaN
766	AAV	CamKIIa	aIC	aIC 1294	1.65	Piriform Area	Piriform Cortex	0.7	6146	1.31394e+06	0.005	0.0150893	1.01626	NaN	NaN
767	AAV	CamKIIa	aIC	aIC 1294	1.65	Olfactory Tubercle	Striatum	0.7	3664	948687	0.004	0.00899564	0.813008	NaN	NaN
768	AAV	CamKIIa	aIC	aIC 1294	1.65	Nucleus Accumbens, shell	Striatum	0.7	42673	881847	0.048	0.104768	9.7561	NaN	NaN
769	AAV	CamKIIa	aIC	aIC 1294	1.65	Cingulate Cortex	Prefrontal Cortex	0.9	2173	379131	0.006	0.00533502	1.21951	NaN	NaN
770	AAV	CamKIIa	aIC	aIC 1294	1.65	Medial Prefrontal Cortex	Prefrontal Cortex	0.9	280	429569	0.0006518	0.00068744	0.13248	NaN	NaN
771	AAV	CamKIIa	aIC	aIC 1294	1.65	Motor Cortex, secondary	Motor Cortex	0.9	28543	1.1493e+06	0.025	0.0700771	5.0813	NaN	NaN
772	AAV	CamKIIa	aIC	aIC 1294	1.65	Motor Cortex, primary	Motor Cortex	0.9	121737	1.99196e+06	0.061	0.298882	12.3984	NaN	NaN
773	AAV	CamKIIa	aIC	aIC 1294	1.65	Somatosensory Cortex, primary	Sensory Cortex	0.9	171824	1.82993e+06	0.094	0.421852	19.1057	NaN	NaN
774	AAV	CamKIIa	aIC	aIC 1294	1.65	Dysgranular Insular Cortex	Insular Cortex	0.9	80632	262856	0.307	0.197963	62.3984	NaN	NaN
775	AAV	CamKIIa	aIC	aIC 1294	1.65	Agranular Insular Cortex, dorsal	Insular Cortex	0.9	114290	356773	0.32	0.280598	65.0407	NaN	NaN
776	AAV	CamKIIa	aIC	aIC 1294	1.65	Agranular Insular Cortex, ventral	Insular Cortex	0.9	6553	350313	0.019	0.0160885	3.86179	NaN	NaN
777	AAV	CamKIIa	aIC	aIC 1294	1.65	Piriform Area	Piriform Cortex	0.9	5095	1.17623e+06	0.004	0.0125089	0.813008	NaN	NaN
778	AAV	CamKIIa	aIC	aIC 1294	1.65	Nucleus Accumbens, shell	Striatum	0.9	48265	1.74656e+06	0.028	0.118497	5.69106	NaN	NaN
779	AAV	CamKIIa	aIC	aIC 1294	1.65	Nucleus Accumbens, core	Striatum	0.9	247477	1.23465e+06	0.2	0.607591	40.6504	NaN	NaN
780	AAV	CamKIIa	aIC	aIC 1294	1.65	Granular Insular Cortex	Insular Cortex	0.9	81653	307438	0.266	0.20047	54.065	NaN	NaN
781	AAV	CamKIIa	aIC	aIC 1294	1.65	Claustrum	Claustrum	0.9	38720	218907	0.177	0.0950631	35.9756	NaN	NaN
782	AAV	CamKIIa	aIC	aIC 1294	1.65	Caudate Putamen	Striatum	0.9	417375	3.07261e+06	0.136	1.02471	27.6423	NaN	NaN
783	AAV	CamKIIa	aIC	aIC 1294	1.65	Olfactory Tubercle	Striatum	0.9	7398	781679	0.009	0.0181631	1.82927	NaN	NaN
784	AAV	CamKIIa	aIC	aIC 1294	1.65	Endopiriform Nucleus	Olfactory areas	0.9	1647	176190	0.009	0.00404362	1.82927	NaN	NaN
785	AAV	CamKIIa	aIC	aIC 1294	1.65	Somatosensory Cortex, secondary	Sensory Cortex	0.9	100839	503651	0.2	0.247574	40.6504	NaN	NaN
786	AAV	CamKIIa	aIC	aIC 1294	1.65	Cingulate Cortex	Prefrontal Cortex	1.1	1140	315474	0.004	0.00279886	0.813008	NaN	NaN
787	AAV	CamKIIa	aIC	aIC 1294	1.65	Medial Prefrontal Cortex	Prefrontal Cortex	1.1	5142	434479	0.012	0.0126243	2.43902	NaN	NaN
788	AAV	CamKIIa	aIC	aIC 1294	1.65	Motor Cortex, secondary	Motor Cortex	1.1	33166	1.22366e+06	0.027	0.0814272	5.4878	NaN	NaN
789	AAV	CamKIIa	aIC	aIC 1294	1.65	Motor Cortex, primary	Motor Cortex	1.1	187513	2.35108e+06	0.08	0.460371	16.2602	NaN	NaN
790	AAV	CamKIIa	aIC	aIC 1294	1.65	Somatosensory Cortex, primary	Sensory Cortex	1.1	308820	1.58373e+06	0.195	0.758197	39.6341	NaN	NaN
791	AAV	CamKIIa	aIC	aIC 1294	1.65	Dysgranular Insular Cortex	Insular Cortex	1.1	135093	364472	0.371	0.331672	75.4065	NaN	NaN
792	AAV	CamKIIa	aIC	aIC 1294	1.65	Agranular Insular Cortex, dorsal	Insular Cortex	1.1	205958	493426	0.417	0.505656	84.7561	NaN	NaN
793	AAV	CamKIIa	aIC	aIC 1294	1.65	Agranular Insular Cortex, ventral	Insular Cortex	1.1	69609	433023	0.161	0.1709	32.7236	NaN	NaN
794	AAV	CamKIIa	aIC	aIC 1294	1.65	Piriform Area	Piriform Cortex	1.1	2083	1.18467e+06	0.002	0.00511406	0.406504	NaN	NaN
795	AAV	CamKIIa	aIC	aIC 1294	1.65	Nucleus Accumbens, shell	Striatum	1.1	38893	1.51313e+06	0.026	0.0954878	5.28455	NaN	NaN
796	AAV	CamKIIa	aIC	aIC 1294	1.65	Nucleus Accumbens, core	Striatum	1.1	252414	1187123	0.213	0.619712	43.2927	NaN	NaN
797	AAV	CamKIIa	aIC	aIC 1294	1.65	Granular Insular Cortex	Insular Cortex	1.1	114443	379944	0.301	0.280974	61.1789	NaN	NaN
798	AAV	CamKIIa	aIC	aIC 1294	1.65	Claustrum	Claustrum	1.1	31990	153856	0.208	0.07854	42.2764	NaN	NaN
799	AAV	CamKIIa	aIC	aIC 1294	1.65	Caudate Putamen	Striatum	1.1	326134	2.91857e+06	0.112	0.800705	22.7642	NaN	NaN
800	AAV	CamKIIa	aIC	aIC 1294	1.65	Olfactory Tubercle	Striatum	1.1	19696	1.09538e+06	0.018	0.0483565	3.65854	NaN	NaN
801	AAV	CamKIIa	aIC	aIC 1294	1.65	Endopiriform Nucleus	Olfactory areas	1.1	6754	163599	0.041	0.016582	8.33333	NaN	NaN
802	AAV	CamKIIa	aIC	aIC 1294	1.65	Motor Cortex, secondary	Motor Cortex	1.2	140561	1.8362e+06	0.077	0.345097	15.6504	NaN	NaN
803	AAV	CamKIIa	aIC	aIC 1294	1.65	Somatosensory Cortex, primary	Sensory Cortex	1.2	156839	1393854	0.113	0.385062	22.9675	NaN	NaN
804	AAV	CamKIIa	aIC	aIC 1294	1.65	Medial Prefrontal Cortex	Prefrontal Cortex	1.2	6644	525164	0.013	0.016312	2.64228	NaN	NaN
805	AAV	CamKIIa	aIC	aIC 1294	1.65	Cingulate Cortex	Prefrontal Cortex	1.2	24819	640399	0.039	0.0609342	7.92683	NaN	NaN
806	AAV	CamKIIa	aIC	aIC 1294	1.65	Motor Cortex, primary	Motor Cortex	1.2	174370	2.07975e+06	0.084	0.428103	17.0732	NaN	NaN
807	AAV	CamKIIa	aIC	aIC 1294	1.65	Nucleus Accumbens, core	Striatum	1.2	0	0		0		NaN	NaN
808	AAV	CamKIIa	aIC	aIC 1294	1.65	Substantia Nigra	Midbrain	1.2	34206	235449	0.145	0.0839806	29.4715	NaN	NaN
809	AAV	CamKIIa	aIC	aIC 1294	1.65	Caudate Putamen	Striatum	1.2	45585	2639679	0.017	0.111918	3.45528	NaN	NaN
810	AAV	CamKIIa	aIC	aIC 1294	1.65	Nucleus Accumbens, core	Striatum	1.2	1138	1.28725e+06	0.0008841	0.00279395	0.179695	NaN	NaN
811	AAV	CamKIIa	aIC	aIC 1294	1.65	Cingulate Cortex	Prefrontal Cortex	1.2	196567	674930	0.291	0.4826	59.1463	NaN	NaN
812	AAV	CamKIIa	aIC	aIC 1294	1.65	Motor Cortex, secondary	Motor Cortex	1.4	118872	1.85709e+06	0.064	0.291848	13.0081	NaN	NaN
813	AAV	CamKIIa	aIC	aIC 1294	1.65	Somatosensory Cortex, primary	Sensory Cortex	1.4	615111	1.4773e+06	0.416	1.51018	84.5528	NaN	NaN
814	AAV	CamKIIa	aIC	aIC 1294	1.65	Medial Prefrontal Cortex	Prefrontal Cortex	1.4	170	472973	0.0003594	0.000417374	0.0730488	NaN	NaN
815	AAV	CamKIIa	aIC	aIC 1294	1.65	Cingulate Cortex	Prefrontal Cortex	1.4	2066	535644	0.004	0.00507232	0.813008	NaN	NaN
816	AAV	CamKIIa	aIC	aIC 1294	1.65	Medial Prefrontal Cortex	Prefrontal Cortex	1.4	160	369946	0.0004325	0.000392823	0.0879065	NaN	NaN
817	AAV	CamKIIa	aIC	aIC 1294	1.65	Medial Prefrontal Cortex	Prefrontal Cortex	1.4	58	256272	0.0002263	0.000142398	0.0459959	NaN	NaN
818	AAV	CamKIIa	aIC	aIC 1294	1.65	Motor Cortex, primary	Motor Cortex	1.4	454836	2.43363e+06	0.187	1.11669	38.0081	NaN	NaN
819	AAV	CamKIIa	aIC	aIC 1294	1.65	Nucleus Accumbens, core	Striatum	1.4	0	0		0		NaN	NaN
820	AAV	CamKIIa	aIC	aIC 1294	1.65	Substantia Nigra	Midbrain	1.4	54721	255370	0.214	0.134348	43.4959	NaN	NaN
821	AAV	CamKIIa	aIC	aIC 1294	1.65	Endopiriform Nucleus	Olfactory areas	1.4	10808	665589	0.016	0.0265352	3.25203	NaN	NaN
822	AAV	CamKIIa	aIC	aIC 1294	1.65	Olfactory Tubercle	Striatum	1.4	25175	1384201	0.018	0.0618082	3.65854	NaN	NaN
823	AAV	CamKIIa	aIC	aIC 1294	1.65	Tenia Tecta	Olfactory areas	1.4	3	551452	5.44e-06	7.36542e-06	0.00110569	NaN	NaN
824	AAV	CamKIIa	aIC	aIC 1294	1.65	Caudate Putamen	Striatum	1.4	128209	2.11182e+06	0.061	0.314771	12.3984	NaN	NaN
825	AAV	CamKIIa	aIC	aIC 1294	1.65	Nucleus Accumbens, core	Striatum	1.4	155328	1.25504e+06	0.124	0.381352	25.2033	NaN	NaN
826	AAV	CamKIIa	aIC	aIC 1294	1.65	Nucleus Accumbens, shell	Striatum	1.4	27284	1.4762e+06	0.018	0.0669861	3.65854	NaN	NaN
827	AAV	CamKIIa	aIC	aIC 1294	1.65	Piriform Area	Piriform Cortex	1.4	906	1.00644e+06	0.0009002	0.00222436	0.182967	NaN	NaN
828	AAV	CamKIIa	aIC	aIC 1294	1.65	Motor Cortex, secondary	Motor Cortex	1.5	146506	1.93191e+06	0.076	0.359693	15.4472	NaN	NaN
829	AAV	CamKIIa	aIC	aIC 1294	1.65	Somatosensory Cortex, primary	Sensory Cortex	1.5	627086	1.46749e+06	0.427	1.53958	86.7886	NaN	NaN
830	AAV	CamKIIa	aIC	aIC 1294	1.65	Medial Prefrontal Cortex	Prefrontal Cortex	1.5	175	434712	0.0004026	0.00042965	0.0818293	NaN	NaN
831	AAV	CamKIIa	aIC	aIC 1294	1.65	Cingulate Cortex	Prefrontal Cortex	1.5	1150	513157	0.002	0.00282341	0.406504	NaN	NaN
832	AAV	CamKIIa	aIC	aIC 1294	1.65	Medial Prefrontal Cortex	Prefrontal Cortex	1.5	21	287642	7.3e-05	5.1558e-05	0.0148374	NaN	NaN
833	AAV	CamKIIa	aIC	aIC 1294	1.65	Medial Prefrontal Cortex	Prefrontal Cortex	1.5	134	265478	0.0005047	0.000328989	0.102581	NaN	NaN
834	AAV	CamKIIa	aIC	aIC 1294	1.65	Motor Cortex, primary	Motor Cortex	1.5	305626	1.96085e+06	0.156	0.750355	31.7073	NaN	NaN
835	AAV	CamKIIa	aIC	aIC 1294	1.65	Piriform Area	Piriform Cortex	1.5	1722	1.24062e+06	0.001	0.00422775	0.203252	NaN	NaN
836	AAV	CamKIIa	aIC	aIC 1294	1.65	Caudate Putamen	Striatum	1.5	65334	1.96845e+06	0.033	0.160404	6.70732	NaN	NaN
837	AAV	CamKIIa	aIC	aIC 1294	1.65	Nucleus Accumbens, core	Striatum	1.5	68958	1.08887e+06	0.063	0.169302	12.8049	NaN	NaN
838	AAV	CamKIIa	aIC	aIC 1294	1.65	Substantia Nigra	Midbrain	1.5	111530	229314	0.486	0.273822	98.7805	NaN	NaN
839	AAV	CamKIIa	aIC	aIC 1294	1.65	Endopiriform Nucleus	Olfactory areas	1.5	49378	784778	0.063	0.12123	12.8049	NaN	NaN
840	AAV	CamKIIa	aIC	aIC 1294	1.65	Olfactory Tubercle	Striatum	1.5	14037	1.13982e+06	0.012	0.0344628	2.43902	NaN	NaN
841	AAV	CamKIIa	aIC	aIC 1294	1.65	Nucleus Accumbens, shell	Striatum	1.5	1697	1.45934e+06	0.001	0.00416638	0.203252	NaN	NaN
842	AAV	CamKIIa	aIC	aIC 1294	1.65	Tenia Tecta	Olfactory areas	1.5	31	476645	6.5e-05	7.61094e-05	0.0132114	NaN	NaN
843	AAV	CamKIIa	aIC	aIC 1294	1.65	Motor Cortex, secondary	Motor Cortex	1.8	432212	1628809	0.265	1.06114	53.8618	NaN	NaN
844	AAV	CamKIIa	aIC	aIC 1294	1.65	Somatosensory Cortex, primary	Sensory Cortex	1.8	615635	1.27585e+06	0.483	1.51147	98.1707	NaN	NaN
845	AAV	CamKIIa	aIC	aIC 1294	1.65	Medial Prefrontal Cortex	Prefrontal Cortex	1.8	1059	395097	0.003	0.00259999	0.609756	NaN	NaN
846	AAV	CamKIIa	aIC	aIC 1294	1.65	Piriform Area	Piriform Cortex	1.8	79329	1329027	0.06	0.194764	12.1951	NaN	NaN
847	AAV	CamKIIa	aIC	aIC 1294	1.65	Nucleus Accumbens, shell	Striatum	1.8	24857	1.30029e+06	0.019	0.0610275	3.86179	NaN	NaN
848	AAV	CamKIIa	aIC	aIC 1294	1.65	Cingulate Cortex	Prefrontal Cortex	1.8	8221	319413	0.026	0.0201837	5.28455	NaN	NaN
849	AAV	CamKIIa	aIC	aIC 1294	1.65	Medial Prefrontal Cortex	Prefrontal Cortex	1.8	3256	336469	0.01	0.00799394	2.03252	NaN	NaN
850	AAV	CamKIIa	aIC	aIC 1294	1.65	Medial Prefrontal Cortex	Prefrontal Cortex	1.8	1013	344619	0.003	0.00248706	0.609756	NaN	NaN
851	AAV	CamKIIa	aIC	aIC 1294	1.65	Nucleus Accumbens, core	Striatum	1.8	43313	787944	0.055	0.10634	11.1789	NaN	NaN
852	AAV	CamKIIa	aIC	aIC 1294	1.65	Olfactory Tubercle	Striatum	1.8	15545	779500	0.02	0.0381652	4.06504	NaN	NaN
853	AAV	CamKIIa	aIC	aIC 1294	1.65	Motor Cortex, primary	Motor Cortex	1.8	677972	1.65342e+06	0.41	1.66452	83.3333	NaN	NaN
854	AAV	CamKIIa	aIC	aIC 1294	1.65	Caudate Putamen	Striatum	1.8	16636	235339	0.071	0.0408437	14.4309	NaN	NaN
855	AAV	CamKIIa	aIC	aIC 1294	1.65	Tenia Tecta	Olfactory areas	1.8	1003	944522	0.001	0.00246251	0.203252	NaN	NaN
856	AAV	CamKIIa	aIC	aIC 1294	1.65	Endopiriform Nucleus	Olfactory areas	1.8	16467	540360	0.03	0.0404288	6.09756	NaN	NaN
857	AAV	CamKIIa	aIC	aIC 1294	1.65	Substantia Nigra	Midbrain	1.8	81317	393641	0.207	0.199645	42.0732	NaN	NaN
858	AAV	CamKIIa	aIC	aIC 1294	1.65	Motor Cortex, secondary	Motor Cortex	1.7	191372	1628809	0.117	0.469845	23.7805	NaN	NaN
859	AAV	CamKIIa	aIC	aIC 1294	1.65	Somatosensory Cortex, primary	Sensory Cortex	1.7	648334	1.41095e+06	0.46	1.59175	93.4959	NaN	NaN
860	AAV	CamKIIa	aIC	aIC 1294	1.65	Medial Prefrontal Cortex	Prefrontal Cortex	1.7	474	395097	0.001	0.00116374	0.203252	NaN	NaN
861	AAV	CamKIIa	aIC	aIC 1294	1.65	Cingulate Cortex	Prefrontal Cortex	1.7	1655	319413	0.005	0.00406326	1.01626	NaN	NaN
862	AAV	CamKIIa	aIC	aIC 1294	1.65	Medial Prefrontal Cortex	Prefrontal Cortex	1.7	141	336469	0.0004191	0.000346175	0.0851829	NaN	NaN
863	AAV	CamKIIa	aIC	aIC 1294	1.65	Medial Prefrontal Cortex	Prefrontal Cortex	1.7	281	344619	0.0008154	0.000689895	0.165732	NaN	NaN
864	AAV	CamKIIa	aIC	aIC 1294	1.65	Olfactory Tubercle	Striatum	1.7	5942	1.01059e+06	0.006	0.0145885	1.21951	NaN	NaN
865	AAV	CamKIIa	aIC	aIC 1294	1.65	Motor Cortex, primary	Motor Cortex	1.7	438129	1.85643e+06	0.236	1.07567	47.9675	NaN	NaN
866	AAV	CamKIIa	aIC	aIC 1294	1.65	Tenia Tecta	Olfactory areas	1.7	100	632073	0.0001582	0.000245514	0.0321545	NaN	NaN
867	AAV	CamKIIa	aIC	aIC 1294	1.65	Substantia Nigra	Midbrain	1.7	33638	243116	0.138	0.0825861	28.0488	NaN	NaN
868	AAV	CamKIIa	aIC	aIC 1294	1.65	Orbitofrontal Cortex	Prefrontal Cortex	1.7	29265	352984	0.083	0.0718497	16.8699	NaN	NaN
869	AAV	CamKIIa	aIC	aIC 1294	1.65	Piriform Area	Piriform Cortex	1.7	13220	1.21251e+06	0.011	0.032457	2.23577	NaN	NaN
870	AAV	CamKIIa	aIC	aIC 1294	1.65	Endopiriform Nucleus	Olfactory areas	1.7	16820	641980	0.026	0.0412955	5.28455	NaN	NaN
871	AAV	CamKIIa	aIC	aIC 1294	1.65	Nucleus Accumbens, shell	Striatum	1.7	31058	1.63036e+06	0.019	0.0762518	3.86179	NaN	NaN
872	AAV	CamKIIa	aIC	aIC 1294	1.65	Caudate Putamen	Striatum	1.7	23249	1.18955e+06	0.02	0.0570796	4.06504	NaN	NaN
873	AAV	CamKIIa	aIC	aIC 1294	1.65	Nucleus Accumbens, core	Striatum	1.7	24104	790611	0.03	0.0591787	6.09756	NaN	NaN
874	AAV	CamKIIa	aIC	aIC 1294	1.65	Motor Cortex, secondary	Motor Cortex	1.9	328175	1.42024e+06	0.231	0.805716	46.9512	NaN	NaN
875	AAV	CamKIIa	aIC	aIC 1294	1.65	Somatosensory Cortex, primary	Sensory Cortex	1.9	837464	1.75493e+06	0.477	2.05609	96.9512	NaN	NaN
876	AAV	CamKIIa	aIC	aIC 1294	1.65	Orbitofrontal Cortex	Prefrontal Cortex	1.9	83154	517699	0.161	0.204155	32.7236	NaN	NaN
877	AAV	CamKIIa	aIC	aIC 1294	1.65	Medial Prefrontal Cortex	Prefrontal Cortex	1.9	3599	431823	0.008	0.00883605	1.62602	NaN	NaN
878	AAV	CamKIIa	aIC	aIC 1294	1.65	Piriform Area	Piriform Cortex	1.9	11828	987470	0.012	0.0290394	2.43902	NaN	NaN
879	AAV	CamKIIa	aIC	aIC 1294	1.65	Nucleus Accumbens, shell	Striatum	1.9	17598	903164	0.019	0.0432056	3.86179	NaN	NaN
880	AAV	CamKIIa	aIC	aIC 1294	1.65	Cingulate Cortex	Prefrontal Cortex	1.9	8374	338753	0.025	0.0205594	5.0813	NaN	NaN
881	AAV	CamKIIa	aIC	aIC 1294	1.65	Medial Prefrontal Cortex	Prefrontal Cortex	1.9	2078	351107	0.006	0.00510178	1.21951	NaN	NaN
882	AAV	CamKIIa	aIC	aIC 1294	1.65	Medial Prefrontal Cortex	Prefrontal Cortex	1.9	1042	383070	0.003	0.00255826	0.609756	NaN	NaN
883	AAV	CamKIIa	aIC	aIC 1294	1.65	Nucleus Accumbens, core	Striatum	1.9	20093	881283	0.023	0.0493312	4.6748	NaN	NaN
884	AAV	CamKIIa	aIC	aIC 1294	1.65	Olfactory Tubercle	Striatum	1.9	9170	779500	0.012	0.0225136	2.43902	NaN	NaN
885	AAV	CamKIIa	aIC	aIC 1294	1.65	Motor Cortex, primary	Motor Cortex	1.9	431425	1.04499e+06	0.413	1.05921	83.9431	NaN	NaN
886	AAV	CamKIIa	aIC	aIC 1294	1.65	Caudate Putamen	Striatum	1.9	7270	226707	0.032	0.0178489	6.50407	NaN	NaN
887	AAV	CamKIIa	aIC	aIC 1294	1.65	Tenia Tecta	Olfactory areas	1.9	2091	944808	0.002	0.0051337	0.406504	NaN	NaN
888	AAV	CamKIIa	aIC	aIC 1294	1.65	Endopiriform Nucleus	Olfactory areas	1.9	11249	617004	0.018	0.0276179	3.65854	NaN	NaN
889	AAV	CamKIIa	aIC	aIC 1294	1.65	Motor Cortex, primary	Motor Cortex	1.9	522835	1.17683e+06	0.444	1.28363	90.2439	NaN	NaN
890	AAV	CamKIIa	aIC	aIC 1294	1.65	Orbitofrontal Cortex	Prefrontal Cortex	1.9	129674	718015	0.181	0.318368	36.7886	NaN	NaN
891	AAV	CamKIIa	aIC	aIC 1294	1.65	Medial Prefrontal Cortex	Prefrontal Cortex	1.9	7845	402804	0.019	0.0192606	3.86179	NaN	NaN
892	AAV	CamKIIa	aIC	aIC 1294	1.65	Piriform Area	Piriform Cortex	1.9	6354	1.12854e+06	0.006	0.0156	1.21951	NaN	NaN
893	AAV	CamKIIa	aIC	aIC 1294	1.65	Endopiriform Nucleus	Olfactory areas	1.9	28943	834909	0.035	0.0710592	7.11382	NaN	NaN
894	AAV	CamKIIa	aIC	aIC 1294	1.65	Tenia Tecta	Olfactory areas	1.9	3282	767873	0.004	0.00805777	0.813008	NaN	NaN
895	AAV	CamKIIa	aIC	aIC 1294	1.65	Nucleus Accumbens, shell	Striatum	1.9	29833	793684	0.038	0.0732442	7.72358	NaN	NaN
896	AAV	CamKIIa	aIC	aIC 1294	1.65	Medial Prefrontal Cortex	Prefrontal Cortex	1.9	922	262266	0.004	0.00226364	0.813008	NaN	NaN
897	AAV	CamKIIa	aIC	aIC 1294	1.65	Medial Prefrontal Cortex	Prefrontal Cortex	1.9	787	227950	0.003	0.0019322	0.609756	NaN	NaN
898	AAV	CamKIIa	aIC	aIC 1294	1.65	Nucleus Accumbens, core	Striatum	1.9	12156	771187	0.016	0.0298447	3.25203	NaN	NaN
899	AAV	CamKIIa	aIC	aIC 1294	1.65	Olfactory Tubercle	Striatum	1.9	15929	699422	0.023	0.0391079	4.6748	NaN	NaN
900	AAV	CamKIIa	aIC	aIC 1294	1.65	Orbitofrontal Cortex	Prefrontal Cortex	1.9	3294	299980	0.011	0.00808724	2.23577	NaN	NaN
901	AAV	CamKIIa	aIC	aIC 1294	1.65	Somatosensory Cortex, primary	Sensory Cortex	1.9	769042	1.59765e+06	0.481	1.88811	97.7642	NaN	NaN
902	AAV	CamKIIa	aIC	aIC 1294	1.65	Motor Cortex, secondary	Motor Cortex	1.9	339714	1.37461e+06	0.247	0.834046	50.2033	NaN	NaN
903	AAV	CamKIIa	aIC	aIC 1294	1.65	Orbitofrontal Cortex	Prefrontal Cortex	1.9	481	271129	0.002	0.00118092	0.406504	NaN	NaN
904	AAV	CamKIIa	aIC	aIC 1294	1.65	Caudate Putamen	Striatum	1.9	1966	170120	0.012	0.00482681	2.43902	NaN	NaN
905	AAV	CamKIIa	aIC	aIC 1294	1.65	Motor Cortex, primary	Motor Cortex	2.1	977433	1.98685e+06	0.492	2.39974	100	NaN	NaN
906	AAV	CamKIIa	aIC	aIC 1294	1.65	Orbitofrontal Cortex	Prefrontal Cortex	2.1	264034	1.02678e+06	0.257	0.648241	52.2358	NaN	NaN
907	AAV	CamKIIa	aIC	aIC 1294	1.65	Orbitofrontal Cortex	Prefrontal Cortex	2.1	26601	684983	0.039	0.0653092	7.92683	NaN	NaN
908	AAV	CamKIIa	aIC	aIC 1294	1.65	Medial Prefrontal Cortex	Prefrontal Cortex	2.1	21428	457793	0.047	0.0526088	9.55285	NaN	NaN
909	AAV	CamKIIa	aIC	aIC 1294	1.65	Orbitofrontal Cortex	Prefrontal Cortex	2.1	1198	484194	0.002	0.00294126	0.406504	NaN	NaN
910	AAV	CamKIIa	aIC	aIC 1294	1.65	Piriform Area	Piriform Cortex	2.1	30448	2.33967e+06	0.013	0.0747542	2.64228	NaN	NaN
911	AAV	CamKIIa	aIC	aIC 1294	1.65	Anterior Olfactory Nucleus	Olfactory areas	2.1	54646	1.06358e+06	0.051	0.134164	10.3659	NaN	NaN
912	AAV	CamKIIa	aIC	aIC 1294	1.65	Tenia Tecta	Olfactory areas	2.1	7663	1.10929e+06	0.007	0.0188137	1.42276	NaN	NaN
913	AAV	CamKIIa	aIC	aIC 1294	1.65	Endopiriform Nucleus	Olfactory areas	2.1	8446	601467	0.014	0.0207361	2.84553	NaN	NaN
914	AAV	CamKIIa	aIC	aIC 1294	1.65	Motor Cortex, secondary	Motor Cortex	2.1	640146	1.69616e+06	0.377	1.57165	76.626	NaN	NaN
915	AAV	CamKIIa	aIC	aIC 1294	1.65	Motor Cortex, primary	Motor Cortex	2.2	432680	957268	0.452	1.06229	91.8699	NaN	NaN
916	AAV	CamKIIa	aIC	aIC 1294	1.65	Agranular Insular Cortex	Insular Cortex	2.2	439324	972434	0.452	1.0786	91.8699	NaN	NaN
917	AAV	CamKIIa	aIC	aIC 1294	1.65	Orbitofrontal Cortex	Prefrontal Cortex	2.2	52912	663554	0.08	0.129906	16.2602	NaN	NaN
918	AAV	CamKIIa	aIC	aIC 1294	1.65	Orbitofrontal Cortex	Prefrontal Cortex	2.2	5837	517479	0.011	0.0143307	2.23577	NaN	NaN
919	AAV	CamKIIa	aIC	aIC 1294	1.65	Medial Prefrontal Cortex	Prefrontal Cortex	2.2	33720	610663	0.055	0.0827874	11.1789	NaN	NaN
920	AAV	CamKIIa	aIC	aIC 1294	1.65	Orbitofrontal Cortex	Prefrontal Cortex	2.2	396	754565	0.0005248	0.000972236	0.106667	NaN	NaN
921	AAV	CamKIIa	aIC	aIC 1294	1.65	Piriform Area	Piriform Cortex	2.2	1716	2.00046e+06	0.0008578	0.00421302	0.17435	NaN	NaN
922	AAV	CamKIIa	aIC	aIC 1294	1.65	Anterior Olfactory Nucleus	Olfactory areas	2.2	7795	898617	0.009	0.0191378	1.82927	NaN	NaN
923	AAV	CamKIIa	aIC	aIC 1294	1.65	Tenia Tecta	Olfactory areas	2.2	131	816344	0.0001605	0.000321624	0.032622	NaN	NaN
924	AAV	CamKIIa	aIC	aIC 1294	1.65	Endopiriform Nucleus	Olfactory areas	2.2	1241	783761	0.002	0.00304683	0.406504	NaN	NaN
925	AAV	CamKIIa	aIC	aIC 1294	1.65	Motor Cortex, secondary	Motor Cortex	2.2	437204	1.26881e+06	0.345	1.0734	70.122	NaN	NaN
926	AAV	CamKIIa	aIC	aIC 1294	1.65	Anterior Olfactory Nucleus	Olfactory areas	2.3	5363	871293	0.006	0.0131669	1.21951	NaN	NaN
927	AAV	CamKIIa	aIC	aIC 1294	1.65	Endopiriform Nucleus	Olfactory areas	2.3	222	584423	0.0003799	0.000545041	0.0772154	NaN	NaN
928	AAV	CamKIIa	aIC	aIC 1294	1.65	Orbitofrontal Cortex	Prefrontal Cortex	2.3	549	570617	0.0009621	0.00134787	0.195549	NaN	NaN
929	AAV	CamKIIa	aIC	aIC 1294	1.65	Cingulate Cortex	Prefrontal Cortex	2.3	56898	308418	0.184	0.139693	37.3984	NaN	NaN
930	AAV	CamKIIa	aIC	aIC 1294	1.65	Medial Prefrontal Cortex	Prefrontal Cortex	2.3	10162	359080	0.028	0.0249491	5.69106	NaN	NaN
931	AAV	CamKIIa	aIC	aIC 1294	1.65	Orbitofrontal Cortex	Prefrontal Cortex	2.3	3551	528002	0.007	0.00871821	1.42276	NaN	NaN
932	AAV	CamKIIa	aIC	aIC 1294	1.65	Orbitofrontal Cortex	Prefrontal Cortex	2.3	57031	815834	0.07	0.140019	14.2276	NaN	NaN
933	AAV	CamKIIa	aIC	aIC 1294	1.65	Agranular Insular Cortex	Insular Cortex	2.3	251213	621365	0.404	0.616763	82.1138	NaN	NaN
934	AAV	CamKIIa	aIC	aIC 1294	1.65	Motor Cortex, secondary	Motor Cortex	2.3	418730	1.34433e+06	0.311	1.02804	63.2114	NaN	NaN
935	AAV	CamKIIa	aIC	aIC 1294	1.65	Motor Cortex, primary	Motor Cortex	2.3	202467	460286	0.44	0.497085	89.4309	NaN	NaN
936	AAV	CamKIIa	aIC	aIC 1294	1.65	Tenia Tecta	Olfactory areas	2.3	1258	900351	0.001	0.00308857	0.203252	NaN	NaN
937	AAV	CamKIIa	aIC	aIC 1294	1.65	Piriform Area	Piriform Cortex	2.3	2508	1.89727e+06	0.001	0.0061575	0.203252	NaN	NaN
938	AAV	CamKIIa	aIC	aIC 1294	1.65	Main Olfactory Bulb	Olfactory areas	2.4	775	733042	0.001	0.00190273	0.203252	NaN	NaN
939	AAV	CamKIIa	aIC	aIC 1294	1.65	Piriform Area	Piriform Cortex	2.4	423	948005	0.0004462	0.00103852	0.0906911	NaN	NaN
940	AAV	CamKIIa	aIC	aIC 1294	1.65	Anterior Olfactory Nucleus	Olfactory areas	2.4	4420	2.0965e+06	0.002	0.0108517	0.406504	NaN	NaN
941	AAV	CamKIIa	aIC	aIC 1294	1.65	Motor Cortex, secondary	Motor Cortex	2.4	646597	1.93476e+06	0.334	1.58749	67.8862	NaN	NaN
942	AAV	CamKIIa	aIC	aIC 1294	1.65	Orbitofrontal Cortex	Prefrontal Cortex	2.4	130443	481237	0.271	0.320256	55.0813	NaN	NaN
943	AAV	CamKIIa	aIC	aIC 1294	1.65	Orbitofrontal Cortex	Prefrontal Cortex	2.4	1670	402825	0.004	0.00410009	0.813008	NaN	NaN
944	AAV	CamKIIa	aIC	aIC 1294	1.65	Orbitofrontal Cortex	Prefrontal Cortex	2.4	13663	381663	0.036	0.0335446	7.31707	NaN	NaN
945	AAV	CamKIIa	aIC	aIC 1294	1.65	Orbitofrontal Cortex	Prefrontal Cortex	2.4	1014	449107	0.002	0.00248951	0.406504	NaN	NaN
946	AAV	CamKIIa	aIC	aIC 1294	1.65	Medial Prefrontal Cortex	Prefrontal Cortex	2.4	52226	491098	0.106	0.128222	21.5447	NaN	NaN
947	AAV	CamKIIa	aIC	aIC 1294	1.65	Main Olfactory Bulb	Olfactory areas	2.5	1257	791897	0.002	0.00308611	0.406504	NaN	NaN
948	AAV	CamKIIa	aIC	aIC 1294	1.65	Tenia Tecta	Olfactory areas	2.5	949	93264.6	0.01	0.00232993	2.03252	NaN	NaN
949	AAV	CamKIIa	aIC	aIC 1294	1.65	Piriform Area	Piriform Cortex	2.5	628	999741	0.0006282	0.00154183	0.127683	NaN	NaN
950	AAV	CamKIIa	aIC	aIC 1294	1.65	Anterior Olfactory Nucleus	Olfactory areas	2.5	1995	1.78009e+06	0.001	0.00489801	0.203252	NaN	NaN
951	AAV	CamKIIa	aIC	aIC 1294	1.65	Frontal Association Cortex	Prefrontal Cortex	2.5	545579	1.81129e+06	0.301	1.33947	61.1789	NaN	NaN
952	AAV	CamKIIa	aIC	aIC 1294	1.65	Orbitofrontal Cortex	Prefrontal Cortex	2.5	113910	436688	0.261	0.279665	53.0488	NaN	NaN
953	AAV	CamKIIa	aIC	aIC 1294	1.65	Orbitofrontal Cortex	Prefrontal Cortex	2.5	568	334950	0.002	0.00139452	0.406504	NaN	NaN
954	AAV	CamKIIa	aIC	aIC 1294	1.65	Orbitofrontal Cortex	Prefrontal Cortex	2.5	5838	382028	0.015	0.0143331	3.04878	NaN	NaN
955	AAV	CamKIIa	aIC	aIC 1294	1.65	Orbitofrontal Cortex	Prefrontal Cortex	2.5	162	285921	0.0005666	0.000397733	0.115163	NaN	NaN
956	AAV	CamKIIa	aIC	aIC 1294	1.65	Medial Prefrontal Cortex	Prefrontal Cortex	2.5	25210	402776	0.063	0.0618941	12.8049	NaN	NaN
957	AAV	CamKIIa	aIC	aIC 1294	1.65	Central Nucleus of Amygdala	Amygdala	-0.6	2491	57679	0.043	0.00611576	8.73984	NaN	NaN
958	AAV	CamKIIa	aIC	aIC 1294	1.65	Central Nucleus of Amygdala	Amygdala	-0.7	29	69321.4	0.0004183	7.11991e-05	0.0850203	NaN	NaN
959	AAV	CamKIIa	aIC	aIC 1294	1.65	Central Nucleus of Amygdala	Amygdala	-0.7	301	69462.5	0.004	0.000738998	0.813008	NaN	NaN
960	AAV	CamKIIa	aIC	aIC 1294	1.65	Central Nucleus of Amygdala	Amygdala	-0.8	515	64713.4	0.008	0.0012644	1.62602	NaN	NaN
961	AAV	CamKIIa	aIC	aIC 1294	1.65	Central Nucleus of Amygdala	Amygdala	-0.8	2163	45501.5	0.048	0.00531047	9.7561	NaN	NaN
962	AAV	CamKIIa	aIC	aIC 1294	1.65	Central Nucleus of Amygdala	Amygdala	-0.8	1387	81994.8	0.017	0.00340528	3.45528	NaN	NaN
963	AAV	CamKIIa	aIC	aIC 1294	1.65	Central Nucleus of Amygdala	Amygdala	-0.9	815	52261.5	0.016	0.00200094	3.25203	NaN	NaN
964	AAV	CamKIIa	aIC	aIC 1294	1.65	Central Nucleus of Amygdala	Amygdala	-0.9	8147	70330.8	0.116	0.020002	23.5772	NaN	NaN
965	AAV	CamKIIa	aIC	aIC 1294	1.65	Central Nucleus of Amygdala	Amygdala	-0.9	651	75303.4	0.009	0.0015983	1.82927	NaN	NaN
966	AAV	CamKIIa	aIC	aIC 1294	1.65	Central Nucleus of Amygdala	Amygdala	-1.1	358	65199.5	0.005	0.000878941	1.01626	NaN	NaN
967	AAV	CamKIIa	aIC	aIC 1294	1.65	Central Nucleus of Amygdala	Amygdala	-1.1	5492	78221.8	0.07	0.0134836	14.2276	NaN	NaN
968	AAV	CamKIIa	aIC	aIC 1294	1.65	Central Nucleus of Amygdala	Amygdala	-1.1	987	130417	0.008	0.00242322	1.62602	NaN	NaN
969	AAV	CamKIIa	aIC	aIC 1294	1.65	Central Nucleus of Amygdala	Amygdala	-1.2	1472	58294.4	0.025	0.00361397	5.0813	NaN	NaN
970	AAV	CamKIIa	aIC	aIC 1294	1.65	Central Nucleus of Amygdala	Amygdala	-1.2	799	102479	0.008	0.00196166	1.62602	NaN	NaN
971	AAV	CamKIIa	aIC	aIC 1294	1.65	Central Nucleus of Amygdala	Amygdala	-1.2	210	78000.3	0.003	0.00051558	0.609756	NaN	NaN
972	AAV	CamKIIa	aIC	aIC 1294	1.65	Central Nucleus of Amygdala	Amygdala	-1.4	402	79339	0.005	0.000986967	1.01626	NaN	NaN
973	AAV	CamKIIa	aIC	aIC 1294	1.65	Central Nucleus of Amygdala	Amygdala	-1.4	117	79243	0.001	0.000287252	0.203252	NaN	NaN
974	AAV	CamKIIa	aIC	aIC 1294	1.65	Central Nucleus of Amygdala	Amygdala	-1.4	64	97039.8	0.0006595	0.000157129	0.134045	NaN	NaN
975	AAV	CamKIIa	aIC	aIC 1294	1.65	Central Nucleus of Amygdala	Amygdala	-1.8	362	89329.1	0.004	0.000888761	0.813008	NaN	NaN
976	AAV	CamKIIa	aIC	aIC 1294	1.65	Central Nucleus of Amygdala	Amygdala	-1.8	263	83507.9	0.003	0.000645702	0.609756	NaN	NaN
977	AAV	CamKIIa	aIC	aIC 1294	1.65	Central Nucleus of Amygdala	Amygdala	-1.8	33	121744	0.0002711	8.10197e-05	0.0551016	NaN	NaN
978	AAV	CamKIIa	aIC	aIC 1294	1.65	Central Nucleus of Amygdala	Amygdala	-1.9	0	86348	0	0	0	NaN	NaN
979	AAV	CamKIIa	aIC	aIC 558	1.95	Agranular Insular Cortex, posterior	Insular Cortex	-0.1	2884	353792	0.002	0.0120024	1.86916	NaN	NaN
980	AAV	CamKIIa	aIC	aIC 558	1.95	Motor Cortex, secondary	Motor Cortex	-0.1	488	456057	0.0002675	0.00203091	0.25	NaN	NaN
981	AAV	CamKIIa	aIC	aIC 558	1.95	Dysgranular Insular Cortex	Insular Cortex	-0.1	27192	327403	0.021	0.113165	19.6262	NaN	NaN
982	AAV	CamKIIa	aIC	aIC 558	1.95	Granular Insular Cortex	Insular Cortex	-0.1	38112	420292	0.023	0.158611	21.4953	NaN	NaN
983	AAV	CamKIIa	aIC	aIC 558	1.95	Somatosensory Cortex, secondary	Sensory Cortex	-0.1	27736	1.17825e+06	0.006	0.115429	5.60748	NaN	NaN
984	AAV	CamKIIa	aIC	aIC 558	1.95	Somatosensory Cortex, primary	Sensory Cortex	-0.1	27540	3.59734e+06	0.002	0.114613	1.86916	NaN	NaN
985	AAV	CamKIIa	aIC	aIC 558	1.95	Piriform Area	Piriform Cortex	-0.1	580	1.20726e+06	0.0001201	0.00241379	0.112243	NaN	NaN
986	AAV	CamKIIa	aIC	aIC 558	1.95	Endopiriform Nucleus	Olfactory areas	-0.1	724	279033	0.0006487	0.00301307	0.606262	NaN	NaN
987	AAV	CamKIIa	aIC	aIC 558	1.95	Medial Prefrontal Cortex	Prefrontal Cortex	-0.1	28	281554	2.49e-05	0.000116528	0.023271	NaN	NaN
988	AAV	CamKIIa	aIC	aIC 558	1.95	Cingulate Cortex	Prefrontal Cortex	-0.1	208	487048	0.0001068	0.000865634	0.0998131	NaN	NaN
989	AAV	CamKIIa	aIC	aIC 558	1.95	Claustrum	Claustrum	-0.1	6896	122844	0.014	0.0286991	13.0841	NaN	NaN
990	AAV	CamKIIa	aIC	aIC 558	1.95	Hypothalamic Lateral Zone	Hypothalamus	-0.1	52	539909	2.41e-05	0.000216409	0.0225234	NaN	NaN
991	AAV	CamKIIa	aIC	aIC 558	1.95	Motor Cortex, primary	Motor Cortex	-0.1	624	525041	0.0002971	0.0025969	0.277664	NaN	NaN
992	AAV	CamKIIa	aIC	aIC 558	1.95	Bed Nuclei of the Stria Terminalis (BNST)	Pallidum	-0.1	116	625584	4.64e-05	0.000482758	0.0433645	NaN	NaN
993	AAV	CamKIIa	aIC	aIC 558	1.95	Globus Pallidus	Pallidum	-0.1	13856	588800	0.006	0.0576646	5.60748	NaN	NaN
994	AAV	CamKIIa	aIC	aIC 558	1.95	Fundus of Striatum (IPAC)	Striatum	-0.1	1864	280078	0.002	0.00775741	1.86916	NaN	NaN
995	AAV	CamKIIa	aIC	aIC 558	1.95	Ventral Pallidum	Pallidum	-0.1	276	628709	0.0001097	0.00114863	0.102523	NaN	NaN
996	AAV	CamKIIa	aIC	aIC 558	1.95	Basal Forebrain	Basal Forebrain	-0.1	8	261865	7.64e-06	3.32936e-05	0.00714019	NaN	NaN
997	AAV	CamKIIa	aIC	aIC 558	1.95	Caudate Putamen	Striatum	-0.1	538256	4.76415e+06	0.028	2.24006	26.1682	NaN	NaN
998	AAV	CamKIIa	aIC	aIC 558	1.95	Agranular Insular Cortex, posterior	Insular Cortex	-0.2	500	344726	0.0003626	0.00208085	0.338879	NaN	NaN
999	AAV	CamKIIa	aIC	aIC 558	1.95	Motor Cortex, secondary	Motor Cortex	-0.2	416	623311	0.0001669	0.00173127	0.155981	NaN	NaN
1000	AAV	CamKIIa	aIC	aIC 558	1.95	Dysgranular Insular Cortex	Insular Cortex	-0.2	8608	295211	0.007	0.0358239	6.54206	NaN	NaN
1001	AAV	CamKIIa	aIC	aIC 558	1.95	Granular Insular Cortex	Insular Cortex	-0.2	30096	335460	0.022	0.125251	20.5607	NaN	NaN
1002	AAV	CamKIIa	aIC	aIC 558	1.95	Somatosensory Cortex, secondary	Sensory Cortex	-0.2	46320	1.32319e+06	0.009	0.19277	8.41121	NaN	NaN
1003	AAV	CamKIIa	aIC	aIC 558	1.95	Somatosensory Cortex, primary	Sensory Cortex	-0.2	15512	3.86468e+06	0.001	0.0645563	0.934579	NaN	NaN
1004	AAV	CamKIIa	aIC	aIC 558	1.95	Piriform Area	Piriform Cortex	-0.2	56	1.23985e+06	1.13e-05	0.000233055	0.0105607	NaN	NaN
1005	AAV	CamKIIa	aIC	aIC 558	1.95	Medial Prefrontal Cortex	Prefrontal Cortex	-0.2	4	261920	3.82e-06	1.66468e-05	0.00357009	NaN	NaN
1006	AAV	CamKIIa	aIC	aIC 558	1.95	Cingulate Cortex	Prefrontal Cortex	-0.2	116	423628	6.85e-05	0.000482758	0.0640187	NaN	NaN
1007	AAV	CamKIIa	aIC	aIC 558	1.95	Claustrum	Claustrum	-0.2	2244	121056	0.005	0.00933886	4.6729	NaN	NaN
1008	AAV	CamKIIa	aIC	aIC 558	1.95	Motor Cortex, primary	Motor Cortex	-0.2	1224	664375	0.0004606	0.00509392	0.430467	NaN	NaN
1009	AAV	CamKIIa	aIC	aIC 558	1.95	Bed Nuclei of the Stria Terminalis (BNST)	Pallidum	-0.2	68	970319	1.75e-05	0.000282996	0.0163551	NaN	NaN
1010	AAV	CamKIIa	aIC	aIC 558	1.95	Fundus of Striatum (IPAC)	Striatum	-0.2	4192	361519	0.003	0.0174459	2.80374	NaN	NaN
1011	AAV	CamKIIa	aIC	aIC 558	1.95	Caudate Putamen	Striatum	-0.2	483644	5.0059e+06	0.024	2.01278	22.4299	NaN	NaN
1012	AAV	CamKIIa	aIC	aIC 558	1.95	Globus Pallidus	Pallidum	-0.2	1748	720526	0.0006065	0.00727466	0.566822	NaN	NaN
1013	AAV	CamKIIa	aIC	aIC 558	1.95	Ventral Pallidum	Pallidum	-0.2	132	426139	7.74e-05	0.000549345	0.0723364	NaN	NaN
1014	AAV	CamKIIa	aIC	aIC 558	1.95	Endopiriform Nucleus	Olfactory areas	-0.2	452	321665	0.0003513	0.00188109	0.328318	NaN	NaN
1015	AAV	CamKIIa	aIC	aIC 558	1.95	Piriform-Amygdalar Area	Olfactory areas	-0.2	24	498084	1.21e-05	9.98809e-05	0.0113084	NaN	NaN
1016	AAV	CamKIIa	aIC	aIC 558	1.95	Cortical Amygdala	Amygdala	-0.2	40	229656	4.35e-05	0.000166468	0.0406542	NaN	NaN
1017	AAV	CamKIIa	aIC	aIC 558	1.95	Nucleus of the Lateral Olfactory Tract	Olfactory areas	-0.2	40	93493.8	0.000107	0.000166468	0.1	NaN	NaN
1018	AAV	CamKIIa	aIC	aIC 558	1.95	Basal Forebrain	Basal Forebrain	-0.2	0	201608	0	0	0	NaN	NaN
1019	AAV	CamKIIa	aIC	aIC 558	1.95	Anterior Amygdaloid Area	Amygdala	-0.2	24	410392	1.46e-05	9.98809e-05	0.0136449	NaN	NaN
1020	AAV	CamKIIa	aIC	aIC 558	1.95	Agranular Insular Cortex, posterior	Insular Cortex	-0.3	1588	344726	0.001	0.00660878	0.934579	NaN	NaN
1021	AAV	CamKIIa	aIC	aIC 558	1.95	Motor Cortex, secondary	Motor Cortex	-0.3	5308	623311	0.002	0.0220903	1.86916	NaN	NaN
1022	AAV	CamKIIa	aIC	aIC 558	1.95	Dysgranular Insular Cortex	Insular Cortex	-0.3	9900	295211	0.008	0.0412009	7.47664	NaN	NaN
1023	AAV	CamKIIa	aIC	aIC 558	1.95	Granular Insular Cortex	Insular Cortex	-0.3	58372	335460	0.044	0.242927	41.1215	NaN	NaN
1024	AAV	CamKIIa	aIC	aIC 558	1.95	Somatosensory Cortex, secondary	Sensory Cortex	-0.3	96224	1.32319e+06	0.018	0.400456	16.8224	NaN	NaN
1025	AAV	CamKIIa	aIC	aIC 558	1.95	Somatosensory Cortex, primary	Sensory Cortex	-0.3	37124	3.86468e+06	0.002	0.154499	1.86916	NaN	NaN
1026	AAV	CamKIIa	aIC	aIC 558	1.95	Piriform Area	Piriform Cortex	-0.3	168	1.48071e+06	2.84e-05	0.000699166	0.0265421	NaN	NaN
1027	AAV	CamKIIa	aIC	aIC 558	1.95	Medial Prefrontal Cortex	Prefrontal Cortex	-0.3	208	261920	0.0001985	0.000865634	0.185514	NaN	NaN
1028	AAV	CamKIIa	aIC	aIC 558	1.95	Cingulate Cortex	Prefrontal Cortex	-0.3	660	423628	0.0003895	0.00274672	0.364019	NaN	NaN
1029	AAV	CamKIIa	aIC	aIC 558	1.95	Claustrum	Claustrum	-0.3	2420	121056	0.005	0.0100713	4.6729	NaN	NaN
1030	AAV	CamKIIa	aIC	aIC 558	1.95	Motor Cortex, primary	Motor Cortex	-0.3	2020	664375	0.0007601	0.00840664	0.710374	NaN	NaN
1031	AAV	CamKIIa	aIC	aIC 558	1.95	Bed Nuclei of the Stria Terminalis (BNST)	Pallidum	-0.3	72	426744	4.22e-05	0.000299643	0.0394393	NaN	NaN
1032	AAV	CamKIIa	aIC	aIC 558	1.95	Fundus of Striatum (IPAC)	Striatum	-0.3	20760	215650	0.024	0.086397	22.4299	NaN	NaN
1033	AAV	CamKIIa	aIC	aIC 558	1.95	Globus Pallidus	Pallidum	-0.3	79112	989449	0.02	0.329241	18.6916	NaN	NaN
1034	AAV	CamKIIa	aIC	aIC 558	1.95	Endopiriform Nucleus	Olfactory areas	-0.3	572	269913	0.0005298	0.00238049	0.49514	NaN	NaN
1035	AAV	CamKIIa	aIC	aIC 558	1.95	Piriform-Amygdalar Area	Olfactory areas	-0.3	84	510944	4.11e-05	0.000349583	0.0384112	NaN	NaN
1036	AAV	CamKIIa	aIC	aIC 558	1.95	Cortical Amygdala	Amygdala	-0.3	184	217905	0.0002111	0.000765753	0.19729	NaN	NaN
1037	AAV	CamKIIa	aIC	aIC 558	1.95	Nucleus of the Lateral Olfactory Tract	Olfactory areas	-0.3	44	126125	8.72e-05	0.000183115	0.0814953	NaN	NaN
1038	AAV	CamKIIa	aIC	aIC 558	1.95	Basal Forebrain	Basal Forebrain	-0.3	404	189013	0.0005344	0.00168133	0.499439	NaN	NaN
1039	AAV	CamKIIa	aIC	aIC 558	1.95	Anterior Amygdaloid Area	Amygdala	-0.3	2344	539716	0.001	0.00975503	0.934579	NaN	NaN
1040	AAV	CamKIIa	aIC	aIC 558	1.95	Caudate Putamen	Striatum	-0.3	671336	4.76446e+06	0.035	2.7939	32.7103	NaN	NaN
1041	AAV	CamKIIa	aIC	aIC 558	1.95	Ventral Pallidum	Pallidum	-0.3	3180	192671	0.004	0.0132342	3.73832	NaN	NaN
1042	AAV	CamKIIa	aIC	aIC 558	1.95	Extended Amygdala	Amygdala	-0.3	184	444600	0.0001035	0.000765753	0.096729	NaN	NaN
1043	AAV	CamKIIa	aIC	aIC 558	1.95	Hypothalamic Lateral Zone	Hypothalamus	-0.3	64	920364	1.74e-05	0.000266349	0.0162617	NaN	NaN
1044	AAV	CamKIIa	aIC	aIC 558	1.95	Hypothalamic Medial Zone	Hypothalamus	-0.3	8	166410	1.2e-05	3.32936e-05	0.011215	NaN	NaN
1045	AAV	CamKIIa	aIC	aIC 558	1.95	Anterodorsal Thalamic Nucleus	Thalamus	-0.3	136	142917	0.0002379	0.000565992	0.222336	NaN	NaN
1046	AAV	CamKIIa	aIC	aIC 558	1.95	Agranular Insular Cortex, posterior	Insular Cortex	-0.4	77960	643064	0.03	0.324446	28.0374	NaN	NaN
1047	AAV	CamKIIa	aIC	aIC 558	1.95	Motor Cortex, secondary	Motor Cortex	-0.4	500	538589	0.0002321	0.00208085	0.216916	NaN	NaN
1048	AAV	CamKIIa	aIC	aIC 558	1.95	Dysgranular Insular Cortex	Insular Cortex	-0.4	51968	344167	0.038	0.216275	35.514	NaN	NaN
1049	AAV	CamKIIa	aIC	aIC 558	1.95	Granular Insular Cortex	Insular Cortex	-0.4	18592	363279	0.013	0.0773744	12.1495	NaN	NaN
1050	AAV	CamKIIa	aIC	aIC 558	1.95	Somatosensory Cortex, secondary	Sensory Cortex	-0.4	35232	1.36919e+06	0.006	0.146625	5.60748	NaN	NaN
1051	AAV	CamKIIa	aIC	aIC 558	1.95	Somatosensory Cortex, primary	Sensory Cortex	-0.4	16352	4.08754e+06	0.001	0.0680522	0.934579	NaN	NaN
1052	AAV	CamKIIa	aIC	aIC 558	1.95	Piriform Area	Piriform Cortex	-0.4	320	1.14474e+06	6.99e-05	0.00133175	0.0653271	NaN	NaN
1053	AAV	CamKIIa	aIC	aIC 558	1.95	Medial Prefrontal Cortex	Prefrontal Cortex	-0.4	80	251608	7.95e-05	0.000332936	0.0742991	NaN	NaN
1054	AAV	CamKIIa	aIC	aIC 558	1.95	Cingulate Cortex	Prefrontal Cortex	-0.4	164	366358	0.0001119	0.000682519	0.104579	NaN	NaN
1055	AAV	CamKIIa	aIC	aIC 558	1.95	Claustrum	Claustrum	-0.4	9312	110414	0.021	0.0387538	19.6262	NaN	NaN
1056	AAV	CamKIIa	aIC	aIC 558	1.95	Motor Cortex, primary	Motor Cortex	-0.4	1780	616968	0.0007213	0.00740783	0.674112	NaN	NaN
1057	AAV	CamKIIa	aIC	aIC 558	1.95	Fundus of Striatum (IPAC)	Striatum	-0.4	25996	235036	0.028	0.108188	26.1682	NaN	NaN
1058	AAV	CamKIIa	aIC	aIC 558	1.95	Globus Pallidus	Pallidum	-0.4	139840	1.12412e+06	0.031	0.581973	28.972	NaN	NaN
1059	AAV	CamKIIa	aIC	aIC 558	1.95	Endopiriform Nucleus	Olfactory areas	-0.4	2224	310931	0.002	0.00925563	1.86916	NaN	NaN
1060	AAV	CamKIIa	aIC	aIC 558	1.95	Piriform-Amygdalar Area	Olfactory areas	-0.4	88	461860	4.76e-05	0.00036623	0.044486	NaN	NaN
1061	AAV	CamKIIa	aIC	aIC 558	1.95	Cortical Amygdala	Amygdala	-0.4	72	269629	6.68e-05	0.000299643	0.0624299	NaN	NaN
1062	AAV	CamKIIa	aIC	aIC 558	1.95	Nucleus of the Lateral Olfactory Tract	Olfactory areas	-0.4	112	289428	9.67e-05	0.000466111	0.0903738	NaN	NaN
1063	AAV	CamKIIa	aIC	aIC 558	1.95	Ventral Pallidum	Pallidum	-0.4	3868	322389	0.003	0.0160975	2.80374	NaN	NaN
1064	AAV	CamKIIa	aIC	aIC 558	1.95	Extended Amygdala	Amygdala	-0.4	252	433463	0.0001453	0.00104875	0.135794	NaN	NaN
1065	AAV	CamKIIa	aIC	aIC 558	1.95	Hypothalamic Medial Zone	Hypothalamus	-0.4	20	270344	1.85e-05	8.32341e-05	0.0172897	NaN	NaN
1066	AAV	CamKIIa	aIC	aIC 558	1.95	Anterior Amygdaloid Area	Amygdala	-0.4	3268	597563	0.001	0.0136004	0.934579	NaN	NaN
1067	AAV	CamKIIa	aIC	aIC 558	1.95	Caudate Putamen	Striatum	-0.4	464180	3.71158e+06	0.031	1.93178	28.972	NaN	NaN
1068	AAV	CamKIIa	aIC	aIC 558	1.95	Basal Forebrain	Basal Forebrain	-0.4	116	158830	0.0001826	0.000482758	0.170654	NaN	NaN
1069	AAV	CamKIIa	aIC	aIC 558	1.95	Intralaminar Nuclei of the Dorsal Thalamus	Thalamus	-0.4	32	390419	2.05e-05	0.000133175	0.0191589	NaN	NaN
1070	AAV	CamKIIa	aIC	aIC 558	1.95	Hypothalamic Lateral Zone	Hypothalamus	-0.4	32	565519	1.42e-05	0.000133175	0.013271	NaN	NaN
1071	AAV	CamKIIa	aIC	aIC 558	1.95	Anterodorsal Thalamic Nucleus	Thalamus	-0.4	100	68928.8	0.0003627	0.00041617	0.338972	NaN	NaN
1072	AAV	CamKIIa	aIC	aIC 558	1.95	Anterodorsal Thalamic Nucleus	Thalamus	-0.4	96	297384	8.07e-05	0.000399524	0.0754206	NaN	NaN
1073	AAV	CamKIIa	aIC	aIC 558	1.95	Anterodorsal Thalamic Nucleus	Thalamus	-0.4	68	363040	4.68e-05	0.000282996	0.0437383	NaN	NaN
1074	AAV	CamKIIa	aIC	aIC 558	1.95	Bed Nuclei of the Stria Terminalis (BNST)	Pallidum	-0.4	12	284295	1.06e-05	4.99404e-05	0.00990654	NaN	NaN
1075	AAV	CamKIIa	aIC	aIC 558	1.95	Hypothalamic Medial Zone	Hypothalamus	-0.4	32	471108	1.7e-05	0.000133175	0.0158879	NaN	NaN
1076	AAV	CamKIIa	aIC	aIC 558	1.95	Intralaminar Nuclei of the Dorsal Thalamus	Thalamus	-0.4	32	170287	4.7e-05	0.000133175	0.0439252	NaN	NaN
1077	AAV	CamKIIa	aIC	aIC 558	1.95	Paraventricular Thalamic Nucleus	Thalamus	-0.4	128	393187	8.14e-05	0.000532698	0.0760748	NaN	NaN
1078	AAV	CamKIIa	aIC	aIC 558	1.95	Granular Insular Cortex	Insular Cortex	-0.5	19392	381272	0.013	0.0807037	12.1495	NaN	NaN
1079	AAV	CamKIIa	aIC	aIC 558	1.95	Somatosensory Cortex, secondary	Sensory Cortex	-0.5	13292	1.48806e+06	0.002	0.0553174	1.86916	NaN	NaN
1080	AAV	CamKIIa	aIC	aIC 558	1.95	Somatosensory Cortex, primary	Sensory Cortex	-0.5	32	3.99402e+06	2e-06	0.000133175	0.00186916	NaN	NaN
1081	AAV	CamKIIa	aIC	aIC 558	1.95	Piriform Area	Piriform Cortex	-0.5	72	1.10414e+06	1.63e-05	0.000299643	0.0152336	NaN	NaN
1082	AAV	CamKIIa	aIC	aIC 558	1.95	Fundus of Striatum (IPAC)	Striatum	-0.5	9552	185145	0.013	0.0397526	12.1495	NaN	NaN
1083	AAV	CamKIIa	aIC	aIC 558	1.95	Globus Pallidus	Pallidum	-0.5	68548	1.08737e+06	0.016	0.285276	14.9533	NaN	NaN
1084	AAV	CamKIIa	aIC	aIC 558	1.95	Piriform-Amygdalar Area	Olfactory areas	-0.5	48	252131	4.76e-05	0.000199762	0.044486	NaN	NaN
1085	AAV	CamKIIa	aIC	aIC 558	1.95	Cortical Amygdala	Amygdala	-0.5	64	224514	7.13e-05	0.000266349	0.0666355	NaN	NaN
1086	AAV	CamKIIa	aIC	aIC 558	1.95	Nucleus of the Lateral Olfactory Tract	Olfactory areas	-0.5	76	267695	7.1e-05	0.000316289	0.0663551	NaN	NaN
1087	AAV	CamKIIa	aIC	aIC 558	1.95	Caudate Putamen	Striatum	-0.5	140360	3.07601e+06	0.011	0.584137	10.2804	NaN	NaN
1088	AAV	CamKIIa	aIC	aIC 558	1.95	Intralaminar Nuclei of the Dorsal Thalamus	Thalamus	-0.5	248	717776	8.64e-05	0.0010321	0.0807477	NaN	NaN
1089	AAV	CamKIIa	aIC	aIC 558	1.95	Hypothalamic Lateral Zone	Hypothalamus	-0.5	12	931483	3.22e-06	4.99404e-05	0.00300935	NaN	NaN
1090	AAV	CamKIIa	aIC	aIC 558	1.95	Basolateral Nucleus	Amygdala	-0.5	4388	112348	0.01	0.0182616	9.34579	NaN	NaN
1091	AAV	CamKIIa	aIC	aIC 558	1.95	Endopiriform Nucleus	Olfactory areas	-0.5	160	258345	0.0001548	0.000665873	0.144673	NaN	NaN
1092	AAV	CamKIIa	aIC	aIC 558	1.95	Basomedial Nucleus	Amygdala	-0.5	44	92577.2	0.0001188	0.000183115	0.111028	NaN	NaN
1093	AAV	CamKIIa	aIC	aIC 558	1.95	Anterior Amygdaloid Area	Amygdala	-0.5	204	260958	0.0001954	0.000848987	0.182617	NaN	NaN
1094	AAV	CamKIIa	aIC	aIC 558	1.95	Basal Forebrain	Basal Forebrain	-0.5	104	56068.8	0.0004637	0.000432817	0.433364	NaN	NaN
1095	AAV	CamKIIa	aIC	aIC 558	1.95	Central Nucleus of Amygdala	Amygdala	-0.5	12	55830.5	5.37e-05	4.99404e-05	0.0501869	NaN	NaN
1096	AAV	CamKIIa	aIC	aIC 558	1.95	Extended Amygdala	Amygdala	-0.5	1140	892729	0.0003192	0.00474434	0.298318	NaN	NaN
1097	AAV	CamKIIa	aIC	aIC 558	1.95	Anterodorsal Thalamic Nucleus	Thalamus	-0.5	40	296495	3.37e-05	0.000166468	0.0314953	NaN	NaN
1098	AAV	CamKIIa	aIC	aIC 558	1.95	Granular Insular Cortex	Insular Cortex	-0.7	69184	413591	0.042	0.287923	39.2523	NaN	NaN
1099	AAV	CamKIIa	aIC	aIC 558	1.95	Somatosensory Cortex, secondary	Sensory Cortex	-0.7	60824	1.47933e+06	0.01	0.253131	9.34579	NaN	NaN
1100	AAV	CamKIIa	aIC	aIC 558	1.95	Somatosensory Cortex, primary	Sensory Cortex	-0.7	25268	4.14184e+06	0.002	0.105158	1.86916	NaN	NaN
1101	AAV	CamKIIa	aIC	aIC 558	1.95	Fundus of Striatum (IPAC)	Striatum	-0.7	12548	117142	0.027	0.0522211	25.2336	NaN	NaN
1102	AAV	CamKIIa	aIC	aIC 558	1.95	Globus Pallidus	Pallidum	-0.7	104656	1.07193e+06	0.024	0.435547	22.4299	NaN	NaN
1103	AAV	CamKIIa	aIC	aIC 558	1.95	Piriform-Amygdalar Area	Olfactory areas	-0.7	236	487680	0.000121	0.000982162	0.113084	NaN	NaN
1104	AAV	CamKIIa	aIC	aIC 558	1.95	Cortical Amygdala	Amygdala	-0.7	60	349474	4.29e-05	0.000249702	0.0400935	NaN	NaN
1105	AAV	CamKIIa	aIC	aIC 558	1.95	Nucleus of the Lateral Olfactory Tract	Olfactory areas	-0.7	8	243240	8.22e-06	3.32936e-05	0.00768224	NaN	NaN
1106	AAV	CamKIIa	aIC	aIC 558	1.95	Caudate Putamen	Striatum	-0.7	422356	3.04947e+06	0.035	1.75772	32.7103	NaN	NaN
1107	AAV	CamKIIa	aIC	aIC 558	1.95	Intralaminar Nuclei of the Dorsal Thalamus	Thalamus	-0.7	19580	833855	0.006	0.0814861	5.60748	NaN	NaN
1108	AAV	CamKIIa	aIC	aIC 558	1.95	Hypothalamic Lateral Zone	Hypothalamus	-0.7	548	1.40274e+06	9.77e-05	0.00228061	0.0913084	NaN	NaN
1109	AAV	CamKIIa	aIC	aIC 558	1.95	Basolateral Nucleus	Amygdala	-0.7	52468	179609	0.073	0.218356	68.2243	NaN	NaN
1110	AAV	CamKIIa	aIC	aIC 558	1.95	Basomedial Nucleus	Amygdala	-0.7	156	179114	0.0002177	0.000649226	0.203458	NaN	NaN
1111	AAV	CamKIIa	aIC	aIC 558	1.95	Anterodorsal Thalamic Nucleus	Thalamus	-0.7	180	679737	6.62e-05	0.000749107	0.0618692	NaN	NaN
1112	AAV	CamKIIa	aIC	aIC 558	1.95	Central Nucleus of Amygdala	Amygdala	-0.7	2072	187556	0.003	0.00862305	2.80374	NaN	NaN
1113	AAV	CamKIIa	aIC	aIC 558	1.95	Medial Amygdala	Amygdala	-0.7	16	155099	2.58e-05	6.65873e-05	0.0241121	NaN	NaN
1114	AAV	CamKIIa	aIC	aIC 558	1.95	Anterior Amygdaloid Area	Amygdala	-0.7	88	194009	0.0001134	0.00036623	0.105981	NaN	NaN
1115	AAV	CamKIIa	aIC	aIC 558	1.95	Extended Amygdala	Amygdala	-0.7	11128	518222	0.005	0.0463114	4.6729	NaN	NaN
1116	AAV	CamKIIa	aIC	aIC 558	1.95	Intralaminar Nuclei of the Dorsal Thalamus	Thalamus	-0.7	64	235375	6.8e-05	0.000266349	0.0635514	NaN	NaN
1117	AAV	CamKIIa	aIC	aIC 558	1.95	Intralaminar Nuclei of the Dorsal Thalamus	Thalamus	-0.7	48	83374.5	0.0001439	0.000199762	0.134486	NaN	NaN
1118	AAV	CamKIIa	aIC	aIC 558	1.95	Intralaminar Nuclei of the Dorsal Thalamus	Thalamus	-0.7	68	129764	0.000131	0.000282996	0.12243	NaN	NaN
1119	AAV	CamKIIa	aIC	aIC 558	1.95	Paraventricular Thalamic Nucleus	Thalamus	-0.7	16	355157	1.13e-05	6.65873e-05	0.0105607	NaN	NaN
1120	AAV	CamKIIa	aIC	aIC 558	1.95	Mediodorsal Thalamic Nuclei	Thalamus	-0.7	8	59331.9	3.37e-05	3.32936e-05	0.0314953	NaN	NaN
1121	AAV	CamKIIa	aIC	aIC 558	1.95	Intralaminar Nuclei of the Dorsal Thalamus	Thalamus	-0.7	12	420832	7.13e-06	4.99404e-05	0.00666355	NaN	NaN
1122	AAV	CamKIIa	aIC	aIC 558	1.95	Intralaminar Nuclei of the Dorsal Thalamus	Thalamus	-0.7	4	26819.9	3.73e-05	1.66468e-05	0.0348598	NaN	NaN
1123	AAV	CamKIIa	aIC	aIC 558	1.95	Endopiriform Nucleus	Olfactory areas	-0.7	1352	232112	0.001	0.00562662	0.934579	NaN	NaN
1124	AAV	CamKIIa	aIC	aIC 558	1.95	Piriform Area	Piriform Cortex	-0.7	496	1.40868e+06	8.8e-05	0.0020642	0.082243	NaN	NaN
1125	AAV	CamKIIa	aIC	aIC 558	1.95	Claustrum	Claustrum	-0.7	604	81633	0.002	0.00251367	1.86916	NaN	NaN
1126	AAV	CamKIIa	aIC	aIC 558	1.95	Agranular Insular Cortex, posterior	Insular Cortex	-0.7	54980	443674	0.031	0.22881	28.972	NaN	NaN
1127	AAV	CamKIIa	aIC	aIC 558	1.95	Dysgranular Insular Cortex	Insular Cortex	-0.7	86616	341445	0.063	0.36047	58.8785	NaN	NaN
1128	AAV	CamKIIa	aIC	aIC 558	1.95	Motor Cortex, primary	Motor Cortex	-0.7	1548	566820	0.0006828	0.00644232	0.638131	NaN	NaN
1129	AAV	CamKIIa	aIC	aIC 558	1.95	Motor Cortex, secondary	Motor Cortex	-0.7	468	763102	0.0001533	0.00194768	0.143271	NaN	NaN
1130	AAV	CamKIIa	aIC	aIC 558	1.95	Cingulate Cortex	Prefrontal Cortex	-0.7	304	470567	0.0001615	0.00126516	0.150935	NaN	NaN
1131	AAV	CamKIIa	aIC	aIC 558	1.95	Medial Prefrontal Cortex	Prefrontal Cortex	-0.7	56	223844	6.25e-05	0.000233055	0.0584112	NaN	NaN
1132	AAV	CamKIIa	aIC	aIC 558	1.95	Granular Insular Cortex	Insular Cortex	-0.9	3876	385891	0.003	0.0161308	2.80374	NaN	NaN
1133	AAV	CamKIIa	aIC	aIC 558	1.95	Somatosensory Cortex, secondary	Sensory Cortex	-0.9	1680	1.3504e+06	0.000311	0.00699166	0.290654	NaN	NaN
1134	AAV	CamKIIa	aIC	aIC 558	1.95	Somatosensory Cortex, primary	Sensory Cortex	-0.9	68	4.2564e+06	3.99e-06	0.000282996	0.00372897	NaN	NaN
1135	AAV	CamKIIa	aIC	aIC 558	1.95	Globus Pallidus	Pallidum	-0.9	47932	955287	0.013	0.199479	12.1495	NaN	NaN
1136	AAV	CamKIIa	aIC	aIC 558	1.95	Caudate Putamen	Striatum	-0.9	122684	2.69326e+06	0.011	0.510574	10.2804	NaN	NaN
1137	AAV	CamKIIa	aIC	aIC 558	1.95	Basolateral Nucleus	Amygdala	-0.9	23812	199279	0.03	0.0990985	28.0374	NaN	NaN
1138	AAV	CamKIIa	aIC	aIC 558	1.95	Basomedial Nucleus	Amygdala	-0.9	20	158619	3.15e-05	8.32341e-05	0.0294393	NaN	NaN
1139	AAV	CamKIIa	aIC	aIC 558	1.95	Central Nucleus of Amygdala	Amygdala	-0.9	2212	303543	0.002	0.00920569	1.86916	NaN	NaN
1140	AAV	CamKIIa	aIC	aIC 558	1.95	Mediodorsal Thalamic Nuclei	Thalamus	-0.9	20	134127	3.73e-05	8.32341e-05	0.0348598	NaN	NaN
1141	AAV	CamKIIa	aIC	aIC 558	1.95	Endopiriform Nucleus	Olfactory areas	-0.9	28	226200	3.1e-05	0.000116528	0.028972	NaN	NaN
1142	AAV	CamKIIa	aIC	aIC 558	1.95	Piriform Area	Piriform Cortex	-0.9	264	1.46459e+06	4.51e-05	0.00109869	0.0421495	NaN	NaN
1143	AAV	CamKIIa	aIC	aIC 558	1.95	Claustrum	Claustrum	-0.9	188	81633	0.0005757	0.0007824	0.538037	NaN	NaN
1144	AAV	CamKIIa	aIC	aIC 558	1.95	Agranular Insular Cortex, posterior	Insular Cortex	-0.9	38472	428678	0.022	0.160109	20.5607	NaN	NaN
1145	AAV	CamKIIa	aIC	aIC 558	1.95	Dysgranular Insular Cortex	Insular Cortex	-0.9	25572	295486	0.022	0.106423	20.5607	NaN	NaN
1146	AAV	CamKIIa	aIC	aIC 558	1.95	Motor Cortex, primary	Motor Cortex	-0.9	0	308401	0	0	0	NaN	NaN
1147	AAV	CamKIIa	aIC	aIC 558	1.95	Motor Cortex, secondary	Motor Cortex	-0.9	4	333681	3e-06	1.66468e-05	0.00280374	NaN	NaN
1148	AAV	CamKIIa	aIC	aIC 558	1.95	Retrosplenial Cortex	Association Cortex	-0.9	0	679563	0	0	0	NaN	NaN
1149	AAV	CamKIIa	aIC	aIC 558	1.95	Retrosplenial Cortex	Association Cortex	-0.9	36	386102	2.33e-05	0.000149821	0.0217757	NaN	NaN
1150	AAV	CamKIIa	aIC	aIC 558	1.95	Lateral Amygdala	Amygdala	-0.9	10880	118343	0.023	0.0452793	21.4953	NaN	NaN
1151	AAV	CamKIIa	aIC	aIC 558	1.95	Extended Amygdala	Amygdala	-0.9	288	148481	0.0004849	0.00119857	0.453178	NaN	NaN
1152	AAV	CamKIIa	aIC	aIC 558	1.95	Medial Amygdala	Amygdala	-0.9	12	250179	1.2e-05	4.99404e-05	0.011215	NaN	NaN
1153	AAV	CamKIIa	aIC	aIC 558	1.95	Piriform-Amygdalar Area	Olfactory areas	-0.9	8	230490	8.68e-06	3.32936e-05	0.00811215	NaN	NaN
1154	AAV	CamKIIa	aIC	aIC 558	1.95	Cortical Amygdala	Amygdala	-0.9	16	329997	1.21e-05	6.65873e-05	0.0113084	NaN	NaN
1155	AAV	CamKIIa	aIC	aIC 558	1.95	Anterior Amygdaloid Area	Amygdala	-0.9	256	538039	0.000119	0.0010654	0.111215	NaN	NaN
1156	AAV	CamKIIa	aIC	aIC 558	1.95	Intralaminar Nuclei of the Dorsal Thalamus	Thalamus	-0.9	12	104456	2.87e-05	4.99404e-05	0.0268224	NaN	NaN
1157	AAV	CamKIIa	aIC	aIC 558	1.95	Paraventricular Thalamic Nucleus	Thalamus	-0.9	28	212644	3.29e-05	0.000116528	0.0307477	NaN	NaN
1158	AAV	CamKIIa	aIC	aIC 558	1.95	Intralaminar Nuclei of the Dorsal Thalamus	Thalamus	-0.9	25064	438010	0.014	0.104309	13.0841	NaN	NaN
1159	AAV	CamKIIa	aIC	aIC 558	1.95	Ventral Group of the Dorsal Thalamus	Thalamus	-0.9	3484	285083	0.003	0.0144994	2.80374	NaN	NaN
1160	AAV	CamKIIa	aIC	aIC 558	1.95	Ventral Pallidum	Pallidum	-0.9	120	89259.1	0.0003361	0.000499404	0.314112	NaN	NaN
1161	AAV	CamKIIa	aIC	aIC 558	1.95	Intralaminar Nuclei of the Dorsal Thalamus	Thalamus	-0.9	1992	371326	0.001	0.00829011	0.934579	NaN	NaN
1162	AAV	CamKIIa	aIC	aIC 558	1.95	Ventral Group of the Dorsal Thalamus	Thalamus	-0.9	0	386515	0	0	0	NaN	NaN
1163	AAV	CamKIIa	aIC	aIC 558	1.95	Anterodorsal Thalamic Nucleus	Thalamus	-0.9	40	305899	3.27e-05	0.000166468	0.0305607	NaN	NaN
1164	AAV	CamKIIa	aIC	aIC 558	1.95	Intralaminar Nuclei of the Dorsal Thalamus	Thalamus	-0.9	148	148894	0.0002485	0.000615932	0.232243	NaN	NaN
1165	AAV	CamKIIa	aIC	aIC 558	1.95	Intralaminar Nuclei of the Dorsal Thalamus	Thalamus	-0.9	44	60166	0.0001828	0.000183115	0.170841	NaN	NaN
1166	AAV	CamKIIa	aIC	aIC 558	1.95	Mediodorsal Thalamic Nuclei	Thalamus	-0.9	108	55903.8	0.000483	0.000449464	0.451402	NaN	NaN
1167	AAV	CamKIIa	aIC	aIC 558	1.95	Hypothalamic Lateral Zone	Hypothalamus	-0.9	944	1.14606e+06	0.0002059	0.00392865	0.19243	NaN	NaN
1168	AAV	CamKIIa	aIC	aIC 558	1.95	Granular Insular Cortex	Insular Cortex	-1	57324	318077	0.045	0.238565	42.0561	NaN	NaN
1169	AAV	CamKIIa	aIC	aIC 558	1.95	Somatosensory Cortex, secondary	Sensory Cortex	-1	41972	1.303e+06	0.008	0.174675	7.47664	NaN	NaN
1170	AAV	CamKIIa	aIC	aIC 558	1.95	Globus Pallidus	Pallidum	-1	5080	597134	0.002	0.0211415	1.86916	NaN	NaN
1171	AAV	CamKIIa	aIC	aIC 558	1.95	Basolateral Nucleus	Amygdala	-1	20316	260812	0.019	0.0845492	17.757	NaN	NaN
1172	AAV	CamKIIa	aIC	aIC 558	1.95	Basomedial Nucleus	Amygdala	-1	120	293827	0.0001021	0.000499404	0.0954206	NaN	NaN
1173	AAV	CamKIIa	aIC	aIC 558	1.95	Endopiriform Nucleus	Olfactory areas	-1	104	196331	0.0001324	0.000432817	0.123738	NaN	NaN
1174	AAV	CamKIIa	aIC	aIC 558	1.95	Piriform Area	Piriform Cortex	-1	112	1.39628e+06	2.01e-05	0.000466111	0.018785	NaN	NaN
1175	AAV	CamKIIa	aIC	aIC 558	1.95	Claustrum	Claustrum	-1	84	83899.5	0.0002503	0.000349583	0.233925	NaN	NaN
1176	AAV	CamKIIa	aIC	aIC 558	1.95	Agranular Insular Cortex, posterior	Insular Cortex	-1	2316	354164	0.002	0.0096385	1.86916	NaN	NaN
1177	AAV	CamKIIa	aIC	aIC 558	1.95	Dysgranular Insular Cortex	Insular Cortex	-1	26212	229612	0.029	0.109087	27.1028	NaN	NaN
1178	AAV	CamKIIa	aIC	aIC 558	1.95	Motor Cortex, primary	Motor Cortex	-1	240	252313	0.0002378	0.000998809	0.222243	NaN	NaN
1179	AAV	CamKIIa	aIC	aIC 558	1.95	Retrosplenial Cortex	Association Cortex	-1	132	592467	5.57e-05	0.000549345	0.0520561	NaN	NaN
1180	AAV	CamKIIa	aIC	aIC 558	1.95	Retrosplenial Cortex	Association Cortex	-1	56	334213	4.19e-05	0.000233055	0.0391589	NaN	NaN
1181	AAV	CamKIIa	aIC	aIC 558	1.95	Lateral Amygdala	Amygdala	-1	15116	233958	0.016	0.0629083	14.9533	NaN	NaN
1182	AAV	CamKIIa	aIC	aIC 558	1.95	Medial Amygdala	Amygdala	-1	28	297274	2.36e-05	0.000116528	0.0220561	NaN	NaN
1183	AAV	CamKIIa	aIC	aIC 558	1.95	Piriform-Amygdalar Area	Olfactory areas	-1	44	199072	5.53e-05	0.000183115	0.0516822	NaN	NaN
1184	AAV	CamKIIa	aIC	aIC 558	1.95	Cortical Amygdala	Amygdala	-1	40	332957	3e-05	0.000166468	0.0280374	NaN	NaN
1185	AAV	CamKIIa	aIC	aIC 558	1.95	Intralaminar Nuclei of the Dorsal Thalamus	Thalamus	-1	52	140752	9.24e-05	0.000216409	0.0863551	NaN	NaN
1186	AAV	CamKIIa	aIC	aIC 558	1.95	Paraventricular Thalamic Nucleus	Thalamus	-1	24	208378	2.88e-05	9.98809e-05	0.0269159	NaN	NaN
1187	AAV	CamKIIa	aIC	aIC 558	1.95	Intralaminar Nuclei of the Dorsal Thalamus	Thalamus	-1	30112	457308	0.016	0.125317	14.9533	NaN	NaN
1188	AAV	CamKIIa	aIC	aIC 558	1.95	Ventral Group of the Dorsal Thalamus	Thalamus	-1	10908	409559	0.007	0.0453959	6.54206	NaN	NaN
1189	AAV	CamKIIa	aIC	aIC 558	1.95	Ventral Pallidum	Pallidum	-1	136	123855	0.0002745	0.000565992	0.256542	NaN	NaN
1190	AAV	CamKIIa	aIC	aIC 558	1.95	Ventral Group of the Dorsal Thalamus	Thalamus	-1	3604	771672	0.001	0.0149988	0.934579	NaN	NaN
1191	AAV	CamKIIa	aIC	aIC 558	1.95	Anterodorsal Thalamic Nucleus	Thalamus	-1	220	252019	0.0002182	0.000915575	0.203925	NaN	NaN
1192	AAV	CamKIIa	aIC	aIC 558	1.95	Intralaminar Nuclei of the Dorsal Thalamus	Thalamus	-1	32	83853.6	9.54e-05	0.000133175	0.0891589	NaN	NaN
1193	AAV	CamKIIa	aIC	aIC 558	1.95	Mediodorsal Thalamic Nuclei	Thalamus	-1	108	63151.5	0.0004275	0.000449464	0.399533	NaN	NaN
1194	AAV	CamKIIa	aIC	aIC 558	1.95	Hypothalamic Lateral Zone	Hypothalamus	-1	3200	1.68242e+06	0.0004755	0.0133175	0.444393	NaN	NaN
1195	AAV	CamKIIa	aIC	aIC 558	1.95	Motor Cortex, secondary	Motor Cortex	-1	164	271218	0.0001512	0.000682519	0.141308	NaN	NaN
1196	AAV	CamKIIa	aIC	aIC 558	1.95	Somatosensory Cortex, primary	Sensory Cortex	-1	21064	5.09929e+06	0.001	0.0876621	0.934579	NaN	NaN
1197	AAV	CamKIIa	aIC	aIC 558	1.95	Central Nucleus of Amygdala	Amygdala	-1	3084	406487	0.002	0.0128347	1.86916	NaN	NaN
1198	AAV	CamKIIa	aIC	aIC 558	1.95	Basolateral Nucleus	Amygdala	-1	60	39735.6	0.0003775	0.000249702	0.352804	NaN	NaN
1199	AAV	CamKIIa	aIC	aIC 558	1.95	Extended Amygdala	Amygdala	-1	152	289490	0.0001313	0.000632579	0.12271	NaN	NaN
1200	AAV	CamKIIa	aIC	aIC 558	1.95	Caudate Putamen	Striatum	-1	136752	2.30974e+06	0.015	0.569121	14.0187	NaN	NaN
1201	AAV	CamKIIa	aIC	aIC 558	1.95	Hypothalamic Lateral Zone	Hypothalamus	-1	656	96047.5	0.002	0.00273008	1.86916	NaN	NaN
1202	AAV	CamKIIa	aIC	aIC 558	1.95	Intralaminar Nuclei of the Dorsal Thalamus	Thalamus	-1	36	368228	2.44e-05	0.000149821	0.0228037	NaN	NaN
1203	AAV	CamKIIa	aIC	aIC 558	1.95	Intralaminar Nuclei of the Dorsal Thalamus	Thalamus	-1	76	105995	0.0001793	0.000316289	0.16757	NaN	NaN
1204	AAV	CamKIIa	aIC	aIC 558	1.95	Mediodorsal Thalamic Nuclei	Thalamus	-1	252	280368	0.0002247	0.00104875	0.21	NaN	NaN
1205	AAV	CamKIIa	aIC	aIC 558	1.95	Anterodorsal Thalamic Nucleus	Thalamus	-1	44	619303	1.78e-05	0.000183115	0.0166355	NaN	NaN
1206	AAV	CamKIIa	aIC	aIC 558	1.95	Hypothalamic Medial Zone	Hypothalamus	-1	4	74419.4	1.34e-05	1.66468e-05	0.0125234	NaN	NaN
1207	AAV	CamKIIa	aIC	aIC 558	1.95	Habenular Nuclei	Hypothalamus	-1	4	60492.7	1.65e-05	1.66468e-05	0.0154206	NaN	NaN
1208	AAV	CamKIIa	aIC	aIC 558	1.95	Granular Insular Cortex	Insular Cortex	-1.2	11708	311564	0.009	0.0487252	8.41121	NaN	NaN
1209	AAV	CamKIIa	aIC	aIC 558	1.95	Somatosensory Cortex, secondary	Sensory Cortex	-1.2	15796	928779	0.004	0.0657383	3.73832	NaN	NaN
1210	AAV	CamKIIa	aIC	aIC 558	1.95	Globus Pallidus	Pallidum	-1.2	724	497286	0.000364	0.00301307	0.340187	NaN	NaN
1211	AAV	CamKIIa	aIC	aIC 558	1.95	Basolateral Nucleus	Amygdala	-1.2	5644	300354	0.005	0.0234887	4.6729	NaN	NaN
1212	AAV	CamKIIa	aIC	aIC 558	1.95	Basomedial Nucleus	Amygdala	-1.2	120	304295	9.86e-05	0.000499404	0.0921495	NaN	NaN
1213	AAV	CamKIIa	aIC	aIC 558	1.95	Endopiriform Nucleus	Olfactory areas	-1.2	120	263341	0.0001139	0.000499404	0.106449	NaN	NaN
1214	AAV	CamKIIa	aIC	aIC 558	1.95	Piriform Area	Piriform Cortex	-1.2	196	1.03491e+06	4.74e-05	0.000815694	0.0442991	NaN	NaN
1215	AAV	CamKIIa	aIC	aIC 558	1.95	Agranular Insular Cortex, posterior	Insular Cortex	-1.2	11616	380667	0.008	0.0483423	7.47664	NaN	NaN
1216	AAV	CamKIIa	aIC	aIC 558	1.95	Dysgranular Insular Cortex	Insular Cortex	-1.2	24180	276375	0.022	0.10063	20.5607	NaN	NaN
1217	AAV	CamKIIa	aIC	aIC 558	1.95	Motor Cortex, primary	Motor Cortex	-1.2	548	252250	0.0005431	0.00228061	0.50757	NaN	NaN
1218	AAV	CamKIIa	aIC	aIC 558	1.95	Retrosplenial Cortex	Association Cortex	-1.2	512	428037	0.000299	0.00213079	0.279439	NaN	NaN
1219	AAV	CamKIIa	aIC	aIC 558	1.95	Retrosplenial Cortex	Association Cortex	-1.2	1140	528442	0.0005393	0.00474434	0.504019	NaN	NaN
1220	AAV	CamKIIa	aIC	aIC 558	1.95	Lateral Amygdala	Amygdala	-1.2	1504	173028	0.002	0.0062592	1.86916	NaN	NaN
1221	AAV	CamKIIa	aIC	aIC 558	1.95	Medial Amygdala	Amygdala	-1.2	24	295541	2.03e-05	9.98809e-05	0.018972	NaN	NaN
1222	AAV	CamKIIa	aIC	aIC 558	1.95	Piriform-Amygdalar Area	Olfactory areas	-1.2	104	202103	0.0001286	0.000432817	0.120187	NaN	NaN
1223	AAV	CamKIIa	aIC	aIC 558	1.95	Cortical Amygdala	Amygdala	-1.2	32	248648	3.22e-05	0.000133175	0.0300935	NaN	NaN
1224	AAV	CamKIIa	aIC	aIC 558	1.95	Ventral Group of the Dorsal Thalamus	Thalamus	-1.2	23916	453876	0.013	0.0995313	12.1495	NaN	NaN
1225	AAV	CamKIIa	aIC	aIC 558	1.95	Mediodorsal Thalamic Nuclei	Thalamus	-1.2	448	117931	0.0009497	0.00186444	0.88757	NaN	NaN
1226	AAV	CamKIIa	aIC	aIC 558	1.95	Hypothalamic Lateral Zone	Hypothalamus	-1.2	1068	1.4807e+06	0.0001803	0.0044447	0.168505	NaN	NaN
1227	AAV	CamKIIa	aIC	aIC 558	1.95	Motor Cortex, secondary	Motor Cortex	-1.2	188	252653	0.000186	0.0007824	0.173832	NaN	NaN
1228	AAV	CamKIIa	aIC	aIC 558	1.95	Somatosensory Cortex, primary	Sensory Cortex	-1.2	25472	4.63573e+06	0.001	0.106007	0.934579	NaN	NaN
1229	AAV	CamKIIa	aIC	aIC 558	1.95	Basolateral Nucleus	Amygdala	-1.2	108	40963.1	0.0006591	0.000449464	0.615981	NaN	NaN
1230	AAV	CamKIIa	aIC	aIC 558	1.95	Hypothalamic Lateral Zone	Hypothalamus	-1.2	7712	219032	0.009	0.0320951	8.41121	NaN	NaN
1231	AAV	CamKIIa	aIC	aIC 558	1.95	Mediodorsal Thalamic Nuclei	Thalamus	-1.2	544	326816	0.0004161	0.00226397	0.388879	NaN	NaN
1232	AAV	CamKIIa	aIC	aIC 558	1.95	Hypothalamic Medial Zone	Hypothalamus	-1.2	16	74400.9	5.38e-05	6.65873e-05	0.0502804	NaN	NaN
1233	AAV	CamKIIa	aIC	aIC 558	1.95	Habenular Nuclei	Hypothalamus	-1.2	4	64446.6	1.55e-05	1.66468e-05	0.014486	NaN	NaN
1234	AAV	CamKIIa	aIC	aIC 558	1.95	Central Nucleus of Amygdala	Amygdala	-1.2	792	176813	0.001	0.00329607	0.934579	NaN	NaN
1235	AAV	CamKIIa	aIC	aIC 558	1.95	Caudate Putamen	Striatum	-1.2	38424	1.67545e+06	0.006	0.159909	5.60748	NaN	NaN
1236	AAV	CamKIIa	aIC	aIC 558	1.95	Cortical Amygdala	Amygdala	-1.2	24	102871	5.83e-05	9.98809e-05	0.054486	NaN	NaN
1237	AAV	CamKIIa	aIC	aIC 558	1.95	Hypothalamic Medial Zone	Hypothalamus	-1.2	64	162029	9.88e-05	0.000266349	0.0923364	NaN	NaN
1238	AAV	CamKIIa	aIC	aIC 558	1.95	Hypothalamic Medial Zone	Hypothalamus	-1.2	20	262443	1.91e-05	8.32341e-05	0.0178505	NaN	NaN
1239	AAV	CamKIIa	aIC	aIC 558	1.95	Intralaminar Nuclei of the Dorsal Thalamus	Thalamus	-1.2	12672	429027	0.007	0.0527371	6.54206	NaN	NaN
1240	AAV	CamKIIa	aIC	aIC 558	1.95	Ventral Pallidum	Pallidum	-1.2	2164	703175	0.0007694	0.00900593	0.719065	NaN	NaN
1241	AAV	CamKIIa	aIC	aIC 558	1.95	Anterodorsal Thalamic Nucleus	Thalamus	-1.2	48	559927	2.14e-05	0.000199762	0.02	NaN	NaN
1242	AAV	CamKIIa	aIC	aIC 558	1.95	Ventral Group of the Dorsal Thalamus	Thalamus	-1.2	8660	627481	0.003	0.0360403	2.80374	NaN	NaN
1243	AAV	CamKIIa	aIC	aIC 558	1.95	Intralaminar Nuclei of the Dorsal Thalamus	Thalamus	-1.2	472	308805	0.0003821	0.00196432	0.357103	NaN	NaN
1244	AAV	CamKIIa	aIC	aIC 558	1.95	Intralaminar Nuclei of the Dorsal Thalamus	Thalamus	-1.2	368	92806.4	0.0009913	0.00153151	0.926449	NaN	NaN
1245	AAV	CamKIIa	aIC	aIC 558	1.95	Intralaminar Nuclei of the Dorsal Thalamus	Thalamus	-1.2	228	47892.7	0.001	0.000948868	0.934579	NaN	NaN
1246	AAV	CamKIIa	aIC	aIC 558	1.95	Intralaminar Nuclei of the Dorsal Thalamus	Thalamus	-1.2	352	154338	0.0005702	0.00146492	0.532897	NaN	NaN
1247	AAV	CamKIIa	aIC	aIC 558	1.95	Paraventricular Thalamic Nucleus	Thalamus	-1.2	72	148573	0.0001212	0.000299643	0.113271	NaN	NaN
1248	AAV	CamKIIa	aIC	aIC 558	1.95	Intralaminar Nuclei of the Dorsal Thalamus	Thalamus	-1.2	88	78727.3	0.0002794	0.00036623	0.261121	NaN	NaN
1249	AAV	CamKIIa	aIC	aIC 558	1.95	Intralaminar Nuclei of the Dorsal Thalamus	Thalamus	-1.2	40	94318.8	0.000106	0.000166468	0.0990654	NaN	NaN
1250	AAV	CamKIIa	aIC	aIC 558	1.95	Retrosplenial Cortex	Association Cortex	-1.3	316	401272	0.0001969	0.0013151	0.184019	NaN	NaN
1251	AAV	CamKIIa	aIC	aIC 558	1.95	Retrosplenial Cortex	Association Cortex	-1.3	796	523538	0.0003801	0.00331272	0.355234	NaN	NaN
1252	AAV	CamKIIa	aIC	aIC 558	1.95	Motor Cortex, secondary	Motor Cortex	-1.3	376	218510	0.0004302	0.0015648	0.402056	NaN	NaN
1253	AAV	CamKIIa	aIC	aIC 558	1.95	Motor Cortex, primary	Motor Cortex	-1.3	460	234560	0.0004903	0.00191438	0.458224	NaN	NaN
1254	AAV	CamKIIa	aIC	aIC 558	1.95	Somatosensory Cortex, primary	Sensory Cortex	-1.3	16940	3.79789e+06	0.001	0.0704993	0.934579	NaN	NaN
1255	AAV	CamKIIa	aIC	aIC 558	1.95	Somatosensory Cortex, secondary	Sensory Cortex	-1.3	5716	1.6022e+06	0.0008919	0.0237883	0.833551	NaN	NaN
1256	AAV	CamKIIa	aIC	aIC 558	1.95	Ectorhinal Cortex	Association Cortex	-1.3	20196	1.10429e+06	0.005	0.0840498	4.6729	NaN	NaN
1257	AAV	CamKIIa	aIC	aIC 558	1.95	Lateral Amygdala	Amygdala	-1.3	240	195035	0.0003076	0.000998809	0.287477	NaN	NaN
1258	AAV	CamKIIa	aIC	aIC 558	1.95	Basolateral Nucleus	Amygdala	-1.3	1820	410887	0.001	0.0075743	0.934579	NaN	NaN
1259	AAV	CamKIIa	aIC	aIC 558	1.95	Perirhinal Cortex	Association Cortex	-1.3	7712	470008	0.004	0.0320951	3.73832	NaN	NaN
1260	AAV	CamKIIa	aIC	aIC 558	1.95	Endopiriform Nucleus	Olfactory areas	-1.3	120	233340	0.0001286	0.000499404	0.120187	NaN	NaN
1261	AAV	CamKIIa	aIC	aIC 558	1.95	Basolateral Nucleus	Amygdala	-1.3	92	53236.5	0.000432	0.000382877	0.403738	NaN	NaN
1262	AAV	CamKIIa	aIC	aIC 558	1.95	Piriform Area	Piriform Cortex	-1.3	144	1.02551e+06	3.51e-05	0.000599285	0.0328037	NaN	NaN
1263	AAV	CamKIIa	aIC	aIC 558	1.95	Piriform-Amygdalar Area	Olfactory areas	-1.3	28	100488	6.97e-05	0.000116528	0.0651402	NaN	NaN
1264	AAV	CamKIIa	aIC	aIC 558	1.95	Medial Amygdala	Amygdala	-1.3	96	466928	5.14e-05	0.000399524	0.0480374	NaN	NaN
1265	AAV	CamKIIa	aIC	aIC 558	1.95	Cortical Amygdala	Amygdala	-1.3	36	171763	5.24e-05	0.000149821	0.048972	NaN	NaN
1266	AAV	CamKIIa	aIC	aIC 558	1.95	Cortical Amygdala	Amygdala	-1.3	28	169939	4.12e-05	0.000116528	0.0385047	NaN	NaN
1267	AAV	CamKIIa	aIC	aIC 558	1.95	Basomedial Nucleus	Amygdala	-1.3	128	516682	6.19e-05	0.000532698	0.0578505	NaN	NaN
1268	AAV	CamKIIa	aIC	aIC 558	1.95	Central Nucleus of Amygdala	Amygdala	-1.3	164	252571	0.0001623	0.000682519	0.151682	NaN	NaN
1269	AAV	CamKIIa	aIC	aIC 558	1.95	Central Nucleus of Amygdala	Amygdala	-1.3	260	289556	0.0002245	0.00108204	0.209813	NaN	NaN
1270	AAV	CamKIIa	aIC	aIC 558	1.95	Globus Pallidus	Pallidum	-1.3	100	463684	5.39e-05	0.00041617	0.0503738	NaN	NaN
1271	AAV	CamKIIa	aIC	aIC 558	1.95	Caudate Putamen	Striatum	-1.3	10396	1.5028e+06	0.002	0.0432651	1.86916	NaN	NaN
1272	AAV	CamKIIa	aIC	aIC 558	1.95	Intralaminar Nuclei of the Dorsal Thalamus	Thalamus	-1.3	3800	459651	0.002	0.0158145	1.86916	NaN	NaN
1273	AAV	CamKIIa	aIC	aIC 558	1.95	Ventral Pallidum	Pallidum	-1.3	1316	788199	0.0004174	0.0054768	0.390093	NaN	NaN
1274	AAV	CamKIIa	aIC	aIC 558	1.95	Ventral Group of the Dorsal Thalamus	Thalamus	-1.3	34544	704980	0.012	0.143762	11.215	NaN	NaN
1275	AAV	CamKIIa	aIC	aIC 558	1.95	Ventral Group of the Dorsal Thalamus	Thalamus	-1.3	25360	497745	0.013	0.105541	12.1495	NaN	NaN
1276	AAV	CamKIIa	aIC	aIC 558	1.95	Intralaminar Nuclei of the Dorsal Thalamus	Thalamus	-1.3	2720	203331	0.003	0.0113198	2.80374	NaN	NaN
1277	AAV	CamKIIa	aIC	aIC 558	1.95	Mediodorsal Thalamic Nuclei	Thalamus	-1.3	3712	485151	0.002	0.0154482	1.86916	NaN	NaN
1278	AAV	CamKIIa	aIC	aIC 558	1.95	Posterior Complex of the Thalamus	Thalamus	-1.3	212	358934	0.0001477	0.000882281	0.138037	NaN	NaN
1279	AAV	CamKIIa	aIC	aIC 558	1.95	Intralaminar Nuclei of the Dorsal Thalamus	Thalamus	-1.3	1196	80038.1	0.004	0.0049774	3.73832	NaN	NaN
1280	AAV	CamKIIa	aIC	aIC 558	1.95	Intralaminar Nuclei of the Dorsal Thalamus	Thalamus	-1.3	28	139682	5.01e-05	0.000116528	0.0468224	NaN	NaN
1281	AAV	CamKIIa	aIC	aIC 558	1.95	Anterodorsal Thalamic Nucleus	Thalamus	-1.3	20	426589	1.17e-05	8.32341e-05	0.0109346	NaN	NaN
1282	AAV	CamKIIa	aIC	aIC 558	1.95	Hypothalamic Medial Zone	Hypothalamus	-1.3	92	559350	4.11e-05	0.000382877	0.0384112	NaN	NaN
1283	AAV	CamKIIa	aIC	aIC 558	1.95	Hypothalamic Lateral Zone	Hypothalamus	-1.3	1720	884250	0.0004863	0.00715813	0.454486	NaN	NaN
1284	AAV	CamKIIa	aIC	aIC 558	1.95	Hypothalamic Lateral Zone	Hypothalamus	-1.3	60	244468	6.14e-05	0.000249702	0.0573832	NaN	NaN
1285	AAV	CamKIIa	aIC	aIC 558	1.95	Hypothalamic Lateral Zone	Hypothalamus	-1.3	32	91046.5	8.79e-05	0.000133175	0.0821495	NaN	NaN
1286	AAV	CamKIIa	aIC	aIC 558	1.95	Mediodorsal Thalamic Nuclei	Thalamus	-1.3	324	229097	0.0003536	0.00134839	0.330467	NaN	NaN
1287	AAV	CamKIIa	aIC	aIC 558	1.95	Intralaminar Nuclei of the Dorsal Thalamus	Thalamus	-1.3	48	170480	7.04e-05	0.000199762	0.0657944	NaN	NaN
1288	AAV	CamKIIa	aIC	aIC 558	1.95	Retrosplenial Cortex	Association Cortex	-1.4	232	466195	0.0001244	0.000965515	0.116262	NaN	NaN
1289	AAV	CamKIIa	aIC	aIC 558	1.95	Retrosplenial Cortex	Association Cortex	-1.4	296	485132	0.0001525	0.00123186	0.142523	NaN	NaN
1290	AAV	CamKIIa	aIC	aIC 558	1.95	Somatosensory Cortex, primary	Sensory Cortex	-1.4	18468	3.85681e+06	0.001	0.0768583	0.934579	NaN	NaN
1291	AAV	CamKIIa	aIC	aIC 558	1.95	Somatosensory Cortex, secondary	Sensory Cortex	-1.4	1684	1.39591e+06	0.0003016	0.00700831	0.281869	NaN	NaN
1292	AAV	CamKIIa	aIC	aIC 558	1.95	Ectorhinal Cortex	Association Cortex	-1.4	3028	769885	0.0009833	0.0126016	0.918972	NaN	NaN
1293	AAV	CamKIIa	aIC	aIC 558	1.95	Lateral Amygdala	Amygdala	-1.4	184	203166	0.0002264	0.000765753	0.211589	NaN	NaN
1294	AAV	CamKIIa	aIC	aIC 558	1.95	Basolateral Nucleus	Amygdala	-1.4	312	357999	0.0002179	0.00129845	0.203645	NaN	NaN
1295	AAV	CamKIIa	aIC	aIC 558	1.95	Perirhinal Cortex	Association Cortex	-1.4	5716	624181	0.002	0.0237883	1.86916	NaN	NaN
1296	AAV	CamKIIa	aIC	aIC 558	1.95	Endopiriform Nucleus	Olfactory areas	-1.4	64	248684	6.43e-05	0.000266349	0.0600935	NaN	NaN
1297	AAV	CamKIIa	aIC	aIC 558	1.95	Basolateral Nucleus	Amygdala	-1.4	124	62915.9	0.0004927	0.000516051	0.460467	NaN	NaN
1298	AAV	CamKIIa	aIC	aIC 558	1.95	Piriform Area	Piriform Cortex	-1.4	236	1.02926e+06	5.73e-05	0.000982162	0.0535514	NaN	NaN
1299	AAV	CamKIIa	aIC	aIC 558	1.95	Medial Amygdala	Amygdala	-1.4	52	365680	3.56e-05	0.000216409	0.033271	NaN	NaN
1300	AAV	CamKIIa	aIC	aIC 558	1.95	Cortical Amygdala	Amygdala	-1.4	120	226283	0.0001326	0.000499404	0.123925	NaN	NaN
1301	AAV	CamKIIa	aIC	aIC 558	1.95	Cortical Amygdala	Amygdala	-1.4	0	89653.3	0	0	0	NaN	NaN
1302	AAV	CamKIIa	aIC	aIC 558	1.95	Ventral Pallidum	Pallidum	-1.4	216	650369	8.3e-05	0.000898928	0.0775701	NaN	NaN
1303	AAV	CamKIIa	aIC	aIC 558	1.95	Ventral Group of the Dorsal Thalamus	Thalamus	-1.4	17544	594951	0.007	0.0730129	6.54206	NaN	NaN
1304	AAV	CamKIIa	aIC	aIC 558	1.95	Ventral Group of the Dorsal Thalamus	Thalamus	-1.4	85772	586216	0.037	0.356958	34.5794	NaN	NaN
1305	AAV	CamKIIa	aIC	aIC 558	1.95	Posterior Complex of the Thalamus	Thalamus	-1.4	292	488808	0.0001493	0.00121522	0.139533	NaN	NaN
1306	AAV	CamKIIa	aIC	aIC 558	1.95	Anterodorsal Thalamic Nucleus	Thalamus	-1.4	44	430099	2.56e-05	0.000183115	0.0239252	NaN	NaN
1307	AAV	CamKIIa	aIC	aIC 558	1.95	Hypothalamic Medial Zone	Hypothalamus	-1.4	96	509175	4.71e-05	0.000399524	0.0440187	NaN	NaN
1308	AAV	CamKIIa	aIC	aIC 558	1.95	Hypothalamic Lateral Zone	Hypothalamus	-1.4	412	830986	0.0001239	0.00171462	0.115794	NaN	NaN
1309	AAV	CamKIIa	aIC	aIC 558	1.95	Hypothalamic Lateral Zone	Hypothalamus	-1.4	16	108994	3.67e-05	6.65873e-05	0.0342991	NaN	NaN
1310	AAV	CamKIIa	aIC	aIC 558	1.95	Mediodorsal Thalamic Nuclei	Thalamus	-1.4	17016	132184	0.032	0.0708155	29.9065	NaN	NaN
1311	AAV	CamKIIa	aIC	aIC 558	1.95	Intralaminar Nuclei of the Dorsal Thalamus	Thalamus	-1.4	2224	223047	0.002	0.00925563	1.86916	NaN	NaN
1312	AAV	CamKIIa	aIC	aIC 558	1.95	Parietal Cortex	Association Cortex	-1.4	452	448477	0.000252	0.00188109	0.235514	NaN	NaN
1313	AAV	CamKIIa	aIC	aIC 558	1.95	Basolateral Nucleus	Amygdala	-1.4	328	98232.7	0.0008348	0.00136504	0.780187	NaN	NaN
1314	AAV	CamKIIa	aIC	aIC 558	1.95	Basomedial Nucleus	Amygdala	-1.4	128	406038	7.88e-05	0.000532698	0.0736449	NaN	NaN
1315	AAV	CamKIIa	aIC	aIC 558	1.95	Basomedial Nucleus	Amygdala	-1.4	12	166575	1.8e-05	4.99404e-05	0.0168224	NaN	NaN
1316	AAV	CamKIIa	aIC	aIC 558	1.95	Globus Pallidus	Pallidum	-1.4	60	320840	4.68e-05	0.000249702	0.0437383	NaN	NaN
1317	AAV	CamKIIa	aIC	aIC 558	1.95	Central Nucleus of Amygdala	Amygdala	-1.4	132	226026	0.000146	0.000549345	0.136449	NaN	NaN
1318	AAV	CamKIIa	aIC	aIC 558	1.95	Caudate Putamen	Striatum	-1.4	2244	1.35388e+06	0.0004144	0.00933886	0.38729	NaN	NaN
1319	AAV	CamKIIa	aIC	aIC 558	1.95	Mediodorsal Thalamic Nuclei	Thalamus	-1.4	40	209170	4.78e-05	0.000166468	0.0446729	NaN	NaN
1320	AAV	CamKIIa	aIC	aIC 558	1.95	Intralaminar Nuclei of the Dorsal Thalamus	Thalamus	-1.4	160	258400	0.0001548	0.000665873	0.144673	NaN	NaN
1321	AAV	CamKIIa	aIC	aIC 558	1.95	Hypothalamic Lateral Zone	Hypothalamus	-1.4	1976	315423	0.002	0.00822353	1.86916	NaN	NaN
1322	AAV	CamKIIa	aIC	aIC 558	1.95	Mediodorsal Thalamic Nuclei	Thalamus	-1.4	6232	312169	0.005	0.0259357	4.6729	NaN	NaN
1323	AAV	CamKIIa	aIC	aIC 558	1.95	Habenular Nuclei	Hypothalamus	-1.4	36	107390	8.38e-05	0.000149821	0.0783178	NaN	NaN
1324	AAV	CamKIIa	aIC	aIC 558	1.95	Intralaminar Nuclei of the Dorsal Thalamus	Thalamus	-1.4	7128	91862.3	0.019	0.0296646	17.757	NaN	NaN
1325	AAV	CamKIIa	aIC	aIC 558	1.95	Intralaminar Nuclei of the Dorsal Thalamus	Thalamus	-1.4	704	52970.7	0.003	0.00292984	2.80374	NaN	NaN
1326	AAV	CamKIIa	aIC	aIC 558	1.95	Intralaminar Nuclei of the Dorsal Thalamus	Thalamus	-1.4	20	59038.6	8.47e-05	8.32341e-05	0.0791589	NaN	NaN
1327	AAV	CamKIIa	aIC	aIC 558	1.95	Intralaminar Nuclei of the Dorsal Thalamus	Thalamus	-1.4	2772	47287.7	0.015	0.0115362	14.0187	NaN	NaN
1328	AAV	CamKIIa	aIC	aIC 558	1.95	Ectorhinal Cortex	Association Cortex	-1.5	208	1.73572e+06	3e-05	0.000865634	0.0280374	NaN	NaN
1329	AAV	CamKIIa	aIC	aIC 558	1.95	Perirhinal Cortex	Association Cortex	-1.5	976	1.16101e+06	0.0002102	0.00406182	0.196449	NaN	NaN
1330	AAV	CamKIIa	aIC	aIC 558	1.95	Basolateral Nucleus	Amygdala	-1.5	124	288016	0.0001076	0.000516051	0.100561	NaN	NaN
1331	AAV	CamKIIa	aIC	aIC 558	1.95	Piriform Area	Piriform Cortex	-1.5	32	4.31617e+06	1.85e-06	0.000133175	0.00172897	NaN	NaN
1332	AAV	CamKIIa	aIC	aIC 558	1.95	Hypothalamic Lateral Zone	Hypothalamus	-1.5	688	1.79169e+06	9.6e-05	0.00286325	0.0897196	NaN	NaN
1333	AAV	CamKIIa	aIC	aIC 558	1.95	Ventral Pallidum	Pallidum	-1.5	1612	3.89762e+06	0.0001034	0.00670867	0.0966355	NaN	NaN
1334	AAV	CamKIIa	aIC	aIC 558	1.95	Ventral Group of the Dorsal Thalamus	Thalamus	-1.5	138588	1.83803e+06	0.019	0.576762	17.757	NaN	NaN
1335	AAV	CamKIIa	aIC	aIC 558	1.95	Posterior Complex of the Thalamus	Thalamus	-1.5	140	1.47548e+06	2.37e-05	0.000582638	0.0221495	NaN	NaN
1336	AAV	CamKIIa	aIC	aIC 558	1.95	Hypothalamic Lateral Zone	Hypothalamus	-1.5	17808	675456	0.007	0.0741116	6.54206	NaN	NaN
1337	AAV	CamKIIa	aIC	aIC 558	1.95	Hypothalamic Lateral Zone	Hypothalamus	-1.5	924	2.86729e+06	8.06e-05	0.00384541	0.0753271	NaN	NaN
1338	AAV	CamKIIa	aIC	aIC 558	1.95	Mediodorsal Thalamic Nuclei	Thalamus	-1.5	100	428312	5.84e-05	0.00041617	0.0545794	NaN	NaN
1339	AAV	CamKIIa	aIC	aIC 558	1.95	Intralaminar Nuclei of the Dorsal Thalamus	Thalamus	-1.5	67652	372179	0.045	0.281548	42.0561	NaN	NaN
1340	AAV	CamKIIa	aIC	aIC 558	1.95	Intralaminar Nuclei of the Dorsal Thalamus	Thalamus	-1.5	37792	419237	0.023	0.157279	21.4953	NaN	NaN
1341	AAV	CamKIIa	aIC	aIC 558	1.95	Intralaminar Nuclei of the Dorsal Thalamus	Thalamus	-1.5	32	92118.9	8.68e-05	0.000133175	0.0811215	NaN	NaN
1342	AAV	CamKIIa	aIC	aIC 558	1.95	Mediodorsal Thalamic Nuclei	Thalamus	-1.5	162400	1.1099e+06	0.037	0.675861	34.5794	NaN	NaN
1343	AAV	CamKIIa	aIC	aIC 558	1.95	Somatosensory Cortex, secondary	Sensory Cortex	-1.5	20	4.97277e+06	1.01e-06	8.32341e-05	0.000943925	NaN	NaN
1344	AAV	CamKIIa	aIC	aIC 558	1.95	Somatosensory Cortex, primary	Sensory Cortex	-1.5	380	1.38397e+07	6.86e-06	0.00158145	0.00641121	NaN	NaN
1345	AAV	CamKIIa	aIC	aIC 558	1.95	Hypothalamic Lateral Zone	Hypothalamus	-1.5	48	321903	3.73e-05	0.000199762	0.0348598	NaN	NaN
1346	AAV	CamKIIa	aIC	aIC 558	1.95	Ventral Group of the Dorsal Thalamus	Thalamus	-1.5	207808	1.82307e+06	0.028	0.864835	26.1682	NaN	NaN
1347	AAV	CamKIIa	aIC	aIC 558	1.95	Intralaminar Nuclei of the Dorsal Thalamus	Thalamus	-1.5	152	318273	0.0001194	0.000632579	0.111589	NaN	NaN
1348	AAV	CamKIIa	aIC	aIC 558	1.95	Paraventricular Thalamic Nucleus	Thalamus	-1.5	1216	854066	0.0003559	0.00506063	0.332617	NaN	NaN
1349	AAV	CamKIIa	aIC	aIC 558	1.95	Retrosplenial Cortex	Association Cortex	-1.6	20	1.15925e+06	4.31e-06	8.32341e-05	0.00402804	NaN	NaN
1350	AAV	CamKIIa	aIC	aIC 558	1.95	Retrosplenial Cortex	Association Cortex	-1.6	0	247410	0	0	0	NaN	NaN
1351	AAV	CamKIIa	aIC	aIC 558	1.95	Parietal Cortex	Association Cortex	-1.6	0	291380	0	0	0	NaN	NaN
1352	AAV	CamKIIa	aIC	aIC 558	1.95	Somatosensory Cortex, primary	Sensory Cortex	-1.6	712	5.93399e+06	3e-05	0.00296313	0.0280374	NaN	NaN
1353	AAV	CamKIIa	aIC	aIC 558	1.95	Ectorhinal Cortex	Association Cortex	-1.6	2192	3.18567e+06	0.000172	0.00912245	0.160748	NaN	NaN
1354	AAV	CamKIIa	aIC	aIC 558	1.95	Perirhinal Cortex	Association Cortex	-1.6	4216	2.2524e+06	0.0004679	0.0175457	0.43729	NaN	NaN
1355	AAV	CamKIIa	aIC	aIC 558	1.95	Basolateral Nucleus	Amygdala	-1.6	584	406735	0.000359	0.00243043	0.335514	NaN	NaN
1356	AAV	CamKIIa	aIC	aIC 558	1.95	Lateral Amygdala	Amygdala	-1.6	112	1.64115e+06	1.71e-05	0.000466111	0.0159813	NaN	NaN
1357	AAV	CamKIIa	aIC	aIC 558	1.95	Basolateral Nucleus	Amygdala	-1.6	0	1.76585e+06	0	0	0	NaN	NaN
1358	AAV	CamKIIa	aIC	aIC 558	1.95	Basolateral Nucleus	Amygdala	-1.6	52	288016	4.51e-05	0.000216409	0.0421495	NaN	NaN
1359	AAV	CamKIIa	aIC	aIC 558	1.95	Endopiriform Nucleus	Olfactory areas	-1.6	140	877256	3.99e-05	0.000582638	0.0372897	NaN	NaN
1360	AAV	CamKIIa	aIC	aIC 558	1.95	Piriform Area	Piriform Cortex	-1.6	144	3.92224e+06	9.18e-06	0.000599285	0.00857944	NaN	NaN
1361	AAV	CamKIIa	aIC	aIC 558	1.95	Caudate Putamen	Striatum	-1.6	212	3.87266e+06	1.37e-05	0.000882281	0.0128037	NaN	NaN
1362	AAV	CamKIIa	aIC	aIC 558	1.95	Hypothalamic Lateral Zone	Hypothalamus	-1.6	2920	1.31062e+06	0.000557	0.0121522	0.520561	NaN	NaN
1363	AAV	CamKIIa	aIC	aIC 558	1.95	Ventral Pallidum	Pallidum	-1.6	17780	3.94838e+06	0.001	0.0739951	0.934579	NaN	NaN
1364	AAV	CamKIIa	aIC	aIC 558	1.95	Ventral Group of the Dorsal Thalamus	Thalamus	-1.6	445488	1.83803e+06	0.061	1.85399	57.0093	NaN	NaN
1365	AAV	CamKIIa	aIC	aIC 558	1.95	Posterior Complex of the Thalamus	Thalamus	-1.6	992	1.314e+06	0.0001887	0.00412841	0.176355	NaN	NaN
1366	AAV	CamKIIa	aIC	aIC 558	1.95	Habenular Nuclei	Hypothalamus	-1.6	224	709774	7.89e-05	0.000932222	0.0737383	NaN	NaN
1367	AAV	CamKIIa	aIC	aIC 558	1.95	Hypothalamic Lateral Zone	Hypothalamus	-1.6	20940	880611	0.006	0.0871461	5.60748	NaN	NaN
1368	AAV	CamKIIa	aIC	aIC 558	1.95	Mediodorsal Thalamic Nuclei	Thalamus	-1.6	140	1.38698e+06	2.52e-05	0.000582638	0.0235514	NaN	NaN
1369	AAV	CamKIIa	aIC	aIC 558	1.95	Hypothalamic Lateral Zone	Hypothalamus	-1.6	2276	3.1955e+06	0.0001781	0.00947204	0.166449	NaN	NaN
1370	AAV	CamKIIa	aIC	aIC 558	1.95	Mediodorsal Thalamic Nuclei	Thalamus	-1.6	53620	428312	0.031	0.223151	28.972	NaN	NaN
1371	AAV	CamKIIa	aIC	aIC 558	1.95	Intralaminar Nuclei of the Dorsal Thalamus	Thalamus	-1.6	15360	545674	0.007	0.0639238	6.54206	NaN	NaN
1372	AAV	CamKIIa	aIC	aIC 558	1.95	Intralaminar Nuclei of the Dorsal Thalamus	Thalamus	-1.6	30908	509028	0.015	0.12863	14.0187	NaN	NaN
1373	AAV	CamKIIa	aIC	aIC 558	1.95	Intralaminar Nuclei of the Dorsal Thalamus	Thalamus	-1.6	130984	419237	0.078	0.545117	72.8972	NaN	NaN
1374	AAV	CamKIIa	aIC	aIC 558	1.95	Intralaminar Nuclei of the Dorsal Thalamus	Thalamus	-1.6	28720	92118.9	0.078	0.119524	72.8972	NaN	NaN
1375	AAV	CamKIIa	aIC	aIC 558	1.95	Mediodorsal Thalamic Nuclei	Thalamus	-1.6	125340	1.1568e+06	0.027	0.521628	25.2336	NaN	NaN
1376	AAV	CamKIIa	aIC	aIC 558	1.95	Somatosensory Cortex, secondary	Sensory Cortex	-1.6	1048	3.76416e+06	6.96e-05	0.00436146	0.0650467	NaN	NaN
1377	AAV	CamKIIa	aIC	aIC 558	1.95	Auditory Cortex, secondary or higher	Sensory Cortex	-1.6	440	4.41294e+06	2.49e-05	0.00183115	0.023271	NaN	NaN
1378	AAV	CamKIIa	aIC	aIC 558	1.95	Ventral Group of the Dorsal Thalamus	Thalamus	-1.6	136212	1.29148e+06	0.026	0.566874	24.2991	NaN	NaN
1379	AAV	CamKIIa	aIC	aIC 558	1.95	Retrosplenial Cortex	Association Cortex	-1.7	84	1.46469e+06	1.43e-05	0.000349583	0.0133645	NaN	NaN
1380	AAV	CamKIIa	aIC	aIC 558	1.95	Retrosplenial Cortex	Association Cortex	-1.7	12	1.38297e+06	2.17e-06	4.99404e-05	0.00202804	NaN	NaN
1381	AAV	CamKIIa	aIC	aIC 558	1.95	Parietal Cortex	Association Cortex	-1.7	40	1.18476e+06	8.44e-06	0.000166468	0.00788785	NaN	NaN
1382	AAV	CamKIIa	aIC	aIC 558	1.95	Somatosensory Cortex, primary	Sensory Cortex	-1.7	2724	7.59511e+06	8.97e-05	0.0113365	0.0838318	NaN	NaN
1383	AAV	CamKIIa	aIC	aIC 558	1.95	Ectorhinal Cortex	Association Cortex	-1.7	8240	1.99261e+06	0.001	0.0342924	0.934579	NaN	NaN
1384	AAV	CamKIIa	aIC	aIC 558	1.95	Perirhinal Cortex	Association Cortex	-1.7	14160	2.2524e+06	0.002	0.0589297	1.86916	NaN	NaN
1385	AAV	CamKIIa	aIC	aIC 558	1.95	Basolateral Nucleus	Amygdala	-1.7	3636	406735	0.002	0.015132	1.86916	NaN	NaN
1386	AAV	CamKIIa	aIC	aIC 558	1.95	Lateral Amygdala	Amygdala	-1.7	236	1.64115e+06	3.6e-05	0.000982162	0.0336449	NaN	NaN
1387	AAV	CamKIIa	aIC	aIC 558	1.95	Basolateral Nucleus	Amygdala	-1.7	68	1.76585e+06	9.63e-06	0.000282996	0.009	NaN	NaN
1388	AAV	CamKIIa	aIC	aIC 558	1.95	Basolateral Nucleus	Amygdala	-1.7	192	288016	0.0001667	0.000799047	0.155794	NaN	NaN
1389	AAV	CamKIIa	aIC	aIC 558	1.95	Endopiriform Nucleus	Olfactory areas	-1.7	28	877256	7.98e-06	0.000116528	0.00745794	NaN	NaN
1390	AAV	CamKIIa	aIC	aIC 558	1.95	Piriform Area	Piriform Cortex	-1.7	52	3.92224e+06	3.31e-06	0.000216409	0.00309346	NaN	NaN
1391	AAV	CamKIIa	aIC	aIC 558	1.95	Caudate Putamen	Striatum	-1.7	624	3.87266e+06	4.03e-05	0.0025969	0.0376636	NaN	NaN
1392	AAV	CamKIIa	aIC	aIC 558	1.95	Hypothalamic Lateral Zone	Hypothalamus	-1.7	1316	1.45619e+06	0.0002259	0.0054768	0.211121	NaN	NaN
1393	AAV	CamKIIa	aIC	aIC 558	1.95	Ventral Pallidum	Pallidum	-1.7	37808	3.94838e+06	0.002	0.157346	1.86916	NaN	NaN
1394	AAV	CamKIIa	aIC	aIC 558	1.95	Ventral Group of the Dorsal Thalamus	Thalamus	-1.7	318228	1.83803e+06	0.043	1.32437	40.1869	NaN	NaN
1395	AAV	CamKIIa	aIC	aIC 558	1.95	Posterior Complex of the Thalamus	Thalamus	-1.7	125108	2.52006e+06	0.012	0.520662	11.215	NaN	NaN
1396	AAV	CamKIIa	aIC	aIC 558	1.95	Habenular Nuclei	Hypothalamus	-1.7	156	709774	5.5e-05	0.000649226	0.0514019	NaN	NaN
1397	AAV	CamKIIa	aIC	aIC 558	1.95	Hypothalamic Lateral Zone	Hypothalamus	-1.7	11988	781746	0.004	0.0498905	3.73832	NaN	NaN
1398	AAV	CamKIIa	aIC	aIC 558	1.95	Mediodorsal Thalamic Nuclei	Thalamus	-1.7	560	2.18131e+06	6.42e-05	0.00233055	0.06	NaN	NaN
1399	AAV	CamKIIa	aIC	aIC 558	1.95	Hypothalamic Lateral Zone	Hypothalamus	-1.7	1320	3.1955e+06	0.0001033	0.00549345	0.0965421	NaN	NaN
1400	AAV	CamKIIa	aIC	aIC 558	1.95	Mediodorsal Thalamic Nuclei	Thalamus	-1.7	6776	428312	0.004	0.0281997	3.73832	NaN	NaN
1401	AAV	CamKIIa	aIC	aIC 558	1.95	Intralaminar Nuclei of the Dorsal Thalamus	Thalamus	-1.7	656	545674	0.0003005	0.00273008	0.280841	NaN	NaN
1402	AAV	CamKIIa	aIC	aIC 558	1.95	Intralaminar Nuclei of the Dorsal Thalamus	Thalamus	-1.7	46620	509028	0.023	0.194019	21.4953	NaN	NaN
1403	AAV	CamKIIa	aIC	aIC 558	1.95	Intralaminar Nuclei of the Dorsal Thalamus	Thalamus	-1.7	105860	419237	0.063	0.440558	58.8785	NaN	NaN
1404	AAV	CamKIIa	aIC	aIC 558	1.95	Intralaminar Nuclei of the Dorsal Thalamus	Thalamus	-1.7	11264	92118.9	0.031	0.0468774	28.972	NaN	NaN
1405	AAV	CamKIIa	aIC	aIC 558	1.95	Mediodorsal Thalamic Nuclei	Thalamus	-1.7	107040	1.1568e+06	0.023	0.445469	21.4953	NaN	NaN
1406	AAV	CamKIIa	aIC	aIC 558	1.95	Somatosensory Cortex, secondary	Sensory Cortex	-1.7	284	2.8808e+06	2.47e-05	0.00118192	0.0230841	NaN	NaN
1407	AAV	CamKIIa	aIC	aIC 558	1.95	Auditory Cortex, secondary or higher	Sensory Cortex	-1.7	1776	4.73813e+06	9.37e-05	0.00739118	0.0875701	NaN	NaN
1408	AAV	CamKIIa	aIC	aIC 558	1.95	Temporal Association Cortex	Association Cortex	-1.7	672	1.31922e+06	0.0001273	0.00279666	0.118972	NaN	NaN
1409	AAV	CamKIIa	aIC	aIC 558	1.95	Ectorhinal Cortex	Association Cortex	-1.9	2392	1.6959e+06	0.0003526	0.00995479	0.329533	NaN	NaN
1410	AAV	CamKIIa	aIC	aIC 558	1.95	Hypothalamic Lateral Zone	Hypothalamus	-1.9	12280	821573	0.004	0.0511057	3.73832	NaN	NaN
1411	AAV	CamKIIa	aIC	aIC 558	1.95	Intralaminar Nuclei of the Dorsal Thalamus	Thalamus	-1.9	16668	344800	0.012	0.0693673	11.215	NaN	NaN
1412	AAV	CamKIIa	aIC	aIC 558	1.95	Intralaminar Nuclei of the Dorsal Thalamus	Thalamus	-1.9	12240	484665	0.006	0.0509392	5.60748	NaN	NaN
1413	AAV	CamKIIa	aIC	aIC 558	1.95	Somatosensory Cortex, secondary	Sensory Cortex	-1.9	1112	4.60181e+06	6.04e-05	0.00462781	0.0564486	NaN	NaN
1414	AAV	CamKIIa	aIC	aIC 558	1.95	Retrosplenial Cortex	Association Cortex	-1.9	240	1.874e+06	3.2e-05	0.000998809	0.0299065	NaN	NaN
1415	AAV	CamKIIa	aIC	aIC 558	1.95	Retrosplenial Cortex	Association Cortex	-1.9	372	1.68072e+06	5.53e-05	0.00154815	0.0516822	NaN	NaN
1416	AAV	CamKIIa	aIC	aIC 558	1.95	Parietal Cortex	Association Cortex	-1.9	672	6.16512e+06	2.73e-05	0.00279666	0.025514	NaN	NaN
1417	AAV	CamKIIa	aIC	aIC 558	1.95	Somatosensory Cortex, primary	Sensory Cortex	-1.9	2592	8.69833e+06	7.45e-05	0.0107871	0.0696262	NaN	NaN
1418	AAV	CamKIIa	aIC	aIC 558	1.95	Temporal Association Cortex	Association Cortex	-1.9	148	1.04986e+06	3.52e-05	0.000615932	0.0328972	NaN	NaN
1419	AAV	CamKIIa	aIC	aIC 558	1.95	Perirhinal Cortex	Association Cortex	-1.9	3920	1.33608e+06	0.0007335	0.0163139	0.685514	NaN	NaN
1420	AAV	CamKIIa	aIC	aIC 558	1.95	Entorhinal Cortex	Association Cortex	-1.9	200	589864	8.48e-05	0.000832341	0.0792523	NaN	NaN
1421	AAV	CamKIIa	aIC	aIC 558	1.95	Endopiriform Nucleus	Olfactory areas	-1.9	16	249949	1.6e-05	6.65873e-05	0.0149533	NaN	NaN
1422	AAV	CamKIIa	aIC	aIC 558	1.95	Basolateral Nucleus	Amygdala	-1.9	1540	606683	0.0006346	0.00640902	0.593084	NaN	NaN
1423	AAV	CamKIIa	aIC	aIC 558	1.95	Hypothalamic Lateral Zone	Hypothalamus	-1.9	3964	1.84783e+06	0.0005363	0.016497	0.501215	NaN	NaN
1424	AAV	CamKIIa	aIC	aIC 558	1.95	Ventral Group of the Dorsal Thalamus	Thalamus	-1.9	14268	1.23592e+06	0.003	0.0593792	2.80374	NaN	NaN
1425	AAV	CamKIIa	aIC	aIC 558	1.95	Ventral Group of the Dorsal Thalamus	Thalamus	-1.9	26920	769014	0.009	0.112033	8.41121	NaN	NaN
1426	AAV	CamKIIa	aIC	aIC 558	1.95	Ventral Pallidum	Pallidum	-1.9	16556	3.69961e+06	0.001	0.0689012	0.934579	NaN	NaN
1427	AAV	CamKIIa	aIC	aIC 558	1.95	Posterior Complex of the Thalamus	Thalamus	-1.9	198684	3.87069e+06	0.013	0.826864	12.1495	NaN	NaN
1428	AAV	CamKIIa	aIC	aIC 558	1.95	Mediodorsal Thalamic Nuclei	Thalamus	-1.9	13080	799107	0.004	0.0544351	3.73832	NaN	NaN
1429	AAV	CamKIIa	aIC	aIC 558	1.95	Intralaminar Nuclei of the Dorsal Thalamus	Thalamus	-1.9	128	588929	5.43e-05	0.000532698	0.0507477	NaN	NaN
1430	AAV	CamKIIa	aIC	aIC 558	1.95	Ectorhinal Cortex	Association Cortex	-2.2	1224	1.6959e+06	0.0001804	0.00509392	0.168598	NaN	NaN
1431	AAV	CamKIIa	aIC	aIC 558	1.95	Retrosplenial Cortex	Association Cortex	-2.2	164	1.874e+06	2.19e-05	0.000682519	0.0204673	NaN	NaN
1432	AAV	CamKIIa	aIC	aIC 558	1.95	Retrosplenial Cortex	Association Cortex	-2.2	112	1.68072e+06	1.67e-05	0.000466111	0.0156075	NaN	NaN
1433	AAV	CamKIIa	aIC	aIC 558	1.95	Temporal Association Cortex	Association Cortex	-2.2	52	1.04986e+06	1.24e-05	0.000216409	0.0115888	NaN	NaN
1434	AAV	CamKIIa	aIC	aIC 558	1.95	Perirhinal Cortex	Association Cortex	-2.2	736	1.33608e+06	0.0001377	0.00306301	0.128692	NaN	NaN
1435	AAV	CamKIIa	aIC	aIC 558	1.95	Entorhinal Cortex	Association Cortex	-2.2	56	589864	2.37e-05	0.000233055	0.0221495	NaN	NaN
1436	AAV	CamKIIa	aIC	aIC 558	1.95	Basolateral Nucleus	Amygdala	-2.2	468	1.88243e+06	6.22e-05	0.00194768	0.0581308	NaN	NaN
1437	AAV	CamKIIa	aIC	aIC 558	1.95	Hypothalamic Lateral Zone	Hypothalamus	-2.2	13164	979421	0.003	0.0547847	2.80374	NaN	NaN
1438	AAV	CamKIIa	aIC	aIC 558	1.95	Hypothalamic Lateral Zone	Hypothalamus	-2.2	13608	2.13093e+06	0.002	0.0566325	1.86916	NaN	NaN
1439	AAV	CamKIIa	aIC	aIC 558	1.95	Substantia Nigra	Midbrain	-2.2	620	824322	0.000188	0.00258026	0.175701	NaN	NaN
1440	AAV	CamKIIa	aIC	aIC 558	1.95	Ventral Pallidum	Pallidum	-2.2	6452	1.21822e+06	0.001	0.0268513	0.934579	NaN	NaN
1441	AAV	CamKIIa	aIC	aIC 558	1.95	Ventral Group of the Dorsal Thalamus	Thalamus	-2.2	4892	321536	0.004	0.0203591	3.73832	NaN	NaN
1442	AAV	CamKIIa	aIC	aIC 558	1.95	Intralaminar Nuclei of the Dorsal Thalamus	Thalamus	-2.2	63504	3.51677e+06	0.005	0.264285	4.6729	NaN	NaN
1443	AAV	CamKIIa	aIC	aIC 558	1.95	Posterior Complex of the Thalamus	Thalamus	-2.2	47720	3.24484e+06	0.004	0.198596	3.73832	NaN	NaN
1444	AAV	CamKIIa	aIC	aIC 558	1.95	Paraventricular Thalamic Nucleus	Midbrain	-2.2	4612	2.04108e+06	0.0005649	0.0191938	0.527944	NaN	NaN
1445	AAV	CamKIIa	aIC	aIC 558	1.95	Hypothalamic Medial Zone	Hypothalamus	-2.2	48	1.26706e+06	9.47e-06	0.000199762	0.00885047	NaN	NaN
1446	AAV	CamKIIa	aIC	aIC 558	1.95	Hypothalamic Lateral Zone	Hypothalamus	-2.2	528	3.93047e+06	3.36e-05	0.00219738	0.0314019	NaN	NaN
1447	AAV	CamKIIa	aIC	aIC 558	1.95	Auditory Cortex, primary	Sensory Cortex	-2.2	1080	1.04797e+07	2.58e-05	0.00449464	0.0241121	NaN	NaN
1448	AAV	CamKIIa	aIC	aIC 558	1.95	Somatosensory Cortex, primary	Sensory Cortex	-2.2	84	2.15808e+06	9.73e-06	0.000349583	0.00909346	NaN	NaN
1449	AAV	CamKIIa	aIC	aIC 558	1.95	Visual Cortex, primary	Sensory Cortex	-2.2	568	7.09004e+06	2e-05	0.00236385	0.0186916	NaN	NaN
1450	AAV	CamKIIa	aIC	aIC 558	1.95	Ectorhinal Cortex	Association Cortex	-2.4	16	1.6959e+06	2.36e-06	6.65873e-05	0.00220561	NaN	NaN
1451	AAV	CamKIIa	aIC	aIC 558	1.95	Retrosplenial Cortex	Association Cortex	-2.4	16	1.874e+06	2.13e-06	6.65873e-05	0.00199065	NaN	NaN
1452	AAV	CamKIIa	aIC	aIC 558	1.95	Retrosplenial Cortex	Association Cortex	-2.4	8	1.68072e+06	1.19e-06	3.32936e-05	0.00111215	NaN	NaN
1453	AAV	CamKIIa	aIC	aIC 558	1.95	Temporal Association Cortex	Association Cortex	-2.4	36	1.04986e+06	8.57e-06	0.000149821	0.00800935	NaN	NaN
1454	AAV	CamKIIa	aIC	aIC 558	1.95	Perirhinal Cortex	Association Cortex	-2.4	260	1.33608e+06	4.87e-05	0.00108204	0.045514	NaN	NaN
1455	AAV	CamKIIa	aIC	aIC 558	1.95	Entorhinal Cortex	Association Cortex	-2.4	16	589864	6.78e-06	6.65873e-05	0.00633645	NaN	NaN
1456	AAV	CamKIIa	aIC	aIC 558	1.95	Basolateral Nucleus	Amygdala	-2.4	256	1.88243e+06	3.4e-05	0.0010654	0.0317757	NaN	NaN
1457	AAV	CamKIIa	aIC	aIC 558	1.95	Substantia Nigra	Midbrain	-2.4	1344	637802	0.0005268	0.00559333	0.492336	NaN	NaN
1458	AAV	CamKIIa	aIC	aIC 558	1.95	Ventral Pallidum	Pallidum	-2.4	4232	1.21822e+06	0.0008685	0.0176123	0.811682	NaN	NaN
1459	AAV	CamKIIa	aIC	aIC 558	1.95	Ventral Group of the Dorsal Thalamus	Thalamus	-2.4	3068	321536	0.002	0.0127681	1.86916	NaN	NaN
1460	AAV	CamKIIa	aIC	aIC 558	1.95	Intralaminar Nuclei of the Dorsal Thalamus	Thalamus	-2.4	74612	2.64873e+06	0.007	0.310513	6.54206	NaN	NaN
1461	AAV	CamKIIa	aIC	aIC 558	1.95	Posterior Complex of the Thalamus	Thalamus	-2.4	2292	2.85085e+06	0.000201	0.00953862	0.18785	NaN	NaN
1462	AAV	CamKIIa	aIC	aIC 558	1.95	Periaqueductal Gray	Midbrain	-2.4	772	1.38374e+06	0.0001395	0.00321283	0.130374	NaN	NaN
1463	AAV	CamKIIa	aIC	aIC 558	1.95	Hypothalamic Medial Zone	Hypothalamus	-2.4	16	1.26706e+06	3.16e-06	6.65873e-05	0.00295327	NaN	NaN
1464	AAV	CamKIIa	aIC	aIC 558	1.95	Auditory Cortex, primary	Sensory Cortex	-2.4	28	1.04797e+07	6.68e-07	0.000116528	0.000624299	NaN	NaN
1465	AAV	CamKIIa	aIC	aIC 558	1.95	Somatosensory Cortex, primary	Sensory Cortex	-2.4	4	2.15808e+06	4.63e-07	1.66468e-05	0.00043271	NaN	NaN
1466	AAV	CamKIIa	aIC	aIC 558	1.95	Visual Cortex, primary	Sensory Cortex	-2.4	48	7.09004e+06	1.69e-06	0.000199762	0.00157944	NaN	NaN
1467	AAV	CamKIIa	aIC	aIC 558	1.95	Hypothalamic Lateral Zone	Hypothalamus	-2.4	16292	1.07248e+06	0.004	0.0678025	3.73832	NaN	NaN
1468	AAV	CamKIIa	aIC	aIC 558	1.95	Hypothalamic Lateral Zone	Hypothalamus	-2.4	1204	324259	0.0009283	0.00501069	0.86757	NaN	NaN
1469	AAV	CamKIIa	aIC	aIC 558	1.95	Hypothalamic Lateral Zone	Hypothalamus	-2.4	2828	4.35391e+06	0.0001624	0.0117693	0.151776	NaN	NaN
1470	AAV	CamKIIa	aIC	aIC 558	1.95	Ectorhinal Cortex	Association Cortex	-2.5	120	1.75009e+06	1.71e-05	0.000499404	0.0159813	NaN	NaN
1471	AAV	CamKIIa	aIC	aIC 558	1.95	Retrosplenial Cortex	Association Cortex	-2.5	144	2.01311e+06	1.79e-05	0.000599285	0.016729	NaN	NaN
1472	AAV	CamKIIa	aIC	aIC 558	1.95	Retrosplenial Cortex	Association Cortex	-2.5	148	1.65669e+06	2.23e-05	0.000615932	0.0208411	NaN	NaN
1473	AAV	CamKIIa	aIC	aIC 558	1.95	Temporal Association Cortex	Association Cortex	-2.5	8	1.80378e+06	1.11e-06	3.32936e-05	0.00103738	NaN	NaN
1474	AAV	CamKIIa	aIC	aIC 558	1.95	Perirhinal Cortex	Association Cortex	-2.5	244	1.39011e+06	4.39e-05	0.00101546	0.041028	NaN	NaN
1475	AAV	CamKIIa	aIC	aIC 558	1.95	Entorhinal Cortex	Association Cortex	-2.5	16	1.651e+06	2.42e-06	6.65873e-05	0.00226168	NaN	NaN
1476	AAV	CamKIIa	aIC	aIC 558	1.95	Auditory Cortex, primary	Sensory Cortex	-2.5	1844	9.52816e+06	4.84e-05	0.00767418	0.0452336	NaN	NaN
1477	AAV	CamKIIa	aIC	aIC 558	1.95	Visual Cortex, primary	Sensory Cortex	-2.5	556	9.55341e+06	1.46e-05	0.00231391	0.0136449	NaN	NaN
1478	AAV	CamKIIa	aIC	aIC 558	1.95	Substantia Nigra	Midbrain	-2.5	9660	952959	0.003	0.0402021	2.80374	NaN	NaN
1479	AAV	CamKIIa	aIC	aIC 558	1.95	Hypothalamic Medial Zone	Hypothalamus	-2.5	22492	239298	0.023	0.093605	21.4953	NaN	NaN
1480	AAV	CamKIIa	aIC	aIC 558	1.95	Hypothalamic Lateral Zone	Hypothalamus	-2.5	23012	531513	0.011	0.0957691	10.2804	NaN	NaN
1481	AAV	CamKIIa	aIC	aIC 558	1.95	Hypothalamic Lateral Zone	Hypothalamus	-2.5	35972	1.93849e+06	0.005	0.149705	4.6729	NaN	NaN
1482	AAV	CamKIIa	aIC	aIC 558	1.95	Posterior Complex of the Thalamus	Thalamus	-2.5	7512	401153	0.005	0.0312627	4.6729	NaN	NaN
1483	AAV	CamKIIa	aIC	aIC 558	1.95	Posterior Complex of the Thalamus	Thalamus	-2.5	3700	162102	0.006	0.0153983	5.60748	NaN	NaN
1484	AAV	CamKIIa	aIC	aIC 558	1.95	Posterior Complex of the Thalamus	Thalamus	-2.5	9012	1.2545e+06	0.002	0.0375053	1.86916	NaN	NaN
1485	AAV	CamKIIa	aIC	aIC 558	1.95	Posterior Complex of the Thalamus	Thalamus	-2.5	3196	292599	0.003	0.0133008	2.80374	NaN	NaN
1486	AAV	CamKIIa	aIC	aIC 558	1.95	Hypothalamic Medial Zone	Hypothalamus	-2.5	880	642349	0.0003425	0.0036623	0.320093	NaN	NaN
1487	AAV	CamKIIa	aIC	aIC 558	1.95	Hypothalamic Lateral Zone	Hypothalamus	-2.5	2064	169361	0.003	0.00858976	2.80374	NaN	NaN
1488	AAV	CamKIIa	aIC	aIC 558	1.95	Hypothalamic Lateral Zone	Hypothalamus	-2.5	54908	2.67872e+06	0.005	0.228511	4.6729	NaN	NaN
1489	AAV	CamKIIa	aIC	aIC 558	1.95	Intralaminar Nuclei of the Dorsal Thalamus	Thalamus	-2.5	2328	117252	0.005	0.00968844	4.6729	NaN	NaN
1490	AAV	CamKIIa	aIC	aIC 558	1.95	Midbrain Reticular Nucleus	Midbrain	-2.5	5900	3.83259e+06	0.0003849	0.024554	0.35972	NaN	NaN
1491	AAV	CamKIIa	aIC	aIC 558	1.95	Substantia Nigra	Midbrain	-2.7	195036	1.80015e+06	0.027	0.811682	25.2336	NaN	NaN
1492	AAV	CamKIIa	aIC	aIC 558	1.95	Hypothalamic Medial Zone	Hypothalamus	-2.7	128	169187	0.0001891	0.000532698	0.176729	NaN	NaN
1493	AAV	CamKIIa	aIC	aIC 558	1.95	Substantia Nigra	Midbrain	-2.7	2348	1.15612e+06	0.0005077	0.00977168	0.474486	NaN	NaN
1494	AAV	CamKIIa	aIC	aIC 558	1.95	Posterior Complex of the Thalamus	Thalamus	-2.7	10648	719105	0.004	0.0443138	3.73832	NaN	NaN
1495	AAV	CamKIIa	aIC	aIC 558	1.95	Hypothalamic Medial Zone	Hypothalamus	-2.7	424	401749	0.0002638	0.00176456	0.246542	NaN	NaN
1496	AAV	CamKIIa	aIC	aIC 558	1.95	Ventral Tegmental Area	Midbrain	-2.7	14328	659544	0.005	0.0596289	4.6729	NaN	NaN
1497	AAV	CamKIIa	aIC	aIC 558	1.95	Ventral Tegmental Area	Midbrain	-2.7	18452	340125	0.014	0.0767917	13.0841	NaN	NaN
1498	AAV	CamKIIa	aIC	aIC 558	1.95	Hypothalamic Lateral Zone	Hypothalamus	-2.7	9276	2.31593e+06	0.001	0.038604	0.934579	NaN	NaN
1499	AAV	CamKIIa	aIC	aIC 558	1.95	Periaqueductal Gray	Midbrain	-2.7	2532	3.33433e+06	0.0001898	0.0105374	0.177383	NaN	NaN
1500	AAV	CamKIIa	aIC	aIC 558	1.95	Midbrain Reticular Nucleus	Midbrain	-2.7	7276	4.31915e+06	0.0004211	0.0302806	0.393551	NaN	NaN
1501	AAV	CamKIIa	aIC	aIC 558	1.95	Hypothalamic Lateral Zone	Hypothalamus	-2.7	1260	998936	0.0003153	0.00524375	0.294673	NaN	NaN
1502	AAV	CamKIIa	aIC	aIC 558	1.95	Posterior Complex of the Thalamus	Thalamus	-2.7	148	324369	0.0001141	0.000615932	0.106636	NaN	NaN
1503	AAV	CamKIIa	aIC	aIC 558	1.95	Substantia Nigra	Midbrain	-2.9	63552	2.32593e+06	0.007	0.264485	6.54206	NaN	NaN
1504	AAV	CamKIIa	aIC	aIC 558	1.95	Ventral Tegmental Area	Midbrain	-2.9	8204	1.36617e+06	0.002	0.0341426	1.86916	NaN	NaN
1505	AAV	CamKIIa	aIC	aIC 558	1.95	Ventral Tegmental Area	Midbrain	-2.9	138944	1.20423e+06	0.029	0.578244	27.1028	NaN	NaN
1506	AAV	CamKIIa	aIC	aIC 558	1.95	Hypothalamic Lateral Zone	Hypothalamus	-2.9	15000	986736	0.004	0.0624255	3.73832	NaN	NaN
1507	AAV	CamKIIa	aIC	aIC 558	1.95	Raphe Nuclei	Midbrain	-2.9	1028	662459	0.0003879	0.00427823	0.362523	NaN	NaN
1508	AAV	CamKIIa	aIC	aIC 558	1.95	Periaqueductal Gray	Midbrain	-2.9	204	1.30317e+06	3.91e-05	0.000848987	0.0365421	NaN	NaN
1509	AAV	CamKIIa	aIC	aIC 558	1.95	Raphe Nuclei	Midbrain	-2.9	408	88874.1	0.001	0.00169797	0.934579	NaN	NaN
1510	AAV	CamKIIa	aIC	aIC 558	1.95	Midbrain Reticular Nucleus	Midbrain	-2.9	2464	758391	0.0008122	0.0102544	0.759065	NaN	NaN
1511	AAV	CamKIIa	aIC	aIC 558	1.95	Posterior Complex of the Thalamus	Thalamus	-2.9	2488	327613	0.002	0.0103543	1.86916	NaN	NaN
1512	AAV	CamKIIa	aIC	aIC 558	1.95	Posterior Complex of the Thalamus	Thalamus	-2.9	980	544757	0.0004497	0.00407847	0.42028	NaN	NaN
1513	AAV	CamKIIa	aIC	aIC 558	1.95	Posterior Complex of the Thalamus	Thalamus	-2.9	2420	595372	0.001	0.0100713	0.934579	NaN	NaN
1514	AAV	CamKIIa	aIC	aIC 558	1.95	Midbrain Reticular Nucleus	Midbrain	-2.9	4984	4.93045e+06	0.0002527	0.0207419	0.236168	NaN	NaN
1515	AAV	CamKIIa	aIC	aIC 558	1.95	Hypothalamic Lateral Zone	Hypothalamus	-2.9	2112	2.20169e+06	0.0002398	0.00878952	0.224112	NaN	NaN
1516	AAV	CamKIIa	aIC	aIC 558	1.95	Substantia Nigra	Midbrain	-3.1	292696	3.88668e+06	0.019	1.21811	17.757	NaN	NaN
1517	AAV	CamKIIa	aIC	aIC 558	1.95	Raphe Nuclei	Midbrain	-3.1	644	168784	0.0009539	0.00268014	0.891495	NaN	NaN
1518	AAV	CamKIIa	aIC	aIC 558	1.95	Raphe Nuclei	Midbrain	-3.1	18312	624759	0.007	0.0762091	6.54206	NaN	NaN
1519	AAV	CamKIIa	aIC	aIC 558	1.95	Midbrain Reticular Nucleus	Midbrain	-3.1	7376	1.22244e+06	0.002	0.0306967	1.86916	NaN	NaN
1520	AAV	CamKIIa	aIC	aIC 558	1.95	Periaqueductal Gray	Midbrain	-3.1	380	1.84191e+06	5.16e-05	0.00158145	0.0482243	NaN	NaN
1521	AAV	CamKIIa	aIC	aIC 558	1.95	Ventral Tegmental Area	Midbrain	-3.1	38376	987570	0.01	0.15971	9.34579	NaN	NaN
1522	AAV	CamKIIa	aIC	aIC 558	1.95	Ventral Tegmental Area	Midbrain	-3.1	34200	858878	0.01	0.14233	9.34579	NaN	NaN
1523	AAV	CamKIIa	aIC	aIC 558	1.95	Substantia Nigra	Midbrain	-3.1	1304	976598	0.0003338	0.00542686	0.311963	NaN	NaN
1524	AAV	CamKIIa	aIC	aIC 558	1.95	Hypothalamic Lateral Zone	Hypothalamus	-3.1	50624	729032	0.017	0.210682	15.8879	NaN	NaN
1525	AAV	CamKIIa	aIC	aIC 558	1.95	Midbrain Reticular Nucleus	Midbrain	-3.1	26656	4.47044e+06	0.001	0.110934	0.934579	NaN	NaN
1526	AAV	CamKIIa	aIC	aIC 558	1.95	Posterior Complex of the Thalamus	Thalamus	-3.1	820	308383	0.0006648	0.0034126	0.621308	NaN	NaN
1527	AAV	CamKIIa	aIC	aIC 558	1.95	Ectorhinal Cortex	Association Cortex	-3.1	1000	1.60732e+06	0.0001555	0.0041617	0.145327	NaN	NaN
1528	AAV	CamKIIa	aIC	aIC 558	1.95	Perirhinal Cortex	Association Cortex	-3.1	184	846092	5.44e-05	0.000765753	0.0508411	NaN	NaN
1529	AAV	CamKIIa	aIC	aIC 558	1.95	Entorhinal Cortex	Association Cortex	-3.1	116	2.15176e+06	1.35e-05	0.000482758	0.0126168	NaN	NaN
1530	AAV	CamKIIa	aIC	aIC 558	1.95	Amygdalopiriform Transition Area	Amygdala	-3.1	52	765091	1.7e-05	0.000216409	0.0158879	NaN	NaN
1531	AAV	CamKIIa	aIC	aIC 558	1.95	Entorhinal Cortex	Association Cortex	-3.1	28	1.71355e+06	4.09e-06	0.000116528	0.00382243	NaN	NaN
1532	AAV	CamKIIa	aIC	aIC 558	1.95	Auditory Cortex, primary	Sensory Cortex	-3.1	288	7.82859e+06	9.2e-06	0.00119857	0.00859813	NaN	NaN
1533	AAV	CamKIIa	aIC	aIC 558	1.95	Ectorhinal Cortex	Association Cortex	-3.2	36	1.13946e+06	7.9e-06	0.000149821	0.00738318	NaN	NaN
1534	AAV	CamKIIa	aIC	aIC 558	1.95	Perirhinal Cortex	Association Cortex	-3.2	340	1.12687e+06	7.54e-05	0.00141498	0.0704673	NaN	NaN
1535	AAV	CamKIIa	aIC	aIC 558	1.95	Substantia Nigra	Midbrain	-3.2	86540	3.66626e+06	0.006	0.360154	5.60748	NaN	NaN
1536	AAV	CamKIIa	aIC	aIC 558	1.95	Substantia Nigra	Midbrain	-3.2	852	610121	0.0003491	0.00354577	0.326262	NaN	NaN
1537	AAV	CamKIIa	aIC	aIC 558	1.95	Midbrain Reticular Nucleus	Midbrain	-3.2	3000	1.36772e+06	0.0005484	0.0124851	0.512523	NaN	NaN
1538	AAV	CamKIIa	aIC	aIC 558	1.95	Ventral Tegmental Area	Midbrain	-3.2	9888	1.61225e+06	0.002	0.0411509	1.86916	NaN	NaN
1539	AAV	CamKIIa	aIC	aIC 558	1.95	Raphe Nuclei	Midbrain	-3.2	72	127463	0.0001412	0.000299643	0.131963	NaN	NaN
1540	AAV	CamKIIa	aIC	aIC 558	1.95	Ventral Tegmental Area	Midbrain	-3.2	400	284423	0.0003516	0.00166468	0.328598	NaN	NaN
1541	AAV	CamKIIa	aIC	aIC 558	1.95	Substantia Nigra	Midbrain	-3.2	416	285486	0.0003643	0.00173127	0.340467	NaN	NaN
1542	AAV	CamKIIa	aIC	aIC 558	1.95	Raphe Nuclei	Midbrain	-3.2	12484	362096	0.009	0.0519547	8.41121	NaN	NaN
1543	AAV	CamKIIa	aIC	aIC 558	1.95	Midbrain Reticular Nucleus	Midbrain	-3.2	257484	5.4806e+06	0.012	1.07157	11.215	NaN	NaN
1544	AAV	CamKIIa	aIC	aIC 558	1.95	Periaqueductal Gray	Midbrain	-3.2	308	1.68458e+06	4.57e-05	0.0012818	0.0427103	NaN	NaN
1545	AAV	CamKIIa	aIC	aIC 558	1.95	Ectorhinal Cortex	Association Cortex	-3.3	68	1.13946e+06	1.49e-05	0.000282996	0.0139252	NaN	NaN
1546	AAV	CamKIIa	aIC	aIC 558	1.95	Perirhinal Cortex	Association Cortex	-3.3	212	1.12687e+06	4.7e-05	0.000882281	0.0439252	NaN	NaN
1547	AAV	CamKIIa	aIC	aIC 558	1.95	Substantia Nigra	Midbrain	-3.3	157636	3.72019e+06	0.011	0.656034	10.2804	NaN	NaN
1548	AAV	CamKIIa	aIC	aIC 558	1.95	Substantia Nigra	Midbrain	-3.3	8980	610121	0.004	0.0373721	3.73832	NaN	NaN
1549	AAV	CamKIIa	aIC	aIC 558	1.95	Midbrain Reticular Nucleus	Midbrain	-3.3	6784	1.36772e+06	0.001	0.028233	0.934579	NaN	NaN
1550	AAV	CamKIIa	aIC	aIC 558	1.95	Ventral Tegmental Area	Midbrain	-3.3	61868	1.61225e+06	0.01	0.257476	9.34579	NaN	NaN
1551	AAV	CamKIIa	aIC	aIC 558	1.95	Raphe Nuclei	Midbrain	-3.3	272	127463	0.0005335	0.00113198	0.498598	NaN	NaN
1552	AAV	CamKIIa	aIC	aIC 558	1.95	Ventral Tegmental Area	Midbrain	-3.3	768	284423	0.0006751	0.00319619	0.630935	NaN	NaN
1553	AAV	CamKIIa	aIC	aIC 558	1.95	Substantia Nigra	Midbrain	-3.3	640	285486	0.0005604	0.00266349	0.523738	NaN	NaN
1554	AAV	CamKIIa	aIC	aIC 558	1.95	Raphe Nuclei	Midbrain	-3.3	6384	362096	0.004	0.0265683	3.73832	NaN	NaN
1555	AAV	CamKIIa	aIC	aIC 558	1.95	Midbrain Reticular Nucleus	Midbrain	-3.3	207692	5.5135e+06	0.009	0.864352	8.41121	NaN	NaN
1556	AAV	CamKIIa	aIC	aIC 558	1.95	Periaqueductal Gray	Midbrain	-3.3	256	1.68458e+06	3.8e-05	0.0010654	0.035514	NaN	NaN
1557	AAV	CamKIIa	aIC	aIC 558	1.95	Perirhinal Cortex	Association Cortex	-3.6	748	280326	0.0006671	0.00311295	0.623458	NaN	NaN
1558	AAV	CamKIIa	aIC	aIC 558	1.95	Ectorhinal Cortex	Association Cortex	-3.6	32	274514	2.91e-05	0.000133175	0.0271963	NaN	NaN
1559	AAV	CamKIIa	aIC	aIC 558	1.95	Auditory Cortex, primary	Sensory Cortex	-3.6	188	1.22501e+06	3.84e-05	0.0007824	0.0358879	NaN	NaN
1560	AAV	CamKIIa	aIC	aIC 558	1.95	Substantia Nigra	Midbrain	-3.6	60448	1.08469e+06	0.014	0.251567	13.0841	NaN	NaN
1561	AAV	CamKIIa	aIC	aIC 558	1.95	Ventral Tegmental Area	Midbrain	-3.6	1932	290812	0.002	0.00804041	1.86916	NaN	NaN
1562	AAV	CamKIIa	aIC	aIC 558	1.95	Periaqueductal Gray	Midbrain	-3.6	6132	1.16836e+06	0.001	0.0255196	0.934579	NaN	NaN
1563	AAV	CamKIIa	aIC	aIC 558	1.95	Ventral Tegmental Area	Midbrain	-3.6	148	58525.3	0.0006322	0.000615932	0.590841	NaN	NaN
1564	AAV	CamKIIa	aIC	aIC 558	1.95	Raphe Nuclei	Midbrain	-3.6	692	61495.1	0.003	0.0028799	2.80374	NaN	NaN
1565	AAV	CamKIIa	aIC	aIC 558	1.95	Substantia Nigra	Midbrain	-3.6	1088	228794	0.001	0.00452793	0.934579	NaN	NaN
1566	AAV	CamKIIa	aIC	aIC 558	1.95	Midbrain Reticular Nucleus	Midbrain	-3.6	7008	454573	0.004	0.0291652	3.73832	NaN	NaN
1567	AAV	CamKIIa	aIC	aIC 558	1.95	Midbrain Reticular Nucleus	Midbrain	-3.6	116024	1.26465e+06	0.023	0.482857	21.4953	NaN	NaN
1568	AAV	CamKIIa	aIC	aIC 558	1.95	Periaqueductal Gray	Midbrain	-3.6	15396	959852	0.004	0.0640736	3.73832	NaN	NaN
1569	AAV	CamKIIa	aIC	aIC 558	1.95	Superior Colliculus	Midbrain	-3.6	128	277860	0.0001152	0.000532698	0.107664	NaN	NaN
1570	AAV	CamKIIa	aIC	aIC 558	1.95	Superior Colliculus	Midbrain	-3.6	32	329089	2.43e-05	0.000133175	0.0227103	NaN	NaN
1571	AAV	CamKIIa	aIC	aIC 558	1.95	Substantia Nigra	Midbrain	-3.6	20	78434	6.38e-05	8.32341e-05	0.0596262	NaN	NaN
1572	AAV	CamKIIa	aIC	aIC 558	1.95	Periaqueductal Gray	Midbrain	-3.7	4232	1.39683e+06	0.0007574	0.0176123	0.70785	NaN	NaN
1573	AAV	CamKIIa	aIC	aIC 558	1.95	Periaqueductal Gray	Midbrain	-3.7	50660	1.18627e+06	0.011	0.210832	10.2804	NaN	NaN
1574	AAV	CamKIIa	aIC	aIC 558	1.95	Superior Colliculus	Midbrain	-3.7	2160	430319	0.001	0.00898928	0.934579	NaN	NaN
1575	AAV	CamKIIa	aIC	aIC 558	1.95	Superior Colliculus	Midbrain	-3.7	172	97132.8	0.0004427	0.000715813	0.413738	NaN	NaN
1576	AAV	CamKIIa	aIC	aIC 558	1.95	Substantia Nigra	Midbrain	-3.7	33276	815789	0.01	0.138485	9.34579	NaN	NaN
1577	AAV	CamKIIa	aIC	aIC 558	1.95	Periaqueductal Gray	Midbrain	-3.7	956	52769	0.005	0.00397859	4.6729	NaN	NaN
1578	AAV	CamKIIa	aIC	aIC 558	1.95	Substantia Nigra	Midbrain	-3.7	984	311307	0.0007902	0.00409512	0.738505	NaN	NaN
1579	AAV	CamKIIa	aIC	aIC 558	1.95	Midbrain Reticular Nucleus	Midbrain	-3.7	848	80863	0.003	0.00352912	2.80374	NaN	NaN
1580	AAV	CamKIIa	aIC	aIC 558	1.95	Midbrain Reticular Nucleus	Midbrain	-3.7	796	174449	0.001	0.00331272	0.934579	NaN	NaN
1581	AAV	CamKIIa	aIC	aIC 558	1.95	Midbrain Reticular Nucleus	Midbrain	-3.7	1336	142248	0.002	0.00556004	1.86916	NaN	NaN
1582	AAV	CamKIIa	aIC	aIC 558	1.95	Substantia Nigra	Midbrain	-3.7	1488	138646	0.003	0.00619261	2.80374	NaN	NaN
1583	AAV	CamKIIa	aIC	aIC 558	1.95	Ventral Tegmental Area	Midbrain	-3.7	2420	166098	0.004	0.0100713	3.73832	NaN	NaN
1584	AAV	CamKIIa	aIC	aIC 558	1.95	Ventral Tegmental Area	Midbrain	-3.7	1596	268932	0.001	0.00664208	0.934579	NaN	NaN
1585	AAV	CamKIIa	aIC	aIC 558	1.95	Midbrain Reticular Nucleus	Midbrain	-3.7	97040	1.01393e+06	0.024	0.403852	22.4299	NaN	NaN
1586	AAV	CamKIIa	aIC	aIC 558	1.95	Raphe Nuclei	Midbrain	-3.7	168	84712.8	0.0004958	0.000699166	0.463364	NaN	NaN
1587	AAV	CamKIIa	aIC	aIC 558	1.95	Periaqueductal Gray	Midbrain	-3.8	976	1.43956e+06	0.0001695	0.00406182	0.158411	NaN	NaN
1588	AAV	CamKIIa	aIC	aIC 558	1.95	Periaqueductal Gray	Midbrain	-3.8	21872	1.24067e+06	0.004	0.0910248	3.73832	NaN	NaN
1589	AAV	CamKIIa	aIC	aIC 558	1.95	Substantia Nigra	Midbrain	-3.8	15464	322435	0.012	0.0643566	11.215	NaN	NaN
1590	AAV	CamKIIa	aIC	aIC 558	1.95	Substantia Nigra	Midbrain	-3.8	5512	628801	0.002	0.0229393	1.86916	NaN	NaN
1591	AAV	CamKIIa	aIC	aIC 558	1.95	Ventral Tegmental Area	Midbrain	-3.8	1280	386670	0.0008276	0.00532698	0.773458	NaN	NaN
1592	AAV	CamKIIa	aIC	aIC 558	1.95	Ventral Tegmental Area	Midbrain	-3.8	7036	152752	0.012	0.0292817	11.215	NaN	NaN
1593	AAV	CamKIIa	aIC	aIC 558	1.95	Substantia Nigra	Midbrain	-3.8	540	138380	0.0009756	0.00224732	0.911776	NaN	NaN
1594	AAV	CamKIIa	aIC	aIC 558	1.95	Raphe Nuclei	Midbrain	-3.8	156	268245	0.0001454	0.000649226	0.135888	NaN	NaN
1595	AAV	CamKIIa	aIC	aIC 558	1.95	Substantia Nigra	Midbrain	-3.8	172	345643	0.0001244	0.000715813	0.116262	NaN	NaN
1596	AAV	CamKIIa	aIC	aIC 558	1.95	Midbrain Reticular Nucleus	Midbrain	-3.8	3900	239812	0.004	0.0162306	3.73832	NaN	NaN
1597	AAV	CamKIIa	aIC	aIC 558	1.95	Midbrain Reticular Nucleus	Midbrain	-3.8	604	345909	0.0004365	0.00251367	0.407944	NaN	NaN
1598	AAV	CamKIIa	aIC	aIC 558	1.95	Midbrain Reticular Nucleus	Midbrain	-3.8	19772	1.08415e+06	0.005	0.0822852	4.6729	NaN	NaN
1599	AAV	CamKIIa	aIC	aIC 558	1.95	Periaqueductal Gray	Midbrain	-4	3060	1.36089e+06	0.0005621	0.0127348	0.525327	NaN	NaN
1600	AAV	CamKIIa	aIC	aIC 558	1.95	Periaqueductal Gray	Midbrain	-4	13496	905460	0.004	0.0561663	3.73832	NaN	NaN
1601	AAV	CamKIIa	aIC	aIC 558	1.95	Substantia Nigra	Midbrain	-4	42704	361491	0.03	0.177721	28.0374	NaN	NaN
1602	AAV	CamKIIa	aIC	aIC 558	1.95	Superior Colliculus	Midbrain	-4	244	507947	0.0001201	0.00101546	0.112243	NaN	NaN
1603	AAV	CamKIIa	aIC	aIC 558	1.95	Substantia Nigra	Midbrain	-4	184	230022	0.0002	0.000765753	0.186916	NaN	NaN
1604	AAV	CamKIIa	aIC	aIC 558	1.95	Raphe Nuclei	Midbrain	-4	160	127601	0.0003135	0.000665873	0.292991	NaN	NaN
1605	AAV	CamKIIa	aIC	aIC 558	1.95	Raphe Nuclei	Midbrain	-4	712	170269	0.001	0.00296313	0.934579	NaN	NaN
1606	AAV	CamKIIa	aIC	aIC 558	1.95	Raphe Nuclei	Midbrain	-4	76	120983	0.000157	0.000316289	0.146729	NaN	NaN
1607	AAV	CamKIIa	aIC	aIC 558	1.95	Pedunculopontine Nucleus	Hindbrain	-4	4912	492978	0.002	0.0204423	1.86916	NaN	NaN
1608	AAV	CamKIIa	aIC	aIC 558	1.95	Midbrain Reticular Nucleus	Midbrain	-4	5208	338374	0.004	0.0216741	3.73832	NaN	NaN
1609	AAV	CamKIIa	aIC	aIC 558	1.95	Midbrain Reticular Nucleus	Midbrain	-4	20760	1.29608e+06	0.004	0.086397	3.73832	NaN	NaN
1610	AAV	CamKIIa	aIC	aIC 558	1.95	Pedunculopontine Nucleus	Hindbrain	-4	736	108929	0.002	0.00306301	1.86916	NaN	NaN
1611	AAV	CamKIIa	aIC	aIC 558	1.95	Raphe Nuclei	Midbrain	-4.1	136	99983.4	0.0003401	0.000565992	0.31785	NaN	NaN
1612	AAV	CamKIIa	aIC	aIC 558	1.95	Raphe Nuclei	Midbrain	-4.1	996	138582	0.002	0.00414506	1.86916	NaN	NaN
1613	AAV	CamKIIa	aIC	aIC 558	1.95	Periaqueductal Gray	Midbrain	-4.1	3788	1.7038e+06	0.0005558	0.0157645	0.519439	NaN	NaN
1614	AAV	CamKIIa	aIC	aIC 558	1.95	Periaqueductal Gray	Midbrain	-4.1	3700	863232	0.001	0.0153983	0.934579	NaN	NaN
1615	AAV	CamKIIa	aIC	aIC 558	1.95	Superior Colliculus	Midbrain	-4.1	284	447606	0.0001586	0.00118192	0.148224	NaN	NaN
1616	AAV	CamKIIa	aIC	aIC 558	1.95	Pedunculopontine Nucleus	Hindbrain	-4.1	5560	552237	0.003	0.0231391	2.80374	NaN	NaN
1617	AAV	CamKIIa	aIC	aIC 558	1.95	Inferior Colliculus	Midbrain	-4.1	304	283433	0.0002681	0.00126516	0.250561	NaN	NaN
1618	AAV	CamKIIa	aIC	aIC 558	1.95	Midbrain Reticular Nucleus	Midbrain	-4.1	3848	130360	0.007	0.0160142	6.54206	NaN	NaN
1619	AAV	CamKIIa	aIC	aIC 558	1.95	Pedunculopontine Nucleus	Hindbrain	-4.1	5224	780124	0.002	0.0217407	1.86916	NaN	NaN
1620	AAV	CamKIIa	aIC	aIC 558	1.95	Raphe Nuclei	Midbrain	-4.1	476	541339	0.0002198	0.00198097	0.205421	NaN	NaN
1621	AAV	CamKIIa	aIC	aIC 558	1.95	Pedunculopontine Nucleus	Hindbrain	-4.1	808	352875	0.0005724	0.00336266	0.534953	NaN	NaN
1622	AAV	CamKIIa	aIC	aIC 558	1.95	Midbrain Reticular Nucleus	Midbrain	-4.1	7388	690168	0.003	0.0307467	2.80374	NaN	NaN
1623	AAV	CamKIIa	aIC	aIC 558	1.95	Superior Colliculus	Midbrain	-4.1	64	447405	3.58e-05	0.000266349	0.0334579	NaN	NaN
1624	AAV	CamKIIa	aIC	aIC 558	1.95	Pedunculopontine Nucleus	Hindbrain	-4.1	19792	409861	0.012	0.0823684	11.215	NaN	NaN
1625	AAV	CamKIIa	aIC	aIC 558	1.95	Raphe Nuclei	Midbrain	-4.2	148	99983.4	0.0003701	0.000615932	0.345888	NaN	NaN
1626	AAV	CamKIIa	aIC	aIC 558	1.95	Raphe Nuclei	Midbrain	-4.2	284	81678.8	0.0008693	0.00118192	0.81243	NaN	NaN
1627	AAV	CamKIIa	aIC	aIC 558	1.95	Periaqueductal Gray	Midbrain	-4.2	924	1.49795e+06	0.0001542	0.00384541	0.144112	NaN	NaN
1628	AAV	CamKIIa	aIC	aIC 558	1.95	Periaqueductal Gray	Midbrain	-4.2	1628	826339	0.0004925	0.00677525	0.46028	NaN	NaN
1629	AAV	CamKIIa	aIC	aIC 558	1.95	Superior Colliculus	Midbrain	-4.2	128	541403	5.91e-05	0.000532698	0.0552336	NaN	NaN
1630	AAV	CamKIIa	aIC	aIC 558	1.95	Pedunculopontine Nucleus	Hindbrain	-4.2	1236	587242	0.0005262	0.00514387	0.491776	NaN	NaN
1631	AAV	CamKIIa	aIC	aIC 558	1.95	Midbrain Reticular Nucleus	Midbrain	-4.2	3736	69992.1	0.013	0.0155481	12.1495	NaN	NaN
1632	AAV	CamKIIa	aIC	aIC 558	1.95	Pedunculopontine Nucleus	Hindbrain	-4.2	3388	1.16481e+06	0.0007272	0.0140999	0.679626	NaN	NaN
1633	AAV	CamKIIa	aIC	aIC 558	1.95	Raphe Nuclei	Midbrain	-4.2	1372	641294	0.0005349	0.00570986	0.499907	NaN	NaN
1634	AAV	CamKIIa	aIC	aIC 558	1.95	Superior Colliculus	Midbrain	-4.2	28	447405	1.57e-05	0.000116528	0.0146729	NaN	NaN
1635	AAV	CamKIIa	aIC	aIC 558	1.95	Pedunculopontine Nucleus	Hindbrain	-4.2	1568	335973	0.001	0.00652555	0.934579	NaN	NaN
1636	AAV	CamKIIa	aIC	aIC 558	1.95	Pedunculopontine Nucleus	Hindbrain	-4.2	36	64336.6	0.0001399	0.000149821	0.130748	NaN	NaN
1637	AAV	CamKIIa	aIC	aIC 558	1.95	Midbrain Reticular Nucleus	Midbrain	-4.2	6900	763918	0.002	0.0287158	1.86916	NaN	NaN
1638	AAV	CamKIIa	aIC	aIC 558	1.95	Pedunculopontine Nucleus	Hindbrain	-4.2	632	179765	0.0008789	0.0026302	0.821402	NaN	NaN
1639	AAV	CamKIIa	aIC	aIC 558	1.95	Periaqueductal Gray	Midbrain	-4.4	1392	1.63673e+06	0.0002126	0.00579309	0.198692	NaN	NaN
1640	AAV	CamKIIa	aIC	aIC 558	1.95	Pedunculopontine Nucleus	Hindbrain	-4.4	3192	348622	0.002	0.0132842	1.86916	NaN	NaN
1641	AAV	CamKIIa	aIC	aIC 558	1.95	Raphe Nuclei	Midbrain	-4.4	2016	275779	0.002	0.00838999	1.86916	NaN	NaN
1642	AAV	CamKIIa	aIC	aIC 558	1.95	Raphe Nuclei	Midbrain	-4.4	1516	537947	0.0007045	0.00630914	0.658411	NaN	NaN
1643	AAV	CamKIIa	aIC	aIC 558	1.95	Ventral Tegmental Area	Midbrain	-4.4	1048	53520.6	0.005	0.00436146	4.6729	NaN	NaN
1644	AAV	CamKIIa	aIC	aIC 558	1.95	Midbrain Reticular Nucleus	Midbrain	-4.4	10452	451731	0.006	0.0434981	5.60748	NaN	NaN
1645	AAV	CamKIIa	aIC	aIC 558	1.95	Pedunculopontine Nucleus	Hindbrain	-4.4	816	212708	0.0009591	0.00339595	0.896355	NaN	NaN
1646	AAV	CamKIIa	aIC	aIC 558	1.95	Pedunculopontine Nucleus	Hindbrain	-4.4	1112	226603	0.001	0.00462781	0.934579	NaN	NaN
1647	AAV	CamKIIa	aIC	aIC 558	1.95	Inferior Colliculus	Midbrain	-4.4	604	258859	0.0005833	0.00251367	0.54514	NaN	NaN
1648	AAV	CamKIIa	aIC	aIC 558	1.95	Pedunculopontine Nucleus	Hindbrain	-4.4	5800	1.25424e+06	0.001	0.0241379	0.934579	NaN	NaN
1649	AAV	CamKIIa	aIC	aIC 558	1.95	Superior Colliculus	Midbrain	-4.4	136	524647	6.48e-05	0.000565992	0.0605607	NaN	NaN
1650	AAV	CamKIIa	aIC	aIC 558	1.95	Periaqueductal Gray	Midbrain	-4.4	416	451988	0.0002301	0.00173127	0.215047	NaN	NaN
1651	AAV	CamKIIa	aIC	aIC 558	1.95	Periaqueductal Gray	Midbrain	-4.5	412	1.63673e+06	6.29e-05	0.00171462	0.058785	NaN	NaN
1652	AAV	CamKIIa	aIC	aIC 558	1.95	Pedunculopontine Nucleus	Hindbrain	-4.5	1468	348622	0.001	0.00610938	0.934579	NaN	NaN
1653	AAV	CamKIIa	aIC	aIC 558	1.95	Raphe Nuclei	Midbrain	-4.5	2676	332985	0.002	0.0111367	1.86916	NaN	NaN
1654	AAV	CamKIIa	aIC	aIC 558	1.95	Raphe Nuclei	Midbrain	-4.5	6004	537947	0.003	0.0249869	2.80374	NaN	NaN
1655	AAV	CamKIIa	aIC	aIC 558	1.95	Ventral Tegmental Area	Midbrain	-4.5	2676	53520.6	0.012	0.0111367	11.215	NaN	NaN
1656	AAV	CamKIIa	aIC	aIC 558	1.95	Midbrain Reticular Nucleus	Midbrain	-4.5	13488	451731	0.007	0.0561331	6.54206	NaN	NaN
1657	AAV	CamKIIa	aIC	aIC 558	1.95	Pedunculopontine Nucleus	Hindbrain	-4.5	1380	212708	0.002	0.00574315	1.86916	NaN	NaN
1658	AAV	CamKIIa	aIC	aIC 558	1.95	Pedunculopontine Nucleus	Hindbrain	-4.5	156	226603	0.0001721	0.000649226	0.160841	NaN	NaN
1659	AAV	CamKIIa	aIC	aIC 558	1.95	Inferior Colliculus	Midbrain	-4.5	152	258859	0.0001468	0.000632579	0.137196	NaN	NaN
1660	AAV	CamKIIa	aIC	aIC 558	1.95	Pedunculopontine Nucleus	Hindbrain	-4.5	4124	1.52455e+06	0.0006763	0.0171629	0.632056	NaN	NaN
1661	AAV	CamKIIa	aIC	aIC 558	1.95	Superior Colliculus	Midbrain	-4.5	40	470998	2.12e-05	0.000166468	0.0198131	NaN	NaN
1662	AAV	CamKIIa	aIC	aIC 558	1.95	Periaqueductal Gray	Midbrain	-4.5	316	360501	0.0002191	0.0013151	0.204766	NaN	NaN
1663	AAV	CamKIIa	aIC	aIC 558	1.95	Superior Colliculus	Midbrain	-4.5	72	393224	4.58e-05	0.000299643	0.0428037	NaN	NaN
1664	AAV	CamKIIa	aIC	aIC 558	1.95	Pedunculopontine Nucleus	Hindbrain	-4.7	4080	316852	0.003	0.0169797	2.80374	NaN	NaN
1665	AAV	CamKIIa	aIC	aIC 558	1.95	Pedunculopontine Nucleus	Hindbrain	-4.7	5420	1.50902e+06	0.0008979	0.0225564	0.839159	NaN	NaN
1666	AAV	CamKIIa	aIC	aIC 558	1.95	Raphe Nuclei	Midbrain	-4.7	364	261471	0.000348	0.00151486	0.325234	NaN	NaN
1667	AAV	CamKIIa	aIC	aIC 558	1.95	Raphe Nuclei	Midbrain	-4.7	3144	545014	0.001	0.0130844	0.934579	NaN	NaN
1668	AAV	CamKIIa	aIC	aIC 558	1.95	Periaqueductal Gray	Midbrain	-4.7	216	1.09667e+06	4.92e-05	0.000898928	0.0459813	NaN	NaN
1669	AAV	CamKIIa	aIC	aIC 558	1.95	Pedunculopontine Nucleus	Hindbrain	-4.7	3288	369979	0.002	0.0136837	1.86916	NaN	NaN
1670	AAV	CamKIIa	aIC	aIC 558	1.95	Midbrain Reticular Nucleus	Midbrain	-4.7	2368	448074	0.001	0.00985491	0.934579	NaN	NaN
1671	AAV	CamKIIa	aIC	aIC 558	1.95	Pedunculopontine Nucleus	Hindbrain	-4.7	56	409576	3.42e-05	0.000233055	0.0319626	NaN	NaN
1672	AAV	CamKIIa	aIC	aIC 558	1.95	Inferior Colliculus	Midbrain	-4.7	64	721974	2.22e-05	0.000266349	0.0207477	NaN	NaN
1673	AAV	CamKIIa	aIC	aIC 558	1.95	Hippocampus (CA1,CA2,CA3)	Hippocampus	-4.7	1160	770508	0.0003764	0.00482758	0.351776	NaN	NaN
1674	AAV	CamKIIa	aIC	aIC 558	1.95	Superior Colliculus	Midbrain	-4.7	32	215457	3.71e-05	0.000133175	0.0346729	NaN	NaN
1675	AAV	CamKIIa	aIC	aIC 558	1.95	Periaqueductal Gray	Midbrain	-4.7	28	274624	2.55e-05	0.000116528	0.0238318	NaN	NaN
1676	AAV	CamKIIa	aIC	aIC 558	1.95	Raphe Nuclei	Midbrain	-4.8	2308	548406	0.001	0.00960521	0.934579	NaN	NaN
1677	AAV	CamKIIa	aIC	aIC 558	1.95	Periaqueductal Gray	Midbrain	-4.8	348	1.66102e+06	5.24e-05	0.00144827	0.048972	NaN	NaN
1678	AAV	CamKIIa	aIC	aIC 558	1.95	Midbrain Reticular Nucleus	Midbrain	-4.8	2512	365396	0.002	0.0104542	1.86916	NaN	NaN
1679	AAV	CamKIIa	aIC	aIC 558	1.95	Pedunculopontine Nucleus	Hindbrain	-4.8	76	113907	0.0001668	0.000316289	0.155888	NaN	NaN
1680	AAV	CamKIIa	aIC	aIC 558	1.95	Posterior Complex of the Thalamus	Thalamus	-4.8	280	121029	0.0005784	0.00116528	0.540561	NaN	NaN
1681	AAV	CamKIIa	aIC	aIC 558	1.95	Pedunculopontine Nucleus	Hindbrain	-4.8	204	224385	0.0002273	0.000848987	0.21243	NaN	NaN
1682	AAV	CamKIIa	aIC	aIC 558	1.95	Pedunculopontine Nucleus	Hindbrain	-4.8	2972	933784	0.0007957	0.0123686	0.743645	NaN	NaN
1683	AAV	CamKIIa	aIC	aIC 558	1.95	Pedunculopontine Nucleus	Hindbrain	-4.8	5012	110002	0.011	0.0208585	10.2804	NaN	NaN
1684	AAV	CamKIIa	aIC	aIC 558	1.95	Pedunculopontine Nucleus	Hindbrain	-4.8	208	178784	0.0002909	0.000865634	0.271869	NaN	NaN
1685	AAV	CamKIIa	aIC	aIC 558	1.95	Raphe Nuclei	Midbrain	-4.8	360	252204	0.0003569	0.00149821	0.333551	NaN	NaN
1686	AAV	CamKIIa	aIC	aIC 558	1.95	Hippocampus (CA1,CA2,CA3)	Hippocampus	-4.8	1328	684402	0.0004851	0.00552674	0.453364	NaN	NaN
1687	AAV	CamKIIa	aIC	aIC 558	1.95	Pedunculopontine Nucleus	Hindbrain	-4.8	388	265083	0.0003659	0.00161474	0.341963	NaN	NaN
1688	AAV	CamKIIa	aIC	aIC 558	1.95	Raphe Nuclei	Midbrain	-4.9	160	684522	5.84e-05	0.000665873	0.0545794	NaN	NaN
1689	AAV	CamKIIa	aIC	aIC 558	1.95	Periaqueductal Gray	Midbrain	-4.9	568	2.1893e+06	6.49e-05	0.00236385	0.0606542	NaN	NaN
1690	AAV	CamKIIa	aIC	aIC 558	1.95	Midbrain Reticular Nucleus	Midbrain	-4.9	3424	299107	0.003	0.0142497	2.80374	NaN	NaN
1691	AAV	CamKIIa	aIC	aIC 558	1.95	Pedunculopontine Nucleus	Hindbrain	-4.9	40	207217	4.83e-05	0.000166468	0.0451402	NaN	NaN
1692	AAV	CamKIIa	aIC	aIC 558	1.95	Pedunculopontine Nucleus	Hindbrain	-4.9	4580	1.63904e+06	0.0006986	0.0190606	0.652897	NaN	NaN
1693	AAV	CamKIIa	aIC	aIC 558	1.95	Pedunculopontine Nucleus	Hindbrain	-4.9	12596	114842	0.027	0.0524208	25.2336	NaN	NaN
1694	AAV	CamKIIa	aIC	aIC 558	1.95	Raphe Nuclei	Midbrain	-4.9	396	368705	0.0002685	0.00164803	0.250935	NaN	NaN
1695	AAV	CamKIIa	aIC	aIC 558	1.95	Pedunculopontine Nucleus	Hindbrain	-4.9	144	214788	0.0001676	0.000599285	0.156636	NaN	NaN
1696	AAV	CamKIIa	aIC	aIC 558	1.95	Hippocampus (CA1,CA2,CA3)	Hippocampus	-4.9	3704	995984	0.0009297	0.0154149	0.868879	NaN	NaN
1697	AAV	CamKIIa	aIC	aIC 558	1.95	Pedunculopontine Nucleus	Hindbrain	-4.9	3172	326596	0.002	0.0132009	1.86916	NaN	NaN
1698	AAV	CamKIIa	aIC	aIC 558	1.95	Parabrachial Nucleus	Hindbrain	-5	12204	935333	0.003	0.0507894	2.80374	NaN	NaN
1699	AAV	CamKIIa	aIC	aIC 558	1.95	Hippocampus (CA1,CA2,CA3)	Hippocampus	-5	6228	720333	0.002	0.0259191	1.86916	NaN	NaN
1700	AAV	CamKIIa	aIC	aIC 558	1.95	Pedunculopontine Nucleus	Hindbrain	-5	1524	169700	0.002	0.00634244	1.86916	NaN	NaN
1701	AAV	CamKIIa	aIC	aIC 558	1.95	Pedunculopontine Nucleus	Hindbrain	-5	8244	112513	0.018	0.0343091	16.8224	NaN	NaN
1702	AAV	CamKIIa	aIC	aIC 558	1.95	Raphe Nuclei	Midbrain	-5	3276	348503	0.002	0.0136337	1.86916	NaN	NaN
1703	AAV	CamKIIa	aIC	aIC 558	1.95	Pedunculopontine Nucleus	Hindbrain	-5	116	87297.6	0.0003322	0.000482758	0.310467	NaN	NaN
1704	AAV	CamKIIa	aIC	aIC 558	1.95	Pedunculopontine Nucleus	Hindbrain	-5	6812	1.81035e+06	0.0009407	0.0283495	0.879159	NaN	NaN
1705	AAV	CamKIIa	aIC	aIC 558	1.95	Pedunculopontine Nucleus	Hindbrain	-5	260	262406	0.0002477	0.00108204	0.231495	NaN	NaN
1706	AAV	CamKIIa	aIC	aIC 558	1.95	Pedunculopontine Nucleus	Hindbrain	-5	56	584547	2.4e-05	0.000233055	0.0224299	NaN	NaN
1707	AAV	CamKIIa	aIC	aIC 558	1.95	Periaqueductal Gray	Midbrain	-5.3	6188	926442	0.002	0.0257526	1.86916	NaN	NaN
1708	AAV	CamKIIa	aIC	aIC 558	1.95	Posterior Complex of the Thalamus	Thalamus	-5.3	1976	633842	0.0007794	0.00822353	0.728411	NaN	NaN
1709	AAV	CamKIIa	aIC	aIC 558	1.95	Parabrachial Nucleus	Hindbrain	-5.3	36352	594795	0.015	0.151286	14.0187	NaN	NaN
1710	AAV	CamKIIa	aIC	aIC 558	1.95	Pedunculopontine Nucleus	Hindbrain	-5.3	1864	203212	0.002	0.00775741	1.86916	NaN	NaN
1711	AAV	CamKIIa	aIC	aIC 558	1.95	Hippocampus (CA1,CA2,CA3)	Hippocampus	-5.3	4456	638948	0.002	0.0185445	1.86916	NaN	NaN
1712	AAV	CamKIIa	aIC	aIC 558	1.95	Raphe Nuclei	Midbrain	-5.3	1652	245339	0.002	0.00687513	1.86916	NaN	NaN
1713	AAV	CamKIIa	aIC	aIC 558	1.95	Pedunculopontine Nucleus	Hindbrain	-5.3	1884	201177	0.002	0.00784065	1.86916	NaN	NaN
1714	AAV	CamKIIa	aIC	aIC 558	1.95	Pedunculopontine Nucleus	Hindbrain	-5.3	4712	1.22207e+06	0.0009639	0.0196099	0.900841	NaN	NaN
1715	AAV	CamKIIa	aIC	aIC 558	1.95	Pedunculopontine Nucleus	Hindbrain	-5.3	5684	509202	0.003	0.0236551	2.80374	NaN	NaN
1716	AAV	CamKIIa	aIC	aIC 558	1.95	Pedunculopontine Nucleus	Hindbrain	-5.3	72	358118	5.03e-05	0.000299643	0.0470093	NaN	NaN
1717	AAV	CamKIIa	aIC	aIC 558	1.95	Pedunculopontine Nucleus	Hindbrain	-5.3	848	790995	0.000268	0.00352912	0.250467	NaN	NaN
1718	AAV	CamKIIa	aIC	aIC 558	1.95	Parabrachial Nucleus	Hindbrain	-5.4	15508	747685	0.005	0.0645397	4.6729	NaN	NaN
1719	AAV	CamKIIa	aIC	aIC 558	1.95	Pedunculopontine Nucleus	Hindbrain	-5.4	18392	201177	0.023	0.076542	21.4953	NaN	NaN
1720	AAV	CamKIIa	aIC	aIC 558	1.95	Pedunculopontine Nucleus	Hindbrain	-5.4	5256	1.30797e+06	0.001	0.0218739	0.934579	NaN	NaN
1721	AAV	CamKIIa	aIC	aIC 558	1.95	Pedunculopontine Nucleus	Hindbrain	-5.4	164	501814	8.17e-05	0.000682519	0.0763551	NaN	NaN
1722	AAV	CamKIIa	aIC	aIC 558	1.95	Pedunculopontine Nucleus	Hindbrain	-5.4	172	452694	9.5e-05	0.000715813	0.088785	NaN	NaN
1723	AAV	CamKIIa	aIC	aIC 558	1.95	Posterior Complex of the Thalamus	Thalamus	-5.4	244	396093	0.000154	0.00101546	0.143925	NaN	NaN
1724	AAV	CamKIIa	aIC	aIC 558	1.95	Hippocampus (CA1,CA2,CA3)	Hippocampus	-5.4	1432	538800	0.0006644	0.00595956	0.620935	NaN	NaN
1725	AAV	CamKIIa	aIC	aIC 558	1.95	Medulla	Hindbrain	-5.4	2484	743909	0.0008348	0.0103377	0.780187	NaN	NaN
1726	AAV	CamKIIa	aIC	aIC 558	1.95	Parabrachial Nucleus	Hindbrain	-5.5	7684	469981	0.004	0.0319785	3.73832	NaN	NaN
1727	AAV	CamKIIa	aIC	aIC 558	1.95	Pedunculopontine Nucleus	Hindbrain	-5.5	192	224935	0.0002134	0.000799047	0.199439	NaN	NaN
1728	AAV	CamKIIa	aIC	aIC 558	1.95	Raphe Nuclei	Midbrain	-5.5	6972	207895	0.008	0.0290154	7.47664	NaN	NaN
1729	AAV	CamKIIa	aIC	aIC 558	1.95	Pedunculopontine Nucleus	Hindbrain	-5.5	6280	320061	0.005	0.0261355	4.6729	NaN	NaN
1730	AAV	CamKIIa	aIC	aIC 558	1.95	Medulla	Hindbrain	-5.5	2716	462831	0.001	0.0113032	0.934579	NaN	NaN
1731	AAV	CamKIIa	aIC	aIC 558	1.95	Medulla	Hindbrain	-5.5	2192	734018	0.0007466	0.00912245	0.697757	NaN	NaN
1732	AAV	CamKIIa	aIC	aIC 558	1.95	Pedunculopontine Nucleus	Hindbrain	-5.5	356	459321	0.0001938	0.00148157	0.181121	NaN	NaN
1733	AAV	CamKIIa	aIC	aIC 558	1.95	Medulla	Hindbrain	-5.5	80	360831	5.54e-05	0.000332936	0.0517757	NaN	NaN
1734	AAV	CamKIIa	aIC	aIC 558	1.95	Posterior Complex of the Thalamus	Thalamus	-5.5	84	610579	3.44e-05	0.000349583	0.0321495	NaN	NaN
1735	AAV	CamKIIa	aIC	aIC 558	1.95	Pedunculopontine Nucleus	Hindbrain	-5.5	2652	794258	0.0008347	0.0110368	0.780093	NaN	NaN
1736	AAV	CamKIIa	aIC	aIC 558	1.95	Medulla	Hindbrain	-5.5	696	99360.1	0.002	0.00289655	1.86916	NaN	NaN
1737	AAV	CamKIIa	aIC	aIC 558	1.95	Pedunculopontine Nucleus	Hindbrain	-5.7	1032	414150	0.000623	0.00429488	0.582243	NaN	NaN
1738	AAV	CamKIIa	aIC	aIC 558	1.95	Medulla	Hindbrain	-5.7	3556	385185	0.002	0.014799	1.86916	NaN	NaN
1739	AAV	CamKIIa	aIC	aIC 558	1.95	Medulla	Hindbrain	-5.7	2124	77453.2	0.007	0.00883946	6.54206	NaN	NaN
1740	AAV	CamKIIa	aIC	aIC 558	1.95	Raphe Nuclei	Midbrain	-5.7	7884	77966.5	0.025	0.0328109	23.3645	NaN	NaN
1741	AAV	CamKIIa	aIC	aIC 558	1.95	Pedunculopontine Nucleus	Hindbrain	-5.7	6432	115832	0.014	0.0267681	13.0841	NaN	NaN
1742	AAV	CamKIIa	aIC	aIC 558	1.95	Medulla	Hindbrain	-5.7	508	516957	0.0002457	0.00211415	0.229626	NaN	NaN
1743	AAV	CamKIIa	aIC	aIC 558	1.95	Medulla	Hindbrain	-5.7	2680	312645	0.002	0.0111534	1.86916	NaN	NaN
1744	AAV	CamKIIa	aIC	aIC 558	1.95	Pedunculopontine Nucleus	Hindbrain	-5.7	10556	847146	0.003	0.0439309	2.80374	NaN	NaN
1745	AAV	CamKIIa	aIC	aIC 558	1.95	Posterior Complex of the Thalamus	Thalamus	-5.7	108	202927	0.0001331	0.000449464	0.124393	NaN	NaN
1746	AAV	CamKIIa	aIC	aIC 558	1.95	Medulla	Hindbrain	-6	96	354268	6.78e-05	0.000399524	0.0633645	NaN	NaN
1747	AAV	CamKIIa	aIC	aIC 558	1.95	Medulla	Hindbrain	-6	4992	370382	0.003	0.0207752	2.80374	NaN	NaN
1748	AAV	CamKIIa	aIC	aIC 558	1.95	Medulla	Hindbrain	-6	2136	240948	0.002	0.0088894	1.86916	NaN	NaN
1749	AAV	CamKIIa	aIC	aIC 558	1.95	Medulla	Hindbrain	-6	704	125813	0.001	0.00292984	0.934579	NaN	NaN
1750	AAV	CamKIIa	aIC	aIC 558	1.95	Midbrain Reticular Nucleus	Midbrain	-6	1872	382032	0.001	0.00779071	0.934579	NaN	NaN
1751	AAV	CamKIIa	aIC	aIC 558	1.95	Raphe Nuclei	Midbrain	-6	3548	79891.4	0.011	0.0147657	10.2804	NaN	NaN
1752	AAV	CamKIIa	aIC	aIC 558	1.95	Pedunculopontine Nucleus	Hindbrain	-6	4016	90469	0.011	0.0167134	10.2804	NaN	NaN
1753	AAV	CamKIIa	aIC	aIC 558	1.95	Pedunculopontine Nucleus	Hindbrain	-6	10068	1.00574e+06	0.003	0.0419	2.80374	NaN	NaN
1754	AAV	CamKIIa	aIC	aIC 558	1.95	Medulla	Hindbrain	-5.9	2276	378870	0.002	0.00947204	1.86916	NaN	NaN
1755	AAV	CamKIIa	aIC	aIC 558	1.95	Medulla	Hindbrain	-5.9	1264	113054	0.003	0.00526039	2.80374	NaN	NaN
1756	AAV	CamKIIa	aIC	aIC 558	1.95	Raphe Nuclei	Midbrain	-5.9	7000	88342.5	0.02	0.0291319	18.6916	NaN	NaN
1757	AAV	CamKIIa	aIC	aIC 558	1.95	Pedunculopontine Nucleus	Hindbrain	-5.9	4044	115832	0.009	0.0168299	8.41121	NaN	NaN
1758	AAV	CamKIIa	aIC	aIC 558	1.95	Medulla	Hindbrain	-5.9	104	465187	5.59e-05	0.000432817	0.052243	NaN	NaN
1759	AAV	CamKIIa	aIC	aIC 558	1.95	Medulla	Hindbrain	-5.9	2508	612036	0.001	0.0104376	0.934579	NaN	NaN
1760	AAV	CamKIIa	aIC	aIC 558	1.95	Pedunculopontine Nucleus	Hindbrain	-5.9	5808	818319	0.002	0.0241712	1.86916	NaN	NaN
1761	AAV	CamKIIa	aIC	aIC 558	1.95	Posterior Complex of the Thalamus	Thalamus	-5.9	44	202927	5.42e-05	0.000183115	0.0506542	NaN	NaN
1762	AAV	CamKIIa	aIC	aIC 558	1.95	Medulla	Hindbrain	-6.2	240	354268	0.0001694	0.000998809	0.158318	NaN	NaN
1763	AAV	CamKIIa	aIC	aIC 558	1.95	Medulla	Hindbrain	-6.2	4832	291747	0.004	0.0201093	3.73832	NaN	NaN
1764	AAV	CamKIIa	aIC	aIC 558	1.95	Medulla	Hindbrain	-6.2	4224	244001	0.004	0.017579	3.73832	NaN	NaN
1765	AAV	CamKIIa	aIC	aIC 558	1.95	Medulla	Hindbrain	-6.2	596	125813	0.001	0.00248038	0.934579	NaN	NaN
1766	AAV	CamKIIa	aIC	aIC 558	1.95	Midbrain Reticular Nucleus	Midbrain	-6.2	6332	438963	0.004	0.0263519	3.73832	NaN	NaN
1767	AAV	CamKIIa	aIC	aIC 558	1.95	Raphe Nuclei	Midbrain	-6.2	3208	79891.4	0.01	0.0133507	9.34579	NaN	NaN
1768	AAV	CamKIIa	aIC	aIC 558	1.95	Pedunculopontine Nucleus	Hindbrain	-6.2	2524	90469	0.007	0.0105041	6.54206	NaN	NaN
1769	AAV	CamKIIa	aIC	aIC 558	1.95	Pedunculopontine Nucleus	Hindbrain	-6.2	9264	988716	0.002	0.038554	1.86916	NaN	NaN
1770	AAV	CamKIIa	aIC	aIC 558	1.95	Agranular Insular Cortex, posterior	Insular Cortex	0.1	2060	339190	0.002	0.00857311	1.86916	NaN	NaN
1771	AAV	CamKIIa	aIC	aIC 558	1.95	Motor Cortex, secondary	Motor Cortex	0.1	1056	721736	0.0003658	0.00439476	0.341869	NaN	NaN
1772	AAV	CamKIIa	aIC	aIC 558	1.95	Dysgranular Insular Cortex	Insular Cortex	0.1	4556	321206	0.004	0.0189607	3.73832	NaN	NaN
1773	AAV	CamKIIa	aIC	aIC 558	1.95	Granular Insular Cortex	Insular Cortex	0.1	50972	377385	0.034	0.21213	31.7757	NaN	NaN
1774	AAV	CamKIIa	aIC	aIC 558	1.95	Somatosensory Cortex, secondary	Sensory Cortex	0.1	101836	1.18648e+06	0.021	0.423811	19.6262	NaN	NaN
1775	AAV	CamKIIa	aIC	aIC 558	1.95	Somatosensory Cortex, primary	Sensory Cortex	0.1	55736	3.92409e+06	0.004	0.231957	3.73832	NaN	NaN
1776	AAV	CamKIIa	aIC	aIC 558	1.95	Piriform Area	Piriform Cortex	0.1	108	1.60626e+06	1.68e-05	0.000449464	0.0157009	NaN	NaN
1777	AAV	CamKIIa	aIC	aIC 558	1.95	Endopiriform Nucleus	Olfactory areas	0.1	1464	269143	0.001	0.00609273	0.934579	NaN	NaN
1778	AAV	CamKIIa	aIC	aIC 558	1.95	Medial Prefrontal Cortex	Prefrontal Cortex	0.1	92	372545	6.17e-05	0.000382877	0.0576636	NaN	NaN
1779	AAV	CamKIIa	aIC	aIC 558	1.95	Cingulate Cortex	Prefrontal Cortex	0.1	288	362234	0.0001988	0.00119857	0.185794	NaN	NaN
1780	AAV	CamKIIa	aIC	aIC 558	1.95	Claustrum	Claustrum	0.1	820	116180	0.002	0.0034126	1.86916	NaN	NaN
1781	AAV	CamKIIa	aIC	aIC 558	1.95	Caudate Putamen	Striatum	0.1	563540	5.19248e+06	0.027	2.34529	25.2336	NaN	NaN
1782	AAV	CamKIIa	aIC	aIC 558	1.95	Basal Forebrain	Basal Forebrain	0.1	0	127491	0	0	0	NaN	NaN
1783	AAV	CamKIIa	aIC	aIC 558	1.95	Fundus of Striatum (IPAC)	Striatum	0.1	1164	212167	0.001	0.00484422	0.934579	NaN	NaN
1784	AAV	CamKIIa	aIC	aIC 558	1.95	Olfactory Tubercle	Striatum	0.1	52	463216	2.81e-05	0.000216409	0.0262617	NaN	NaN
1785	AAV	CamKIIa	aIC	aIC 558	1.95	Basal Forebrain	Basal Forebrain	0.1	136	429329	7.92e-05	0.000565992	0.0740187	NaN	NaN
1786	AAV	CamKIIa	aIC	aIC 558	1.95	Anterior Amygdaloid Area	Amygdala	0.1	24	110543	5.43e-05	9.98809e-05	0.0507477	NaN	NaN
1787	AAV	CamKIIa	aIC	aIC 558	1.95	Hypothalamic Lateral Zone	Hypothalamus	0.1	28	551870	1.27e-05	0.000116528	0.0118692	NaN	NaN
1788	AAV	CamKIIa	aIC	aIC 558	1.95	Ventral Pallidum	Pallidum	0.1	504	619855	0.0002033	0.0020975	0.19	NaN	NaN
1789	AAV	CamKIIa	aIC	aIC 558	1.95	Motor Cortex, primary	Motor Cortex	0.1	5552	673458	0.002	0.0231058	1.86916	NaN	NaN
1790	AAV	CamKIIa	aIC	aIC 558	1.95	Bed Nuclei of the Stria Terminalis (BNST)	Pallidum	0.1	140	460311	7.6e-05	0.000582638	0.071028	NaN	NaN
1791	AAV	CamKIIa	aIC	aIC 558	1.95	Agranular Insular Cortex, posterior	Insular Cortex	0.2	3720	430438	0.002	0.0154815	1.86916	NaN	NaN
1792	AAV	CamKIIa	aIC	aIC 558	1.95	Motor Cortex, primary	Motor Cortex	0.2	1220	910951	0.0003348	0.00507728	0.312897	NaN	NaN
1793	AAV	CamKIIa	aIC	aIC 558	1.95	Motor Cortex, secondary	Motor Cortex	0.2	444	601138	0.0001846	0.0018478	0.172523	NaN	NaN
1794	AAV	CamKIIa	aIC	aIC 558	1.95	Dysgranular Insular Cortex	Insular Cortex	0.2	16228	407047	0.01	0.0675361	9.34579	NaN	NaN
1795	AAV	CamKIIa	aIC	aIC 558	1.95	Granular Insular Cortex	Insular Cortex	0.2	43200	493547	0.022	0.179786	20.5607	NaN	NaN
1796	AAV	CamKIIa	aIC	aIC 558	1.95	Somatosensory Cortex, secondary	Sensory Cortex	0.2	37060	1.11422e+06	0.008	0.154233	7.47664	NaN	NaN
1797	AAV	CamKIIa	aIC	aIC 558	1.95	Somatosensory Cortex, primary	Sensory Cortex	0.2	18492	3.54855e+06	0.001	0.0769582	0.934579	NaN	NaN
1798	AAV	CamKIIa	aIC	aIC 558	1.95	Piriform Area	Piriform Cortex	0.2	152	1.46193e+06	2.6e-05	0.000632579	0.0242991	NaN	NaN
1799	AAV	CamKIIa	aIC	aIC 558	1.95	Endopiriform Nucleus	Olfactory areas	0.2	1888	355194	0.001	0.0078573	0.934579	NaN	NaN
1800	AAV	CamKIIa	aIC	aIC 558	1.95	Medial Prefrontal Cortex	Prefrontal Cortex	0.2	20	385790	1.3e-05	8.32341e-05	0.0121495	NaN	NaN
1801	AAV	CamKIIa	aIC	aIC 558	1.95	Cingulate Cortex	Prefrontal Cortex	0.2	164	576820	7.11e-05	0.000682519	0.0664486	NaN	NaN
1802	AAV	CamKIIa	aIC	aIC 558	1.95	Claustrum	Claustrum	0.2	6060	111129	0.014	0.0252199	13.0841	NaN	NaN
1803	AAV	CamKIIa	aIC	aIC 558	1.95	Olfactory Tubercle	Striatum	0.2	296	731049	0.0001012	0.00123186	0.0945794	NaN	NaN
1804	AAV	CamKIIa	aIC	aIC 558	1.95	Basal Forebrain	Basal Forebrain	0.2	44	315047	3.49e-05	0.000183115	0.0326168	NaN	NaN
1805	AAV	CamKIIa	aIC	aIC 558	1.95	Caudate Putamen	Striatum	0.2	478264	5.70421e+06	0.021	1.99039	19.6262	NaN	NaN
1806	AAV	CamKIIa	aIC	aIC 558	1.95	Fundus of Striatum (IPAC)	Striatum	0.2	2008	417963	0.001	0.0083567	0.934579	NaN	NaN
1807	AAV	CamKIIa	aIC	aIC 558	1.95	Basal Forebrain	Basal Forebrain	0.2	4	153522	6.51e-06	1.66468e-05	0.00608411	NaN	NaN
1808	AAV	CamKIIa	aIC	aIC 558	1.95	Ventral Pallidum	Pallidum	0.2	128	805037	3.98e-05	0.000532698	0.0371963	NaN	NaN
1809	AAV	CamKIIa	aIC	aIC 558	1.95	Agranular Insular Cortex, posterior	Insular Cortex	0.3	10844	375589	0.007	0.0451295	6.54206	NaN	NaN
1810	AAV	CamKIIa	aIC	aIC 558	1.95	Motor Cortex, primary	Motor Cortex	0.3	2948	826394	0.0008918	0.0122687	0.833458	NaN	NaN
1811	AAV	CamKIIa	aIC	aIC 558	1.95	Motor Cortex, secondary	Motor Cortex	0.3	1024	555372	0.000461	0.00426158	0.430841	NaN	NaN
1812	AAV	CamKIIa	aIC	aIC 558	1.95	Dysgranular Insular Cortex	Insular Cortex	0.3	41496	294368	0.035	0.172694	32.7103	NaN	NaN
1813	AAV	CamKIIa	aIC	aIC 558	1.95	Granular Insular Cortex	Insular Cortex	0.3	41456	342609	0.03	0.172528	28.0374	NaN	NaN
1814	AAV	CamKIIa	aIC	aIC 558	1.95	Somatosensory Cortex, secondary	Sensory Cortex	0.3	40720	821985	0.012	0.169465	11.215	NaN	NaN
1815	AAV	CamKIIa	aIC	aIC 558	1.95	Somatosensory Cortex, primary	Sensory Cortex	0.3	39788	2.93708e+06	0.003	0.165586	2.80374	NaN	NaN
1816	AAV	CamKIIa	aIC	aIC 558	1.95	Piriform Area	Piriform Cortex	0.3	1816	1.31535e+06	0.0003452	0.00755765	0.322617	NaN	NaN
1817	AAV	CamKIIa	aIC	aIC 558	1.95	Endopiriform Nucleus	Olfactory areas	0.3	676	345881	0.0004886	0.00281331	0.456636	NaN	NaN
1818	AAV	CamKIIa	aIC	aIC 558	1.95	Medial Prefrontal Cortex	Prefrontal Cortex	0.3	52	373719	3.48e-05	0.000216409	0.0325234	NaN	NaN
1819	AAV	CamKIIa	aIC	aIC 558	1.95	Cingulate Cortex	Prefrontal Cortex	0.3	580	588828	0.0002463	0.00241379	0.230187	NaN	NaN
1820	AAV	CamKIIa	aIC	aIC 558	1.95	Olfactory Tubercle	Striatum	0.3	60	79167.3	0.0001895	0.000249702	0.177103	NaN	NaN
1821	AAV	CamKIIa	aIC	aIC 558	1.95	Claustrum	Claustrum	0.3	21812	125658	0.043	0.0907751	40.1869	NaN	NaN
1822	AAV	CamKIIa	aIC	aIC 558	1.95	Olfactory Tubercle	Striatum	0.3	828	748189	0.0002767	0.00344589	0.258598	NaN	NaN
1823	AAV	CamKIIa	aIC	aIC 558	1.95	Basal Forebrain	Basal Forebrain	0.3	12	288474	1.04e-05	4.99404e-05	0.00971963	NaN	NaN
1824	AAV	CamKIIa	aIC	aIC 558	1.95	Ventral Pallidum	Pallidum	0.3	432	850262	0.000127	0.00179786	0.118692	NaN	NaN
1825	AAV	CamKIIa	aIC	aIC 558	1.95	Fundus of Striatum (IPAC)	Striatum	0.3	3840	276439	0.003	0.0159809	2.80374	NaN	NaN
1826	AAV	CamKIIa	aIC	aIC 558	1.95	Caudate Putamen	Striatum	0.3	556400	4.98096e+06	0.028	2.31557	26.1682	NaN	NaN
1827	AAV	CamKIIa	aIC	aIC 558	1.95	Agranular Insular Cortex, ventral	Insular Cortex	0.4	5076	256696	0.005	0.0211248	4.6729	NaN	NaN
1828	AAV	CamKIIa	aIC	aIC 558	1.95	Agranular Insular Cortex, dorsal	Insular Cortex	0.4	15592	299703	0.013	0.0648893	12.1495	NaN	NaN
1829	AAV	CamKIIa	aIC	aIC 558	1.95	Motor Cortex, primary	Motor Cortex	0.4	17880	1.80219e+06	0.002	0.0744113	1.86916	NaN	NaN
1830	AAV	CamKIIa	aIC	aIC 558	1.95	Motor Cortex, secondary	Motor Cortex	0.4	2920	1.47615e+06	0.0004945	0.0121522	0.46215	NaN	NaN
1831	AAV	CamKIIa	aIC	aIC 558	1.95	Dysgranular Insular Cortex	Insular Cortex	0.4	22360	299739	0.019	0.0930557	17.757	NaN	NaN
1832	AAV	CamKIIa	aIC	aIC 558	1.95	Granular Insular Cortex	Insular Cortex	0.4	54080	485306	0.028	0.225065	26.1682	NaN	NaN
1833	AAV	CamKIIa	aIC	aIC 558	1.95	Somatosensory Cortex, secondary	Sensory Cortex	0.4	70412	977845	0.018	0.293034	16.8224	NaN	NaN
1834	AAV	CamKIIa	aIC	aIC 558	1.95	Somatosensory Cortex, primary	Sensory Cortex	0.4	127500	4.81865e+06	0.007	0.530617	6.54206	NaN	NaN
1835	AAV	CamKIIa	aIC	aIC 558	1.95	Piriform Area	Piriform Cortex	0.4	460	1.37418e+06	8.37e-05	0.00191438	0.0782243	NaN	NaN
1836	AAV	CamKIIa	aIC	aIC 558	1.95	Olfactory Tubercle	Striatum	0.4	1592	831729	0.0004785	0.00662543	0.447196	NaN	NaN
1837	AAV	CamKIIa	aIC	aIC 558	1.95	Endopiriform Nucleus	Olfactory areas	0.4	5556	490201	0.003	0.0231224	2.80374	NaN	NaN
1838	AAV	CamKIIa	aIC	aIC 558	1.95	Medial Prefrontal Cortex	Prefrontal Cortex	0.4	408	671542	0.0001519	0.00169797	0.141963	NaN	NaN
1839	AAV	CamKIIa	aIC	aIC 558	1.95	Cingulate Cortex	Prefrontal Cortex	0.4	1172	1.14795e+06	0.0002552	0.00487752	0.238505	NaN	NaN
1840	AAV	CamKIIa	aIC	aIC 558	1.95	Claustrum	Claustrum	0.4	22372	154833	0.036	0.0931056	33.6449	NaN	NaN
1841	AAV	CamKIIa	aIC	aIC 558	1.95	Olfactory Tubercle	Striatum	0.4	464	78672.3	0.001	0.00193103	0.934579	NaN	NaN
1842	AAV	CamKIIa	aIC	aIC 558	1.95	Bed Nuclei of the Stria Terminalis (BNST)	Pallidum	0.4	12	482786	6.21e-06	4.99404e-05	0.00580374	NaN	NaN
1843	AAV	CamKIIa	aIC	aIC 558	1.95	Ventral Pallidum	Pallidum	0.4	508	819354	0.000155	0.00211415	0.14486	NaN	NaN
1844	AAV	CamKIIa	aIC	aIC 558	1.95	Fundus of Striatum (IPAC)	Striatum	0.4	15736	804570	0.005	0.0654886	4.6729	NaN	NaN
1845	AAV	CamKIIa	aIC	aIC 558	1.95	Caudate Putamen	Striatum	0.4	702920	6.6931e+06	0.026	2.92534	24.2991	NaN	NaN
1846	AAV	CamKIIa	aIC	aIC 558	1.95	Basal Forebrain	Basal Forebrain	0.4	56	419476	3.34e-05	0.000233055	0.031215	NaN	NaN
1847	AAV	CamKIIa	aIC	aIC 558	1.95	Claustrum	Claustrum	0.7	7976	158243	0.013	0.0331937	12.1495	NaN	NaN
1848	AAV	CamKIIa	aIC	aIC 558	1.95	Agranular Insular Cortex, ventral	Insular Cortex	0.7	1844	303571	0.002	0.00767418	1.86916	NaN	NaN
1849	AAV	CamKIIa	aIC	aIC 558	1.95	Agranular Insular Cortex, dorsal	Insular Cortex	0.7	10944	316632	0.009	0.0455457	8.41121	NaN	NaN
1850	AAV	CamKIIa	aIC	aIC 558	1.95	Motor Cortex, primary	Motor Cortex	0.7	26136	1.32287e+06	0.005	0.10877	4.6729	NaN	NaN
1851	AAV	CamKIIa	aIC	aIC 558	1.95	Motor Cortex, secondary	Motor Cortex	0.7	3460	693743	0.001	0.0143995	0.934579	NaN	NaN
1852	AAV	CamKIIa	aIC	aIC 558	1.95	Dysgranular Insular Cortex	Insular Cortex	0.7	13332	314955	0.011	0.0554838	10.2804	NaN	NaN
1853	AAV	CamKIIa	aIC	aIC 558	1.95	Granular Insular Cortex	Insular Cortex	0.7	12340	407166	0.008	0.0513554	7.47664	NaN	NaN
1854	AAV	CamKIIa	aIC	aIC 558	1.95	Nucleus Accumbens, core	Striatum	0.7	512	793680	0.0001613	0.00213079	0.150748	NaN	NaN
1855	AAV	CamKIIa	aIC	aIC 558	1.95	Somatosensory Cortex, secondary	Sensory Cortex	0.7	15584	634622	0.006	0.064856	5.60748	NaN	NaN
1856	AAV	CamKIIa	aIC	aIC 558	1.95	Somatosensory Cortex, primary	Sensory Cortex	0.7	35184	2.03857e+06	0.004	0.146425	3.73832	NaN	NaN
1857	AAV	CamKIIa	aIC	aIC 558	1.95	Caudate Putamen	Striatum	0.7	187468	4.68664e+06	0.01	0.780186	9.34579	NaN	NaN
1858	AAV	CamKIIa	aIC	aIC 558	1.95	Piriform Area	Piriform Cortex	0.7	100	1.45503e+06	1.72e-05	0.00041617	0.0160748	NaN	NaN
1859	AAV	CamKIIa	aIC	aIC 558	1.95	Olfactory Tubercle	Striatum	0.7	332	761709	0.000109	0.00138169	0.101869	NaN	NaN
1860	AAV	CamKIIa	aIC	aIC 558	1.95	Ventral Pallidum	Pallidum	0.7	684	1.06268e+06	0.0001609	0.0028466	0.150374	NaN	NaN
1861	AAV	CamKIIa	aIC	aIC 558	1.95	Nucleus Accumbens, shell	Striatum	0.7	2944	417423	0.002	0.0122521	1.86916	NaN	NaN
1862	AAV	CamKIIa	aIC	aIC 558	1.95	Endopiriform Nucleus	Olfactory areas	0.7	372	348622	0.0002668	0.00154815	0.249346	NaN	NaN
1863	AAV	CamKIIa	aIC	aIC 558	1.95	Medial Prefrontal Cortex	Prefrontal Cortex	0.7	380	376056	0.0002526	0.00158145	0.236075	NaN	NaN
1864	AAV	CamKIIa	aIC	aIC 558	1.95	Cingulate Cortex	Prefrontal Cortex	0.7	1076	513254	0.0005241	0.00447799	0.489813	NaN	NaN
1865	AAV	CamKIIa	aIC	aIC 558	1.95	Claustrum	Claustrum	0.8	19608	155071	0.032	0.0816027	29.9065	NaN	NaN
1866	AAV	CamKIIa	aIC	aIC 558	1.95	Agranular Insular Cortex, ventral	Insular Cortex	0.8	5116	225852	0.006	0.0212913	5.60748	NaN	NaN
1867	AAV	CamKIIa	aIC	aIC 558	1.95	Agranular Insular Cortex, dorsal	Insular Cortex	0.8	27608	300894	0.023	0.114896	21.4953	NaN	NaN
1868	AAV	CamKIIa	aIC	aIC 558	1.95	Motor Cortex, primary	Motor Cortex	0.8	21512	1.44806e+06	0.004	0.0895266	3.73832	NaN	NaN
1869	AAV	CamKIIa	aIC	aIC 558	1.95	Motor Cortex, secondary	Motor Cortex	0.8	3728	962904	0.0009679	0.0155148	0.904579	NaN	NaN
1870	AAV	CamKIIa	aIC	aIC 558	1.95	Dysgranular Insular Cortex	Insular Cortex	0.8	29872	285431	0.026	0.124318	24.2991	NaN	NaN
1871	AAV	CamKIIa	aIC	aIC 558	1.95	Granular Insular Cortex	Insular Cortex	0.8	23072	375882	0.015	0.0960188	14.0187	NaN	NaN
1872	AAV	CamKIIa	aIC	aIC 558	1.95	Cingulate Cortex	Prefrontal Cortex	0.8	212	698500	7.59e-05	0.000882281	0.0709346	NaN	NaN
1873	AAV	CamKIIa	aIC	aIC 558	1.95	Medial Prefrontal Cortex	Prefrontal Cortex	0.8	168	341894	0.0001228	0.000699166	0.114766	NaN	NaN
1874	AAV	CamKIIa	aIC	aIC 558	1.95	Nucleus Accumbens, core	Striatum	0.8	428	724871	0.0001476	0.00178121	0.137944	NaN	NaN
1875	AAV	CamKIIa	aIC	aIC 558	1.95	Nucleus Accumbens, shell	Striatum	0.8	9368	1.32337e+06	0.002	0.0389868	1.86916	NaN	NaN
1876	AAV	CamKIIa	aIC	aIC 558	1.95	Endopiriform Nucleus	Olfactory areas	0.8	1136	369411	0.0007688	0.00472769	0.718505	NaN	NaN
1877	AAV	CamKIIa	aIC	aIC 558	1.95	Somatosensory Cortex, secondary	Sensory Cortex	0.8	32296	532007	0.015	0.134406	14.0187	NaN	NaN
1878	AAV	CamKIIa	aIC	aIC 558	1.95	Somatosensory Cortex, primary	Sensory Cortex	0.8	72664	1.93529e+06	0.009	0.302406	8.41121	NaN	NaN
1879	AAV	CamKIIa	aIC	aIC 558	1.95	Caudate Putamen	Striatum	0.8	324660	4.28054e+06	0.019	1.35114	17.757	NaN	NaN
1880	AAV	CamKIIa	aIC	aIC 558	1.95	Olfactory Tubercle	Striatum	0.8	724	897715	0.0002016	0.00301307	0.188411	NaN	NaN
1881	AAV	CamKIIa	aIC	aIC 558	1.95	Piriform Area	Piriform Cortex	0.8	168	1.23452e+06	3.4e-05	0.000699166	0.0317757	NaN	NaN
1882	AAV	CamKIIa	aIC	aIC 558	1.95	Basal Forebrain	Basal Forebrain	0.8	12	607371	4.94e-06	4.99404e-05	0.00461682	NaN	NaN
1883	AAV	CamKIIa	aIC	aIC 558	1.95	Claustrum	Claustrum	0.9	10788	166850	0.016	0.0448965	14.9533	NaN	NaN
1884	AAV	CamKIIa	aIC	aIC 558	1.95	Agranular Insular Cortex, ventral	Insular Cortex	0.9	1636	340803	0.001	0.00680855	0.934579	NaN	NaN
1885	AAV	CamKIIa	aIC	aIC 558	1.95	Agranular Insular Cortex, dorsal	Insular Cortex	0.9	29556	294460	0.025	0.123003	23.3645	NaN	NaN
1886	AAV	CamKIIa	aIC	aIC 558	1.95	Motor Cortex, primary	Motor Cortex	0.9	53724	2.09838e+06	0.006	0.223583	5.60748	NaN	NaN
1887	AAV	CamKIIa	aIC	aIC 558	1.95	Motor Cortex, secondary	Motor Cortex	0.9	3844	1.08314e+06	0.0008872	0.0159976	0.829159	NaN	NaN
1888	AAV	CamKIIa	aIC	aIC 558	1.95	Dysgranular Insular Cortex	Insular Cortex	0.9	59920	329007	0.046	0.249369	42.9907	NaN	NaN
1889	AAV	CamKIIa	aIC	aIC 558	1.95	Granular Insular Cortex	Insular Cortex	0.9	46600	415360	0.028	0.193935	26.1682	NaN	NaN
1890	AAV	CamKIIa	aIC	aIC 558	1.95	Cingulate Cortex	Prefrontal Cortex	0.9	664	709068	0.0002341	0.00276337	0.218785	NaN	NaN
1891	AAV	CamKIIa	aIC	aIC 558	1.95	Medial Prefrontal Cortex	Prefrontal Cortex	0.9	484	400099	0.0003024	0.00201426	0.282617	NaN	NaN
1892	AAV	CamKIIa	aIC	aIC 558	1.95	Nucleus Accumbens, core	Striatum	0.9	8976	1.00235e+06	0.002	0.0373554	1.86916	NaN	NaN
1893	AAV	CamKIIa	aIC	aIC 558	1.95	Olfactory Tubercle	Striatum	0.9	816	1.79207e+06	0.0001138	0.00339595	0.106355	NaN	NaN
1894	AAV	CamKIIa	aIC	aIC 558	1.95	Nucleus Accumbens, shell	Striatum	0.9	19364	2.39905e+06	0.002	0.0805872	1.86916	NaN	NaN
1895	AAV	CamKIIa	aIC	aIC 558	1.95	Lateral Septum	Pallidum	0.9	0	1.3748e+06	3.78e-05	0	0.0353271	NaN	NaN
1896	AAV	CamKIIa	aIC	aIC 558	1.95	Basal Forebrain	Basal Forebrain	0.9	64	1.02114e+06	1.57e-05	0.000266349	0.0146729	NaN	NaN
1897	AAV	CamKIIa	aIC	aIC 558	1.95	Endopiriform Nucleus	Olfactory areas	0.9	3240	414902	0.002	0.0134839	1.86916	NaN	NaN
1898	AAV	CamKIIa	aIC	aIC 558	1.95	Piriform Area	Piriform Cortex	0.9	148	1.62721e+06	2.27e-05	0.000615932	0.021215	NaN	NaN
1899	AAV	CamKIIa	aIC	aIC 558	1.95	Somatosensory Cortex, secondary	Sensory Cortex	0.9	62344	479825	0.032	0.259457	29.9065	NaN	NaN
1900	AAV	CamKIIa	aIC	aIC 558	1.95	Somatosensory Cortex, primary	Sensory Cortex	0.9	134328	1.66147e+06	0.02	0.559033	18.6916	NaN	NaN
1901	AAV	CamKIIa	aIC	aIC 558	1.95	Caudate Putamen	Striatum	0.9	365384	4.05751e+06	0.023	1.52062	21.4953	NaN	NaN
1902	AAV	CamKIIa	aIC	aIC 558	1.95	Somatosensory Cortex, primary	Sensory Cortex	1.2	268264	1.95213e+06	0.034	1.11644	31.7757	NaN	NaN
1903	AAV	CamKIIa	aIC	aIC 558	1.95	Motor Cortex, primary	Motor Cortex	1.2	8524	2.31577e+06	0.0009202	0.0354744	0.86	NaN	NaN
1904	AAV	CamKIIa	aIC	aIC 558	1.95	Motor Cortex, secondary	Motor Cortex	1.2	24	1.04208e+06	5.76e-06	9.98809e-05	0.00538318	NaN	NaN
1905	AAV	CamKIIa	aIC	aIC 558	1.95	Caudate Putamen	Striatum	1.2	10636	2.29399e+06	0.001	0.0442639	0.934579	NaN	NaN
1906	AAV	CamKIIa	aIC	aIC 558	1.95	Cingulate Cortex	Prefrontal Cortex	1.2	32	867889	9.22e-06	0.000133175	0.00861682	NaN	NaN
1907	AAV	CamKIIa	aIC	aIC 558	1.95	Medial Prefrontal Cortex	Prefrontal Cortex	1.2	372	470063	0.0001978	0.00154815	0.18486	NaN	NaN
1908	AAV	CamKIIa	aIC	aIC 558	1.95	Nucleus Accumbens, core	Striatum	1.2	16	743808	5.38e-06	6.65873e-05	0.00502804	NaN	NaN
1909	AAV	CamKIIa	aIC	aIC 558	1.95	Lateral Septum	Pallidum	1.2	0	693807	0.0002191	0	0.204766	NaN	NaN
1910	AAV	CamKIIa	aIC	aIC 558	1.95	Olfactory Tubercle	Striatum	1.2	8	1.05737e+06	1.89e-06	3.32936e-05	0.00176636	NaN	NaN
1911	AAV	CamKIIa	aIC	aIC 558	1.95	Endopiriform Nucleus	Olfactory areas	1.2	8	286559	6.98e-06	3.32936e-05	0.00652336	NaN	NaN
1912	AAV	CamKIIa	aIC	aIC 558	1.95	Nucleus Accumbens, shell	Striatum	1.2	76	1.14477e+06	1.66e-05	0.000316289	0.015514	NaN	NaN
1913	AAV	CamKIIa	aIC	aIC 558	1.95	Somatosensory Cortex, primary	Sensory Cortex	1.4	268800	1.86484e+06	0.036	1.11867	33.6449	NaN	NaN
1914	AAV	CamKIIa	aIC	aIC 558	1.95	Motor Cortex, primary	Motor Cortex	1.4	724	1.8912e+06	9.57e-05	0.00301307	0.0894393	NaN	NaN
1915	AAV	CamKIIa	aIC	aIC 558	1.95	Motor Cortex, secondary	Motor Cortex	1.4	20	1.21642e+06	4.11e-06	8.32341e-05	0.00384112	NaN	NaN
1916	AAV	CamKIIa	aIC	aIC 558	1.95	Caudate Putamen	Striatum	1.4	216	1.84627e+06	2.93e-05	0.000898928	0.0273832	NaN	NaN
1917	AAV	CamKIIa	aIC	aIC 558	1.95	Endopiriform Nucleus	Olfactory areas	1.6	128	347797	9.2e-05	0.000532698	0.0859813	NaN	NaN
1918	AAV	CamKIIa	aIC	aIC 558	1.95	Tenia Tecta	Olfactory areas	1.6	1072	780206	0.0003435	0.00446135	0.321028	NaN	NaN
1919	AAV	CamKIIa	aIC	aIC 558	1.95	Medial Prefrontal Cortex	Prefrontal Cortex	1.6	264	283296	0.000233	0.00109869	0.217757	NaN	NaN
1920	AAV	CamKIIa	aIC	aIC 558	1.95	Medial Prefrontal Cortex	Prefrontal Cortex	1.6	68	466443	3.65e-05	0.000282996	0.0341121	NaN	NaN
1921	AAV	CamKIIa	aIC	aIC 558	1.95	Cingulate Cortex	Prefrontal Cortex	1.6	656	557040	0.0002944	0.00273008	0.27514	NaN	NaN
1922	AAV	CamKIIa	aIC	aIC 558	1.95	Motor Cortex, secondary	Motor Cortex	1.6	22416	1.02282e+06	0.005	0.0932887	4.6729	NaN	NaN
1923	AAV	CamKIIa	aIC	aIC 558	1.95	Motor Cortex, primary	Motor Cortex	1.6	138792	1.71607e+06	0.02	0.577611	18.6916	NaN	NaN
1924	AAV	CamKIIa	aIC	aIC 558	1.95	Motor Cortex, primary	Prefrontal Cortex	1.6	55800	317100	0.044	0.232223	41.1215	NaN	NaN
1925	AAV	CamKIIa	aIC	aIC 558	1.95	Somatosensory Cortex, primary	Sensory Cortex	1.6	567508	1.51164e+06	0.094	2.3618	87.8505	NaN	NaN
1926	AAV	CamKIIa	aIC	aIC 558	1.95	Nucleus Accumbens, shell	Striatum	1.6	264	651991	0.0001012	0.00109869	0.0945794	NaN	NaN
1927	AAV	CamKIIa	aIC	aIC 558	1.95	Olfactory Tubercle	Striatum	1.6	216	877284	6.16e-05	0.000898928	0.0575701	NaN	NaN
1928	AAV	CamKIIa	aIC	aIC 558	1.95	Piriform Area	Piriform Cortex	1.6	312	803763	9.7e-05	0.00129845	0.0906542	NaN	NaN
1929	AAV	CamKIIa	aIC	aIC 558	1.95	Nucleus Accumbens, core	Striatum	1.6	40	861216	1.16e-05	0.000166468	0.0108411	NaN	NaN
1930	AAV	CamKIIa	aIC	aIC 558	1.95	Caudate Putamen	Striatum	1.6	316	859841	9.19e-05	0.0013151	0.0858879	NaN	NaN
1931	AAV	CamKIIa	aIC	aIC 558	1.95	Orbitofrontal Cortex	Prefrontal Cortex	1.6	924	505728	0.0004568	0.00384541	0.426916	NaN	NaN
1932	AAV	CamKIIa	aIC	aIC 558	1.95	Olfactory Tubercle	Striatum	1.7	532	878512	0.0001514	0.00221403	0.141495	NaN	NaN
1933	AAV	CamKIIa	aIC	aIC 558	1.95	Piriform Area	Piriform Cortex	1.7	140	763441	4.59e-05	0.000582638	0.0428972	NaN	NaN
1934	AAV	CamKIIa	aIC	aIC 558	1.95	Endopiriform Nucleus	Olfactory areas	1.7	220	457460	0.0001202	0.000915575	0.112336	NaN	NaN
1935	AAV	CamKIIa	aIC	aIC 558	1.95	Tenia Tecta	Olfactory areas	1.7	116	711937	4.07e-05	0.000482758	0.0380374	NaN	NaN
1936	AAV	CamKIIa	aIC	aIC 558	1.95	Orbitofrontal Cortex	Prefrontal Cortex	1.7	1844	701598	0.0006571	0.00767418	0.614112	NaN	NaN
1937	AAV	CamKIIa	aIC	aIC 558	1.95	Medial Prefrontal Cortex	Prefrontal Cortex	1.7	164	316816	0.0001294	0.000682519	0.120935	NaN	NaN
1938	AAV	CamKIIa	aIC	aIC 558	1.95	Medial Prefrontal Cortex	Prefrontal Cortex	1.7	20	316807	1.58e-05	8.32341e-05	0.0147664	NaN	NaN
1939	AAV	CamKIIa	aIC	aIC 558	1.95	Medial Prefrontal Cortex	Prefrontal Cortex	1.7	44	572109	1.92e-05	0.000183115	0.0179439	NaN	NaN
1940	AAV	CamKIIa	aIC	aIC 558	1.95	Cingulate Cortex	Prefrontal Cortex	1.7	784	484601	0.0004045	0.00326278	0.378037	NaN	NaN
1941	AAV	CamKIIa	aIC	aIC 558	1.95	Motor Cortex, secondary	Motor Cortex	1.7	18276	1.17995e+06	0.004	0.0760593	3.73832	NaN	NaN
1942	AAV	CamKIIa	aIC	aIC 558	1.95	Motor Cortex, primary	Motor Cortex	1.7	100344	1.64557e+06	0.015	0.417602	14.0187	NaN	NaN
1943	AAV	CamKIIa	aIC	aIC 558	1.95	Motor Cortex, primary	Prefrontal Cortex	1.7	39460	277127	0.036	0.164221	33.6449	NaN	NaN
1944	AAV	CamKIIa	aIC	aIC 558	1.95	Somatosensory Cortex, primary	Sensory Cortex	1.7	583932	1.69262e+06	0.086	2.43015	80.3738	NaN	NaN
1945	AAV	CamKIIa	aIC	aIC 558	1.95	Caudate Putamen	Striatum	1.7	24	213743	2.81e-05	9.98809e-05	0.0262617	NaN	NaN
1946	AAV	CamKIIa	aIC	aIC 558	1.95	Nucleus Accumbens, core	Striatum	1.7	84	632651	3.32e-05	0.000349583	0.031028	NaN	NaN
1947	AAV	CamKIIa	aIC	aIC 558	1.95	Nucleus Accumbens, shell	Striatum	1.7	600	522264	0.0002872	0.00249702	0.268411	NaN	NaN
1948	AAV	CamKIIa	aIC	aIC 558	1.95	Olfactory Tubercle	Striatum	1.9	360	1.06587e+06	8.44e-05	0.00149821	0.0788785	NaN	NaN
1949	AAV	CamKIIa	aIC	aIC 558	1.95	Piriform Area	Piriform Cortex	1.9	80	854470	2.34e-05	0.000332936	0.0218692	NaN	NaN
1950	AAV	CamKIIa	aIC	aIC 558	1.95	Nucleus Accumbens, core	Striatum	1.9	232	424508	0.0001366	0.000965515	0.127664	NaN	NaN
1951	AAV	CamKIIa	aIC	aIC 558	1.95	Endopiriform Nucleus	Olfactory areas	1.9	108	315423	8.56e-05	0.000449464	0.08	NaN	NaN
1952	AAV	CamKIIa	aIC	aIC 558	1.95	Caudate Putamen	Striatum	1.9	168	563530	7.45e-05	0.000699166	0.0696262	NaN	NaN
1953	AAV	CamKIIa	aIC	aIC 558	1.95	Nucleus Accumbens, shell	Striatum	1.9	196	845542	5.8e-05	0.000815694	0.0542056	NaN	NaN
1954	AAV	CamKIIa	aIC	aIC 558	1.95	Tenia Tecta	Olfactory areas	1.9	28	936359	7.48e-06	0.000116528	0.00699065	NaN	NaN
1955	AAV	CamKIIa	aIC	aIC 558	1.95	Orbitofrontal Cortex	Prefrontal Cortex	1.9	752	654778	0.0002871	0.0031296	0.268318	NaN	NaN
1956	AAV	CamKIIa	aIC	aIC 558	1.95	Medial Prefrontal Cortex	Prefrontal Cortex	1.9	4	316816	3.16e-06	1.66468e-05	0.00295327	NaN	NaN
1957	AAV	CamKIIa	aIC	aIC 558	1.95	Medial Prefrontal Cortex	Prefrontal Cortex	1.9	16	418046	9.57e-06	6.65873e-05	0.00894393	NaN	NaN
1958	AAV	CamKIIa	aIC	aIC 558	1.95	Medial Prefrontal Cortex	Prefrontal Cortex	1.9	64	551265	2.9e-05	0.000266349	0.0271028	NaN	NaN
1959	AAV	CamKIIa	aIC	aIC 558	1.95	Cingulate Cortex	Prefrontal Cortex	1.9	764	498267	0.0003833	0.00317954	0.358224	NaN	NaN
1960	AAV	CamKIIa	aIC	aIC 558	1.95	Motor Cortex, secondary	Motor Cortex	1.9	11536	1.13906e+06	0.003	0.0480094	2.80374	NaN	NaN
1961	AAV	CamKIIa	aIC	aIC 558	1.95	Motor Cortex, primary	Motor Cortex	1.9	34584	1.32082e+06	0.007	0.143928	6.54206	NaN	NaN
1962	AAV	CamKIIa	aIC	aIC 558	1.95	Motor Cortex, primary	Prefrontal Cortex	1.9	12384	209390	0.015	0.0515385	14.0187	NaN	NaN
1963	AAV	CamKIIa	aIC	aIC 558	1.95	Somatosensory Cortex, primary	Sensory Cortex	1.9	380504	1.63472e+06	0.058	1.58354	54.2056	NaN	NaN
1964	AAV	CamKIIa	aIC	aIC 558	1.95	Medial Prefrontal Cortex	Prefrontal Cortex	2	1924	384379	0.001	0.00800712	0.934579	NaN	NaN
1965	AAV	CamKIIa	aIC	aIC 558	1.95	Orbitofrontal Cortex	Prefrontal Cortex	2	188	696942	6.74e-05	0.0007824	0.0629907	NaN	NaN
1966	AAV	CamKIIa	aIC	aIC 558	1.95	Piriform Area	Piriform Cortex	2	304	1.62914e+06	4.67e-05	0.00126516	0.0436449	NaN	NaN
1967	AAV	CamKIIa	aIC	aIC 558	1.95	Anterior Olfactory Nucleus	Olfactory areas	2	656	698940	0.0002346	0.00273008	0.219252	NaN	NaN
1968	AAV	CamKIIa	aIC	aIC 558	1.95	Motor Cortex, primary	Prefrontal Cortex	2	126416	316229	0.1	0.526106	93.4579	NaN	NaN
1969	AAV	CamKIIa	aIC	aIC 558	1.95	Motor Cortex, secondary	Motor Cortex	2	134036	1.56204e+06	0.021	0.557818	19.6262	NaN	NaN
1970	AAV	CamKIIa	aIC	aIC 558	1.95	Motor Cortex, primary	Motor Cortex	2	642560	1.83968e+06	0.087	2.67414	81.3084	NaN	NaN
1971	AAV	CamKIIa	aIC	aIC 558	1.95	Endopiriform Nucleus	Olfactory areas	2	120	477103	6.29e-05	0.000499404	0.058785	NaN	NaN
1972	AAV	CamKIIa	aIC	aIC 558	1.95	Tenia Tecta	Olfactory areas	2	44	551605	1.99e-05	0.000183115	0.0185981	NaN	NaN
1973	AAV	CamKIIa	aIC	aIC 558	1.95	Orbitofrontal Cortex	Prefrontal Cortex	2	7232	576050	0.003	0.0300974	2.80374	NaN	NaN
1974	AAV	CamKIIa	aIC	aIC 558	1.95	Orbitofrontal Cortex	Prefrontal Cortex	2	7592	725329	0.003	0.0315957	2.80374	NaN	NaN
1975	AAV	CamKIIa	aIC	aIC 558	1.95	Medial Prefrontal Cortex	Prefrontal Cortex	2.2	0	591899	0	0	0	NaN	NaN
1976	AAV	CamKIIa	aIC	aIC 558	1.95	Orbitofrontal Cortex	Prefrontal Cortex	2.2	6092	1.12493e+06	0.001	0.0253531	0.934579	NaN	NaN
1977	AAV	CamKIIa	aIC	aIC 558	1.95	Orbitofrontal Cortex	Prefrontal Cortex	2.2	12	543080	5.52e-06	4.99404e-05	0.00515888	NaN	NaN
1978	AAV	CamKIIa	aIC	aIC 558	1.95	Orbitofrontal Cortex	Prefrontal Cortex	2.2	8	582907	3.43e-06	3.32936e-05	0.00320561	NaN	NaN
1979	AAV	CamKIIa	aIC	aIC 558	1.95	Piriform Area	Piriform Cortex	2.2	92	1.66784e+06	1.38e-05	0.000382877	0.0128972	NaN	NaN
1980	AAV	CamKIIa	aIC	aIC 558	1.95	Endopiriform Nucleus	Olfactory areas	2.2	0	614255	0	0	0	NaN	NaN
1981	AAV	CamKIIa	aIC	aIC 558	1.95	Anterior Olfactory Nucleus	Olfactory areas	2.2	0	754138	0	0	0	NaN	NaN
1982	AAV	CamKIIa	aIC	aIC 558	1.95	Tenia Tecta	Olfactory areas	2.2	20	630314	7.93e-06	8.32341e-05	0.00741121	NaN	NaN
1983	AAV	CamKIIa	aIC	aIC 558	1.95	Motor Cortex, primary	Prefrontal Cortex	2.2	137516	338494	0.102	0.572301	95.3271	NaN	NaN
1984	AAV	CamKIIa	aIC	aIC 558	1.95	Motor Cortex, secondary	Motor Cortex	2.2	12596	1.72152e+06	0.002	0.0524208	1.86916	NaN	NaN
1985	AAV	CamKIIa	aIC	aIC 558	1.95	Motor Cortex, primary	Motor Cortex	2.2	441944	1.64308e+06	0.067	1.83924	62.6168	NaN	NaN
1986	AAV	CamKIIa	aIC	aIC 558	1.95	Medial Prefrontal Cortex	Prefrontal Cortex	2.3	17992	765128	0.006	0.0748774	5.60748	NaN	NaN
1987	AAV	CamKIIa	aIC	aIC 558	1.95	Orbitofrontal Cortex	Prefrontal Cortex	2.3	31828	987836	0.008	0.132459	7.47664	NaN	NaN
1988	AAV	CamKIIa	aIC	aIC 558	1.95	Orbitofrontal Cortex	Prefrontal Cortex	2.3	4408	671918	0.002	0.0183448	1.86916	NaN	NaN
1989	AAV	CamKIIa	aIC	aIC 558	1.95	Orbitofrontal Cortex	Prefrontal Cortex	2.3	168	690837	6.08e-05	0.000699166	0.0568224	NaN	NaN
1990	AAV	CamKIIa	aIC	aIC 558	1.95	Piriform Area	Piriform Cortex	2.3	268	1.65568e+06	4.05e-05	0.00111534	0.0378505	NaN	NaN
1991	AAV	CamKIIa	aIC	aIC 558	1.95	Endopiriform Nucleus	Olfactory areas	2.3	152	442171	8.59e-05	0.000632579	0.0802804	NaN	NaN
1992	AAV	CamKIIa	aIC	aIC 558	1.95	Anterior Olfactory Nucleus	Olfactory areas	2.3	764	792864	0.0002409	0.00317954	0.22514	NaN	NaN
1993	AAV	CamKIIa	aIC	aIC 558	1.95	Tenia Tecta	Olfactory areas	2.3	84	477222	4.4e-05	0.000349583	0.0411215	NaN	NaN
1994	AAV	CamKIIa	aIC	aIC 558	1.95	Motor Cortex, primary	Prefrontal Cortex	2.3	107436	253139	0.106	0.447117	99.0654	NaN	NaN
1995	AAV	CamKIIa	aIC	aIC 558	1.95	Motor Cortex, primary	Motor Cortex	2.3	301836	703120	0.107	1.25615	100	NaN	NaN
1996	AAV	CamKIIa	aIC	aIC 558	1.95	Motor Cortex, secondary	Motor Cortex	2.3	582676	2.50386e+06	0.058	2.42492	54.2056	NaN	NaN
1997	AAV	CamKIIa	aIC	aIC 558	1.95	Medial Prefrontal Cortex	Prefrontal Cortex	2.5	2044	468734	0.001	0.00850652	0.934579	NaN	NaN
1998	AAV	CamKIIa	aIC	aIC 558	1.95	Motor Cortex, secondary	Motor Cortex	2.5	586660	2.45624e+06	0.06	2.4415	56.0748	NaN	NaN
1999	AAV	CamKIIa	aIC	aIC 558	1.95	Orbitofrontal Cortex	Prefrontal Cortex	2.5	22360	828163	0.007	0.0930557	6.54206	NaN	NaN
[truncated: 20,524 more rows]

## Sheet: readme
	Readme
	This resource table containts the entire dataset for anterograde AAV and retrograde RV tracings of Gehrlach et al 2020.
	For a quick navigation of our data, we provide 5 example pivot tables created from the raw data .
	How to create your own pivot table
	1. click on the table in the "raw data" tab; then go to "Insert" and click on "Pivot Table" and then "OK"
	2. Select appropriate Filters and choose which values to depict as columns or rows
	3. Use "Sum of .." to display Values given as "percent of total output/input"
	or Use "Average of .." for densities

## Sheet: Example 1 RV (bargraph)
Example Pivot Table for accessing Rabies tracings
Data presented as "percent of total input" for all subregions
Tracing_Type	RV	<--- choose RV (afferents)
Genotype	CamKIIa	<--- choose CamKIIa (excitatory) or GAD2 (inhibitory) neurons
Tracing_From	aIC	<--- choose anterior (aIC), medial (mIC) or posterior insular cortex (pIC)
Larger Brain Regions	Amygdala	(optional): Filter by larger brain regions
Sum of Percent_Total_Input	Column Labels
Row Labels	aIC 461	aIC 557	aIC 872
Amygdalopiriform Transition Area	0.81948	3.69893	0.0573912
Anterior Amygdaloid Area	0.210723	0.754509	0.147577
Basolateral Nucleus	1.12386	1.90651	0.524719
Basomedial Nucleus	0.134629	0.463747	0.0409937
Central Nucleus of Amygdala	0	0	0
Cortical Amygdala	0.0351206	0.717703	0.0409937
Extended Amygdala	0.866308	0.228193	0.0737886
Lateral Amygdala	0.0526809	0.301803	0.0573912
Medial Amygdala	0.00585343	0.0552079
Grand Total	3.24865	8.12661	0.942855

## Sheet: Example 2 RV (rostro-caudal)
Example Pivot Table for accessing Rabies tracings along the anterior-posterior Axis
Data presented as averaged cell_density
Tracing_Type	RV	<--- choose RV (afferents)
Genotype	CamKIIa	<--- choose CamKIIa (excitatory) or GAD2 (inhibitory) neurons
Tracing_From	aIC	<--- choose anterior (aIC), medial (mIC) or posterior insular cortex (pIC)
Larger Brain Regions	(All)	<--- Filter by larger brain regions
Subregions	Piriform Area	<--- Filter by subregion
Row Labels	Average of Cell_Density[cells/mm²]_Input
-2.9	3.47714
-2.8	46.0937
-2.7	2.70354
-2.5	98.7588
-2.4	4.03039
-2.3	1.20929
-2	4.48003
-1.9	119.247
-1.8	4.10578
-1.7	11.4521
-1.6	75.3273
-1.5	3.09886
-1.4	80.0539
-1.3	208.633
-1.2	96.8181
-1.1	2.60205
-1	52.7981
-0.9	123.375
-0.8	7.79911
-0.7	121.614
-0.6	159.384
-0.5	86.7948
-0.4	85.9685
-0.3	353.971
-0.2	91.5873
-0.1	114.505
0	112.407
0.1	130.593
0.2	122.742
0.3	29.4651
0.4	167.458
0.5	98.8472
0.6	94.9968
0.7	143.353
0.8	144.919
0.9	13.0422
1	223.179
1.1	134.755
1.2	467.125
1.3	11.953
1.4	420.819
1.5	66.0611
1.6	4.35956
1.7	94.9
1.8	56.3157
1.9	5.936
2	56.5443
2.1	9.80539
2.2	12.2033
2.3	10.2785
2.4	3.20997
2.6	4.04626

## Sheet: Example 3 AAV (bargraph)
Example Pivot Table for accessing AAV tracings
Data presented as "percent of total output" for all subregions
Tracing_Type	AAV	<--- choose AAV (efferents)
Tracing_From	aIC	<--- choose anterior (aIC), medial (mIC) or posterior insular cortex (pIC)
Larger Brain Regions	(All)	(optional): Filter by larger brain regions
Sum of Percent_Total_Output	Column Labels
Row Labels	aIC 1294	aIC 558	aIC 839
Agranular Insular Cortex	1.69537
Agranular Insular Cortex, dorsal	0.973751	0.348335	1.46702
Agranular Insular Cortex, posterior	1.18028	0.861223	1.87173
Agranular Insular Cortex, ventral	0.213386	0.0568988	1.15171
Amygdalopiriform Transition Area	0.000179225	0.000216409	0.00543806
Anterior Amygdaloid Area	0.0651374	0.0258359	0.0406605
Anterior Olfactory Nucleus	0.182218	0.00908916	0.53279
Anterodorsal Thalamic Nucleus	0.119769	0.00431152	0.00046969
Auditory Cortex, primary	0.00488082	0.0142663	0.00532387
Auditory Cortex, secondary or higher	0.0350496	0.00922233	0.0250767
Basal Forebrain	0.0202304	0.00399524	0.0981544
Basolateral Nucleus	0.744121	0.484389	1.53399
Basomedial Nucleus	0.0132921	0.00302972	0.0148857
Bed Nuclei of the Stria Terminalis (BNST)	0.112463	0.00174792	0.3141
Caudate Putamen	20.6305	25.8919	33.6284
Central Nucleus of Amygdala	0.104754	0.0929392	0.439518
Cerebellum			0
Cingulate Cortex	0.792399	0.0326444	0.50482
Claustrum	0.566792	0.462715	0.681098
Cortical Amygdala	0.0140311	0.00297978	0.00779944
Dysgranular Insular Cortex	2.16629	1.86449	3.0896
Ectorhinal Cortex	0.558898	0.161274	0.697923
Endopiriform Nucleus	0.433278	0.0881116	1.77275
Entorhinal Cortex	0.0769392	0.00179786	0.373554
Extended Amygdala	0.431368	0.0547014	0.181576
Frontal Association Cortex	1.33947	6.25923	1.31276
Fundus of Striatum (IPAC)	0.852518	0.406432	1.40734
Globus Pallidus	1.33828	1.92128	0.552237
Granular Insular Cortex	2.01311	2.40703	3.04067
Habenular Nuclei	0.000888761	0.00176456	7.10998e-05
Hippocampus (CA1,CA2,CA3)	0.0213966	0.0761925	0.0290604
Hippocampus (Dentate Gyrus)			0.000215454
Hypothalamic Lateral Zone	0.487233	1.40189	0.138858
Hypothalamic Medial Zone	0.00757902	0.101296	0.0313356
Inferior Colliculus		0.00467775	0.0123412
Intralaminar Nuclei of the Dorsal Thalamus	2.61708	3.15522	0.368392
Lateral Amygdala	0.0678331	0.11766	0.261578
Lateral Septum		0
Main Olfactory Bulb	0.00498885	0.00597621	0.190028
Medial Amygdala	0.00298054	0.000948868	0.00462149
Medial Prefrontal Cortex	0.444987	0.245257	1.39736
Mediodorsal Thalamic Nuclei	1.74961	2.07198	0.197343
Medulla	0.20499	0.170663	0.488271
Midbrain Reticular Nucleus	0.456661	3.60084	0.708633
Motor Cortex, primary	12.9903	9.51255	4.1311
Motor Cortex, secondary	10.0215	5.7957	4.12418
Motor Trigeminal Nucleus	0.0705829		0.0802911
Nucleus Accumbens, core	2.99746	0.0428156	5.1982
Nucleus Accumbens, shell	0.643635	0.136554	2.67293
Nucleus of the Lateral Olfactory Tract	0.00605929	0.00116528	0.000262854
Olfactory Tubercle	0.296871	0.0261355	2.85359
Orbitofrontal Cortex	2.27161	1.15519	2.23969
Parabrachial Nucleus	0.312476	0.298594	0.584458
Paraventricular Thalamic Nucleus	0.0385654	0.0253697	0.00275135
Parietal Cortex	0.0324152	0.00484422	0
Pedunculopontine Nucleus	0.541698	0.929974	0.943331
Periaqueductal Gray	0.0755103	0.587449	0.0221121
Perirhinal Cortex	0.62573	0.164071	0.473055
Piriform Area	0.437376	0.03073	6.74672
Piriform-Amygdalar Area	0.0194717	0.00276337	0.0175121
Posterior Complex of the Thalamus	0.116504	1.74417	0.0644552
Raphe Nuclei	0.0942455	0.405616	0.420513
Retrosplenial Cortex	0.242838	0.020126	0.000323181
Somatosensory Cortex, primary	15.5837	11.4989	5.17817
Somatosensory Cortex, secondary	4.31978	2.95145	3.32755
Substantia Nigra	2.17878	4.09305	0.623576
Superior Colliculus	0.00539149	0.0146492
Temporal Association Cortex	0.0179962	0.00381212	0.0250724
Tenia Tecta	0.0405368	0.0057598	0.998024
Ventral Group of the Dorsal Thalamus	2.85954	6.28111	0.127719
Ventral Pallidum	0.245266	0.40828	0.550078
Ventral Tegmental Area	0.126761	1.42981
Visual Cortex, primary	0.0423684	0.00487752	0.0148039
Grand Total	100	100	100

## Sheet: Example 4 AAV (rostro-caudal)
Example Pivot Table for accessing AAV tracings along the anterior-posterior Axis
Data presented as "percent density"
Tracing_Type	AAV	<--- choose AAV (efferents)
Tracing_From	aIC	<--- choose anterior (aIC), medial (mIC) or posterior insular cortex (pIC)
Larger Brain Regions	(All)	<--- Filter by larger brain regions
Subregions	Basolateral Nucleus	<--- Filter by subregion
Row Labels	Average of Percent_Density_Output
-3.1	0
-2.9	0
-2.8	0.019778
-2.7	0.0490868
-2.4	0.345024
-2.3	0.233645
-2.2	0.642669
-2	1.37452
-1.9	1.73174
-1.8	6.83411
-1.7	2.7666
-1.6	3.78312
-1.5	0.100561
-1.4	6.4009
-1.3	8.06139
-1.2	9.43348
-1.1	28.9136
-1	12.8608
-0.9	26.1122
-0.8	63.9593
-0.7	69.8012
-0.6	19.2757
-0.5	24.8072
1	73.4813

## Sheet: Example 5 RV (cell density) 
Example Pivot Table for accessing RV cell densities (cells/mm²)
Tracing_Type	RV
Genotype	CamKIIa
Average of Cell_Density[cells/mm²]_Input	Column Labels
Row Labels	aIC	mIC	pIC
Agranular Insular Cortex		331.233	35.2457
Agranular Insular Cortex, dorsal	203.767	320.204	60.862
Agranular Insular Cortex, posterior	125.224	266.483	109.195
Agranular Insular Cortex, ventral	64.8945	352.833	34.2066
Amygdalopiriform Transition Area	107.819	152.391	58.6799
Anterior Amygdaloid Area	49.1804	118.81	25.0656
Anterior Olfactory Nucleus	3.90323	89.6783	5.37148
Anterodorsal Thalamic Nucleus	12.766	5.40077	2.51187
Auditory Cortex, primary	2.67118	7.70169	9.76563
Auditory Cortex, secondary or higher	8.92661	14.0942	12.4849
Basal Forebrain	13.2253	39.8155	8.9988
Basolateral Nucleus	65.2947	197.851	29.4478
Basomedial Nucleus	17.462	63.6651	10.1498
Bed Nuclei of the Stria Terminalis (BNST)	0.646969	0	0.724752
Caudate Putamen	0	0	0
Central Nucleus of Amygdala	0	0	0
Cingulate Cortex	6.97017	14.4833	0.679491
Claustrum	89.1708	307.296	42.0734
Cortical Amygdala	21.3584	79.1241	13.1988
Dysgranular Insular Cortex	248.569	362.014	133.099
Ectorhinal Cortex	31.6236	53.4608	20.5081
Endopiriform Nucleus	35.8132	92.3753	13.4601
Entorhinal Cortex	81.5707	75.0934	13.9568
Extended Amygdala	23.4557	43.0831	9.62522
Frontal Association Cortex		144.999	16.8796
Fundus of Striatum (IPAC)	0	0	0
Globus Pallidus	38.642	29.117	16.7787
Granular Insular Cortex	248.037	400.224	128.224
Habenular Nuclei	9.71958	4.51002	1.70377
Hippocampus (CA1,CA2,CA3)	8.74931	7.16647	2.07872
Hypothalamic Lateral Zone	16.2346	21.4362	6.74803
Hypothalamic Medial Zone	5.19517	3.53594	1.5692
Intralaminar Nuclei of the Dorsal Thalamus	66.9525	43.8587	12.4088
Lateral Amygdala	47.8841	143.092	9.06364
Lateral Septum	0	0	0
Main Olfactory Bulb	0	27.8292	6.93388
Medial Amygdala	6.50451	2.00223	0.76414
Medial Geniculate Nuclei	1.07318	3.69638	35.5857
Medial Prefrontal Cortex	4.8262	19.0502	1.01697
Mediodorsal Thalamic Nuclei	109.341	109.821	28.8478
Midbrain Reticular Nucleus	16.4556	21.0182	11.3535
Motor Cortex, primary	85.0882	83.9926	38.7564
Motor Cortex, secondary	23.195	22.0101	4.3982
Nucleus Accumbens, core	0	0	0
Nucleus Accumbens, shell	0	0	0
Nucleus of the Lateral Olfactory Tract	47.5904	104.024	11.7058
Olfactory Tubercle	0	0	0
Orbitofrontal Cortex	53.5677	133.742	8.729
Parabrachial Nucleus	13.6061	43.3965	13.2274
Paraventricular Thalamic Nucleus	27.4824	29.8826	10.7326
Parietal Cortex	4.1293	6.73574	0.458176
Pedunculopontine Nucleus	30.848	24.4667	8.94299
Periaqueductal Gray	10.7079	17.8512	10.0117
Perirhinal Cortex	68.6087	98.2214	21.3539
Piriform Area	87.2396	252.729	44.8217
Piriform-Amygdalar Area	47.1027	380.305	42.748
Posterior Complex of the Thalamus	28.2154	28.8581	80.2395
Raphe Nuclei	55.8233	56.663	4.45484
Retrosplenial Cortex	4.15345	5.40072	2.73286
Somatosensory Cortex, primary	40.9261	117.305	57.3604
Somatosensory Cortex, secondary	107.465	177.03	137.721
Substantia Nigra	12.2597	19.0111	9.06926
Temporal Association Cortex	20.0823	14.3805	4.97552
Tenia Tecta	28.0175	17.8942	1.64215
Ventral Group of the Dorsal Thalamus	63.8817	66.2488	55.8605
Ventral Pallidum	27.0679	70.126	20.0597
Ventral Tegmental Area	36.4598	14.7657	8.96589
Visual Cortex, primary	1.2004	1.32344	1.96075
Visual Cortex, secondary or higher		0.293353	2.49742
