# Supplementary material for: A whole-brain connectivity map of mouse insular cortex
Source: eLife. 2020 Sep 17;9:e55585. doi: 10.7554/eLife.55585 (PMC7538160; doi:10.7554/eLife.55585)
Supplement: Supplementary file 3. [file elife-55585-supp3.xlsx]

## Sheet: Figure 2A
	Excitatory inputs	Insular Cortex	Ordinary one-way ANOVA	one-way ANOVA not significant					Inhibitory inputs	Insular Cortex	Ordinary one-way ANOVA	one-way ANOVA not significant					Excitatory outputs	Insular Cortex	Ordinary one-way ANOVA
																				pIC vs. mIC	Tuckey	ns	0.2092
			F (2, 6) = 0.4090								F (2, 6) = 0.2848								F (2, 6) = 0.5403	pIC vs. aIC	Tuckey	*	0.0498
			P = 0.6815								P = 0.7618								*P = 0.0455	mIC vs. aIC	Tuckey	ns	0.2092
		Sensory Cortex	Ordinary one-way ANOVA	one-way ANOVA not significant						Sensory Cortex	Ordinary one-way ANOVA	one-way ANOVA not significant						Sensory Cortex	Ordinary one-way ANOVA	one-way ANOVA not significant
			F (2, 6) = 1.759								F (2, 6) = 4.294								F (2, 6) = 1.186
			P = 0.2505								P = 0.0696								P = 0.3681
		Motor Cortex	Ordinary one-way ANOVA	one-way ANOVA not significant						Motor Cortex	Ordinary one-way ANOVA							Motor Cortex	Ordinary one-way ANOVA	one-way ANOVA not significant
												pIC vs. mIC	Tuckey	ns	0.1383
			F (2, 6) = 1.782								F (2, 6) = 8.586	pIC vs. aIC	Tuckey	*	0.0185				F (2, 6) = 2.615
			P = 0.2469								*P = 0.0174	mIC vs. aIC	Tuckey	ns	0.1018				P = 0.1526
		Prefrontal Cortex	Ordinary one-way ANOVA	one-way ANOVA not significant						Prefrontal Cortex	Ordinary one-way ANOVA							Prefrontal Cortex	Ordinary one-way ANOVA	one-way ANOVA not significant
												pIC vs. mIC	Tuckey	ns	0.9171
			F (2, 6) = 4.897								F (2, 6) = 7.610	pIC vs. aIC	Tuckey	*	0.0413				F (2, 6) = 1.443
			P = 0.0548								*P = 0.0226	mIC vs. aIC	Tuckey	*	0.0413				P = 0.3079
		Association Cortex	Ordinary one-way ANOVA	one-way ANOVA not significant						Association Cortex	Ordinary one-way ANOVA							Association Cortex	Ordinary one-way ANOVA	one-way ANOVA not significant
												pIC vs. mIC	Tuckey	*	0.0141
			F (2, 6) = 0.1315								F (2, 6) = 22.16	pIC vs. aIC	Tuckey	**	0.0017				F (2, 6) = 1.683
			P = 0.8792								**P = 0.0017	mIC vs. aIC	Tuckey	*	0.0407				P = 0.2629
		Piriform Cortex	Ordinary one-way ANOVA	one-way ANOVA not significant						Piriform Cortex	Ordinary one-way ANOVA	one-way ANOVA not significant						Piriform Cortex	Ordinary one-way ANOVA	one-way ANOVA not significant
			F (2, 6) = 1.180								F (2, 6) = 2.052								F (2, 6) = 0.06686
			P = 0.3696								P = 0.2094								P = 0.9360
		Olfactory Areas	Ordinary one-way ANOVA							Olfactory Areas	Ordinary one-way ANOVA	one-way ANOVA not significant						Olfactory Areas	Ordinary one-way ANOVA	one-way ANOVA not significant
				pIC vs. mIC	Tuckey	ns	0.0769
			F (2, 6) = 6.360	pIC vs. aIC	Tuckey	ns	0.8086				F (2, 6) = 4.707								F (2, 6) = 1.122
			*P = 0.0329	mIC vs. aIC	Tuckey	*	0.0353				P = 0.0590								P = 0.3854
		Claustrum	Ordinary one-way ANOVA	one-way ANOVA not significant						Claustrum	Ordinary one-way ANOVA	one-way ANOVA not significant						Claustrum	Ordinary one-way ANOVA
																				pIC vs. mIC	Tuckey	***	0.0002
			F (2, 6) = 1.049								F (2, 6) = 2.033								F (2, 6) = 45.59	pIC vs. aIC	Tuckey	**	0.005
			P = 0.4068								P = 0.2118								***P = 0.0002	mIC vs. aIC	Tuckey	**	0.004
		Striatum	All values = 0							Striatum	Ordinary one-way ANOVA	one-way ANOVA not significant						Striatum	Ordinary one-way ANOVA
																				pIC vs. mIC	Tuckey	ns	0.7084
											F (2, 6) = 1.000								F (2, 6) = 10.13	pIC vs. aIC	Tuckey	*	0.0204
											P = 0.4219								*P = 0.0119	mIC vs. aIC	Tuckey	*	0.0194
		Pallidum	Ordinary one-way ANOVA							Pallidum	Ordinary one-way ANOVA	one-way ANOVA not significant						Pallidum	Ordinary one-way ANOVA	one-way ANOVA not significant
				pIC vs. mIC	Tuckey	ns	0.1013
			F (2, 6) = 5.147	pIC vs. aIC	Tuckey	ns	0.5595				F (2, 6) = 0.4477								F (2, 6)= 0.9972
			*P = 0.0499	mIC vs. aIC	Tuckey	ns	0.0672				P = 0.6588								P = 0.4228
		Basal Forebrain	Ordinary one-way ANOVA	one-way ANOVA not significant						Basal Forebrain	Ordinary one-way ANOVA	one-way ANOVA not significant						Basal Forebrain	Ordinary one-way ANOVA	one-way ANOVA not significant
			F (2, 6) = 0.1278								F (2, 6) = 0.9133								F (2, 6)= 0.2062
			P = 0.8824								P = 0.4505								P = 0.8192
		Hippocampus	Ordinary one-way ANOVA	one-way ANOVA not significant						Hippocampus	Ordinary one-way ANOVA	one-way ANOVA not significant						Hippocampus	Ordinary one-way ANOVA	one-way ANOVA not significant
			F (2, 6) = 0.2761								F (2, 6) = 4.996								F (2, 6)= 0.9522
			P = 0.7679								P = 0.0528								P = 0.4374
		Amygdala	Ordinary one-way ANOVA	one-way ANOVA not significant						Amygdala	Ordinary one-way ANOVA							Amygdala	Ordinary one-way ANOVA	one-way ANOVA not significant
												pIC vs. mIC	Tuckey	*	0.0443
			F (2, 6) = 1.223								F (2, 6) = 15.80	pIC vs. aIC	Tuckey	**	0.0033				F (2, 6)= 2.978
			P = 0.3585								**P = 0.0041	mIC vs. aIC	Tuckey	ns	0.1103				P = 0.1264
		Hypothalamus	Ordinary one-way ANOVA	one-way ANOVA not significant						Hypothalamus	Ordinary one-way ANOVA	one-way ANOVA not significant						Hypothalamus	Ordinary one-way ANOVA	one-way ANOVA not significant
			F (2, 6) = 0.9641								F (2, 6) = 3.686								F (2, 6)= 0.2023
			P = 0.4334								P = 0.0903								P = 0.8222
		Thalamus	Ordinary one-way ANOVA	one-way ANOVA not significant						Thalamus	Ordinary one-way ANOVA	one-way ANOVA not significant						Thalamus	Ordinary one-way ANOVA	one-way ANOVA not significant
			F (2, 6) = 1.198								F (2, 6) = 0.9349								F (2, 6)= 1.171
			P = 0.3649								P = 0.4432								P = 0.3722
		Midbrain	Ordinary one-way ANOVA	one-way ANOVA not significant						Midbrain	Ordinary one-way ANOVA	one-way ANOVA not significant						Midbrain	Ordinary one-way ANOVA	one-way ANOVA not significant
			F (2, 6) = 1.375								F (2, 6) = 1.960								F (2, 6)= 2.200
			P = 0.3223								P = 0.2212								P = 0.1920
		Hindbrain	Ordinary one-way ANOVA	one-way ANOVA not significant						Hindbrain	Ordinary one-way ANOVA	one-way ANOVA not significant						Hindbrain	Ordinary one-way ANOVA
																				pIC vs. mIC	Tuckey	ns	0.2468
			F (2, 6) = 0.1009								F (2, 6) = 5.033								F (2, 6)= 9.178	pIC vs. aIC	Tuckey	*	0.0125
			P = 0.9055								P = 0.0521								*P = 0.0149	mIC vs. aIC	Tuckey	ns	0.1068

## Sheet: Figure 3C
Excitatory inputs	LA	Ordinary one-way ANOVA						Inhibitory inputs	LA	Ordinary one-way ANOVA	one-way ANOVA not significant					Excitatory outputs	LA	Ordinary one-way ANOVA	one-way ANOVA not significant
			aIC vs. mIC	Tuckey	ns	0.1045
		F (2, 6) = 7.609	aIC vs. pIC	Tuckey	ns	0.4144				F (2, 6) = 3.873								F (2, 6) = 0.9462
		*P = 0.0226	mIC vs. pIC	Tuckey	*	0.0199				P = 0.0832								P = 0.4394
	aBLA	Ordinary one-way ANOVA							aBLA	Ordinary one-way ANOVA	one-way ANOVA not significant						aBLA	Ordinary one-way ANOVA	one-way ANOVA not significant
			aIC vs. mIC	Tuckey	ns	0.1909
		F (2, 6) = 6.009	aIC vs. pIC	Tuckey	ns	0.3797				F (2, 6) = 1.659								F (2, 6) = 0.2431
		*P = 0.0369	mIC vs. pIC	Tuckey	*	0.0315				P = 0.2670								P = 0.7915
	pBLA	Ordinary one-way ANOVA							pBLA	Ordinary one-way ANOVA	one-way ANOVA not significant						pBLA	Ordinary one-way ANOVA	one-way ANOVA not significant
			aIC vs. mIC	Tuckey	***	0.0004
		F (2, 6) = 43.26	aIC vs. pIC	Tuckey	ns	0.9558				F (2, 6) = 4.994								F (2, 6) = 2.661
		***P = 0.0003	mIC vs. pIC	Tuckey	***	0.0005				P = 0.0529								P = 0.1488
	vBLA	Ordinary one-way ANOVA	one-way ANOVA not significant						vBLA	Ordinary one-way ANOVA							vBLA	Ordinary one-way ANOVA	one-way ANOVA not significant
											aIC vs. mIC	Tuckey	*	0.0494
		F (2, 6)= 1.095								F (2, 6) = 22.80	aIC vs. pIC	Tuckey	**	0.0013				F (2, 6)= 2.699
		P = 0.3931								**P = 0.0016	mIC vs. pIC	Tuckey	*	0.0244				P = 0.1458
	aBMA	Ordinary one-way ANOVA	one-way ANOVA not significant						aBMA	Ordinary one-way ANOVA	one-way ANOVA not significant						aBMA	Ordinary one-way ANOVA
																			aIC vs. mIC	Tuckey	*	0.0379
		F (2, 6) = 0.6332								F (2, 6) = 0.1343								F (2, 6) = 5.803	aIC vs. pIC	Tuckey	ns	0.1168
		P = 0.5630								P = 0.8769								*P = 0.0396	mIC vs. pIC	Tuckey	ns	0.6593
	pBMA	Ordinary one-way ANOVA	one-way ANOVA not significant						pBMA	Ordinary one-way ANOVA	one-way ANOVA not significant						pBMA	Ordinary one-way ANOVA	one-way ANOVA not significant
		F (2, 6) = 3.197								F (2, 6) = 3.909								F (2, 6) = 2.496
		P = 0.1134								P = 0.0819								P = 0.1626
	ACo	Ordinary one-way ANOVA	one-way ANOVA not significant						ACo	Ordinary one-way ANOVA							ACo	Ordinary one-way ANOVA	one-way ANOVA not significant
											aIC vs. mIC	Tuckey	ns	0.0605
		F (2, 6) = 1.560								F (2, 6) = 14.06	aIC vs. pIC	Tuckey	**	0.0055				F (2, 6) = 2.616
		P = 0.2847								**P = 0.0054	mIC vs. pIC	Tuckey	ns	0.0605				P = 0.1525
	AA	Ordinary one-way ANOVA	one-way ANOVA not significant						AA	Ordinary one-way ANOVA	one-way ANOVA not significant						AA	Ordinary one-way ANOVA	one-way ANOVA not significant
		F (2, 6) = 0.05284								F (2, 6) = 3.582								F (2, 6) = 1.871
		P = 0.9490								P = 0.0947								P = 0.2336
	Apir	Ordinary one-way ANOVA	one-way ANOVA not significant						Apir	Ordinary one-way ANOVA							Apir	Ordinary one-way ANOVA
											aIC vs. mIC	Tuckey	ns	0.1841					aIC vs. mIC	Tuckey	ns	0.4473
		F (2, 6) = 0.06012								F (2, 6) = 10.55	aIC vs. pIC	Tuckey	*	0.0121				F (2, 6) = 11.37	aIC vs. pIC	Tuckey	**	0.0086
		P = 0.9422								*P = 0.0109	mIC vs. pIC	Tuckey	*	0.0469				**P = 0.0091	mIC vs. pIC	Tuckey	*	0.0365
	CeC	All values = 0							CeC	All values = 0							CeC	Ordinary one-way ANOVA	one-way ANOVA not significant
																		F (2, 6) = 2.494
																		P = 0.1628
	CeL	All values = 0							CeL	All values = 0							CeL	Ordinary one-way ANOVA	one-way ANOVA not significant
																		F (2, 6) = 2.286
																		P = 0.1828
	CeM	All values = 0							CeM	All values = 0							CeM	Ordinary one-way ANOVA	one-way ANOVA not significant
																		F (2, 6) = 2.545
																		P = 0.1584
	MeA	Ordinary one-way ANOVA	one-way ANOVA not significant						MeA	Ordinary one-way ANOVA	one-way ANOVA not significant						MeA	Ordinary one-way ANOVA	one-way ANOVA not significant
		F (2, 6) = 1.000								F (2, 6) = 1.253								F (2, 6) = 1.982
		P = 0.4219								P = 0.3509								P = 0.2183
	EA	Ordinary one-way ANOVA	one-way ANOVA not significant						EA	Ordinary one-way ANOVA							EA	Ordinary one-way ANOVA	one-way ANOVA not significant
											aIC vs. mIC	Tuckey	ns	0.4442
		F (2, 6) = 0.4005								F (2, 6) = 7.297	aIC vs. pIC	Tuckey	ns	0.0596				F (2, 6) = 0.3280
		P = 0.6866								*P = 0.0247	mIC vs. pIC	Tuckey	*	0.0321				P = 0.7325

## Sheet: Figure 4C
Excitatory outputs	Cpu	Ordinary one-way ANOVA
			aIC vs. mIC	Tuckey	**	0.0022
		F (2, 6) = 25.92	aIC vs. pIC	Tuckey	**	0.0017
		**P = 0.0011	mIC vs. pIC	Tuckey	ns	0.959
	NacC	Ordinary one-way ANOVA	one-way ANOVA not significant
		F (2, 6) = 1.336
		P = 0.3313
	NacSh	Ordinary one-way ANOVA	one-way ANOVA not significant
		F (2, 6) = 0.9463
		P = 0.4393
	IPAC	Ordinary one-way ANOVA
			aIC vs. mIC	Tuckey	ns	0.96
		F (2, 6)= 7.394	aIC vs. pIC	Tuckey	*	0.0312
		*P = 0.0240	mIC vs. pIC	Tuckey	*	0.0433
	Tu	Ordinary one-way ANOVA	one-way ANOVA not significant
		F (2, 6) = 1.039
		P = 0.4097

## Sheet: Figure 5
Excitatory inputs	VP	Ordinary one-way ANOVA	one-way ANOVA not significant					Inhibitory inputs	VP	Ordinary one-way ANOVA	one-way ANOVA not significant					Excitatory outputs	VP	Ordinary one-way ANOVA
																			aIC vs. mIC	Tuckey	ns	0.6567
		F (2, 6) = 2.069								F (2, 6) = 0.6633								F (2, 6) = 9.316	aIC vs. pIC	Tuckey	*	0.0224
		P = 0.2073								P = 0.5492								*P = 0.0145	mIC vs. pIC	Tuckey	*	0.026
	VM	Ordinary one-way ANOVA	one-way ANOVA not significant						VM	Ordinary one-way ANOVA	one-way ANOVA not significant						VM	Ordinary one-way ANOVA	one-way ANOVA not significant
		F (2, 6) = 1.149								F (2, 6) = 0.8043								F (2, 6) = 2.083
		P = 0.3779								P = 0.4904								P = 0.2055
	VAL	Ordinary one-way ANOVA	one-way ANOVA not significant						VAL	Ordinary one-way ANOVA	one-way ANOVA not significant						VAL	Ordinary one-way ANOVA	one-way ANOVA not significant
		F (2, 6) = 4.121								F (2, 6) = 0.6881								F (2, 6) = 2.695
		P = 0.0748								P = 0.5382								P = 0.1462
	MGN	Ordinary one-way ANOVA							MGN	Ordinary one-way ANOVA	one-way ANOVA not significant						MGN	Ordinary one-way ANOVA
			aIC vs. mIC	Tuckey	ns	0.9984													aIC vs. mIC	Tuckey	ns	>0.9999
		F (2, 6)= 12.23	aIC vs. pIC	Tuckey	*	0.0119				F (2, 6) = 2.933								F (2, 6)= 6.276	aIC vs. pIC	Tuckey	ns	0.0645
		**P = 0.0076	mIC vs. pIC	Tuckey	*	0.0126				P = 0.1293								*P = 0.0338	mIC vs. pIC	Tuckey	ns	0.0645
	Po	Ordinary one-way ANOVA	one-way ANOVA not significant						Po	Ordinary one-way ANOVA	one-way ANOVA not significant						Po	Ordinary one-way ANOVA	one-way ANOVA not significant
		F (2, 6) = 1.830								F (2, 6) = 2.570								F (2, 6) = 0.2602
		P = 0.2397								P = 0.1563								P = 0.7792
	MD	Ordinary one-way ANOVA	one-way ANOVA not significant						MD	Ordinary one-way ANOVA	one-way ANOVA not significant						MD	Ordinary one-way ANOVA	one-way ANOVA not significant
		F (2, 6) = 1.656								F (2, 6) = 1.366								F (2, 6) = 3.895
		P = 0.2675								P = 0.3245								P = 0.0824
	ATN	Ordinary one-way ANOVA	one-way ANOVA not significant						ATN	Ordinary one-way ANOVA	one-way ANOVA not significant						ATN	Ordinary one-way ANOVA	one-way ANOVA not significant
		F (2, 6) = 0.4707								F (2, 6) = 1.197								F (2, 6) = 1.000
		P = 0.6458								P = 0.3652								P = 0.4219
	CM	Ordinary one-way ANOVA							CM	Ordinary one-way ANOVA							CM	Ordinary one-way ANOVA	one-way ANOVA not significant
			aIC vs. mIC	Tuckey	**	0.0082					aIC vs. mIC	Tuckey	**	0.0031
		F (2, 6) = 15.61	aIC vs. pIC	Tuckey	**	0.0059				F (2, 6) = 21.56	aIC vs. pIC	Tuckey	**	0.0031				F (2, 6) = 3.013
		**P = 0.0042	mIC vs. pIC	Tuckey	ns	0.9471				**P = 0.0018	mIC vs. pIC	Tuckey	ns	0.9998				P = 0.1242
	PaF	Ordinary one-way ANOVA	one-way ANOVA not significant						PaF	Ordinary one-way ANOVA	one-way ANOVA not significant						PaF	Ordinary one-way ANOVA	one-way ANOVA not significant
		F (2, 6) = 3.412								F (2, 6) = 0.5217								F (2, 6) = 1.146
		P = 0.1024								P = 0.6181								P = 0.3789
	RH	Ordinary one-way ANOVA	one-way ANOVA not significant						RH	Ordinary one-way ANOVA	one-way ANOVA not significant						RH	Ordinary one-way ANOVA	one-way ANOVA not significant
		F (2, 6) = 1.000								F (2, 6) = 1.000								F (2, 6) = 2.368
		P = 0.4219								P = 0.4219								P = 0.1745
	PVT	Ordinary one-way ANOVA	one-way ANOVA not significant						PVT	Ordinary one-way ANOVA	one-way ANOVA not significant						PVT	Ordinary one-way ANOVA	one-way ANOVA not significant
		F (2, 6) = 0.01093								F (2, 6) = 0.2913								F (2, 6) = 0.7247
		P = 0.9892								P = 0.7573								P = 0.5225

## Sheet: Figure 6A
cortical	aIC	r = 0.7892	subcortical	aIC	r = 0.004773
		****P<0.0001			P = 0.9761
	mIC	r = 0.5345		mIC	r = 0.04985
		**P = 0.0072			P = 0.7569
	pIC	r = 0.6582		pIC	r = 0.2064
		***P= 0.0005			P = 0.1955

## Sheet: Figure 1 - figure supplement 2B
Figure 1 - figure supplement 2B
Excitatory input			Inhibitory input			Excitatory output
Two-way RM ANOVA (Row Factor)			Two-way RM ANOVA (Row Factor)			Two-way RM ANOVA (Row Factor)
F (5, 25) = 23.95			F (5, 30) = 11.46			F (5, 30) = 15.40
****P<0.0001			****P<0.0001			****P<0.0001
Tuckey			Tuckey			Tuckey
aIC			aIC			aIC
VI vs. V	ns	>0.9999	VI vs. V	ns	0.0738	VI vs. V	ns	>0.9999
VI vs. IV	**	0.0026	VI vs. IV	ns	0.5358	VI vs. IV	ns	>0.9999
VI vs. III	ns	>0.9999	VI vs. III	ns	0.099	VI vs. III	**	0.0045
VI vs. II	ns	0.0525	VI vs. II	ns	0.9752	VI vs. II	ns	>0.9999
VI vs. I	**	0.0041	VI vs. I	ns	0.9902	VI vs. I	ns	>0.9999
V vs. IV	**	0.0037	V vs. IV	***	0.001	V vs. IV	ns	0.101
V vs. III	ns	>0.9999	V vs. III	ns	>0.9999	V vs. III	ns	0.1792
V vs. II	ns	0.071	V vs. II	*	0.0129	V vs. II	ns	>0.9999
V vs. I	**	0.0059	V vs. I	*	0.0182	V vs. I	ns	0.3464
IV vs. III	**	0.0037	IV vs. III	**	0.0014	IV vs. III	****	<0.0001
IV vs. II	ns	0.7976	IV vs. II	ns	0.9236	IV vs. II	ns	0.5837
IV vs. I	ns	>0.9999	IV vs. I	ns	0.8736	IV vs. I	ns	>0.9999
III vs. II	ns	0.071	III vs. II	*	0.0182	III vs. II	*	0.0268
III vs. I	**	0.0059	III vs. I	*	0.0255	III vs. I	***	0.0003
II vs. I	ns	0.8837	II vs. I	ns	>0.9999	II vs. I	ns	>0.9999
mIC			mIC			mIC
VI vs. V	ns	0.8837	VI vs. V	ns	0.9488	VI vs. V	ns	>0.9999
VI vs. IV	ns	0.1043	VI vs. IV	ns	>0.9999	VI vs. IV	ns	>0.9999
VI vs. III	ns	0.5769	VI vs. III	ns	0.0738	VI vs. III	*	0.0344
VI vs. II	ns	0.2886	VI vs. II	ns	0.8919	VI vs. II	ns	>0.9999
VI vs. I	*	0.0428	VI vs. I	ns	0.6511	VI vs. I	ns	>0.9999
V vs. IV	**	0.0093	V vs. IV	ns	0.8919	V vs. IV	ns	0.1601
V vs. III	ns	0.9925	V vs. III	ns	0.3724	V vs. III	ns	0.7877
V vs. II	*	0.0347	V vs. II	ns	>0.9999	V vs. II	ns	>0.9999
V vs. I	**	0.0033	V vs. I	ns	0.9862	V vs. I	ns	0.2792
IV vs. III	**	0.0023	IV vs. III	*	0.0489	IV vs. III	***	0.0007
IV vs. II	ns	0.9925	IV vs. II	ns	0.8097	IV vs. II	ns	>0.9999
IV vs. I	ns	0.998	IV vs. I	ns	0.5358	IV vs. I	ns	>0.9999
III vs. II	**	0.0093	III vs. II	ns	0.479	III vs. II	ns	0.1135
III vs. I	***	0.0008	III vs. I	ns	0.7604	III vs. I	**	0.0014
II vs. I	ns	0.9174	II vs. I	ns	0.9971	II vs. I	ns	>0.9999
pIC			pIC			pIC
VI vs. V	*	0.0245	VI vs. V	ns	0.7856	VI vs. V	ns	>0.9999
VI vs. IV	ns	0.8787	VI vs. IV	ns	0.9932	VI vs. IV	ns	0.1792
VI vs. III	ns	0.1517	VI vs. III	ns	0.0815	VI vs. III	ns	>0.9999
VI vs. II	ns	0.8543	VI vs. II	ns	0.8097	VI vs. II	ns	>0.9999
VI vs. I	ns	0.7027	VI vs. I	ns	0.9488	VI vs. I	ns	0.0799
V vs. IV	**	0.0017	V vs. IV	ns	0.4513	V vs. IV	ns	0.2502
V vs. III	ns	0.9515	V vs. III	ns	0.6511	V vs. III	ns	>0.9999
V vs. II	**	0.0015	V vs. II	ns	0.1438	V vs. II	ns	>0.9999
V vs. I	***	0.0007	V vs. I	ns	0.2796	V vs. I	ns	0.1135
IV vs. III	*	0.0143	IV vs. III	*	0.0228	IV vs. III	ns	0.3464
IV vs. II	ns	>0.9999	IV vs. II	ns	0.9813	IV vs. II	ns	>0.9999
IV vs. I	ns	0.9993	IV vs. I	ns	0.9995	IV vs. I	ns	>0.9999
III vs. II	*	0.0125	III vs. II	**	0.0039	III vs. II	ns	>0.9999
III vs. I	**	0.0062	III vs. I	*	0.0102	III vs. I	ns	0.1601
II vs. I	ns	0.9997	II vs. I	ns	0.999	II vs. I	ns	>0.9999
Excitatory input			Inhibitory input			Excitatory output
Two-way RM ANOVA (Column Factor)			Two-way RM ANOVA (Column Factor)			Two-way RM ANOVA (Column Factor)
F (2, 5) = 0.05682			F (2, 6) = 0.000			F (2, 6) = 0.2500
P=0.9454			P>0.9999			P=0.7865

## Sheet: Figure 1 - figure supplement 2C
Excitatory inputs	M/S	Ordinary one-way ANOVA	one-way ANOVA not significant					Inhibitory inputs	M/S	Ordinary one-way ANOVA	one-way ANOVA not significant					Excitatory outputs	M/S	Ordinary one-way ANOVA	one-way ANOVA not significant
		F (2, 6) = 0.5970								F (2, 6) = 1.649								F (2, 6) = 1.655
		P=0.5801								P=0.2688								P=0.2677
	GI	Ordinary one-way ANOVA	one-way ANOVA not significant						GI	Ordinary one-way ANOVA							GI	Ordinary one-way ANOVA
											aIC vs. mIC	Tuckey	**	0.0091					aIC vs. mIC	Tuckey	ns	0.3575
		F (2, 6) = 1.392								F (2, 6) = 12.49	aIC vs. pIC	Tuckey	*	0.016				F (2, 6) = 5.947	aIC vs. pIC	Tuckey	*	0.0319
		P=0.3187								**P=0.0073	mIC vs. pIC	Tuckey	ns	0.8621				*P=0.0377	mIC vs. pIC	Tuckey	ns	0.2071
	DI	Ordinary one-way ANOVA	one-way ANOVA not significant						DI	Ordinary one-way ANOVA							DI	Ordinary one-way ANOVA
											aIC vs. mIC	Tuckey	**	0.0088					aIC vs. mIC	Tuckey	ns	0.0681
		F (2, 6) = 3.263								F (2, 6) = 23.24	aIC vs. pIC	Tuckey	**	0.0013				F (2, 6) = 12.59	aIC vs. pIC	Tuckey	**	0.0059
		P=0.1099								**P=0.0015	mIC vs. pIC	Tuckey	ns	0.1781				**P=0.0071	mIC vs. pIC	Tuckey	ns	0.1526
	AI	Ordinary one-way ANOVA	one-way ANOVA not significant						AI	Ordinary one-way ANOVA							AI	Ordinary one-way ANOVA
											aIC vs. mIC	Tuckey	*	0.0149					aIC vs. mIC	Tuckey	ns	0.1546
		F (2, 6) = 0.3483								F (2, 6) = 9.308	aIC vs. pIC	Tuckey	*	0.0424				F (2, 6) = 7.984	aIC vs. pIC	Tuckey	*	0.0213
		P=0.7192								*P = 0.0145	mIC vs. pIC	Tuckey	ns	0.6581				*P = 0.0204	mIC vs. pIC	Tuckey	ns	0.1546
	Pir	Ordinary one-way ANOVA							Pir	Ordinary one-way ANOVA	one-way ANOVA not significant						Pir	Ordinary one-way ANOVA	one-way ANOVA not significant
			aIC vs. mIC	Tuckey	*	0.0343
		F (2, 6) = 6.403	aIC vs. pIC	Tuckey	ns	0.0781				F (2, 6) = 2.327								F (2, 6) = 0.5397
		*P=0.0325	mIC vs. pIC	Tuckey	ns	0.7896				P=0.1786								P=0.6088
